# Supplementary material for: An efficient synthesis of hydropyrido[1,2-a]indole-6(7H)-ones via an In(iii)-catalyzed tandem cyclopropane ring-opening/Friedel–Crafts alkylation sequence
Source: Royal Society of Chemistry journal article supplement (doi:10.1039/c1cc14131g), 2011-01-01

## Supporting Information

For

### **An Efficient Synthesis of Hydropyrido[1,2-*a*]indole-6(7*H*)-ones via an In(III)-catalyzed Tandem Cyclopropane Ring-opening/Friedel-Crafts Alkylation Sequence**

Dadasaheb V. Patil, Marchello A. Cavitt, Paul L. Grzybowski, and Stefan France\*

School of Chemistry and Biochemistry, Georgia Institute of Technology, 901 Atlantic Drive, Atlanta,  
Georgia 30332

stefan.france@chemistry.gatech.edu

#### **Table of Contents**

1. General Methods
2. Experimental Procedures
  - A. N-Acylation of Indole compounds
  - B. Formation of the Diazo Compounds
  - C. Synthesis of the Cyclopropanes
  - D. In(OTf)<sub>3</sub>-Catalyzed Homo-Nazarov Cyclizations
3. References
4. Characterization/Spectra

## 1. General Methods

All reactions were carried out in pre-dried glassware from the oven where additional moisture was removed by flame-drying the reaction vessel. Each reaction proceeded under a nitrogen atmosphere, and dry solvents were used, unless stated otherwise. Tetrahydrofuran and diethyl ether were distilled from a sodium/benzophenone ketyl under nitrogen and stored in a Schlenk flask. 1,2-Dichloroethane and dichloromethane were purified by distillation from calcium hydride under N<sub>2</sub> prior to use. Acetonitrile was dried by fractional distillation over CaH<sub>2</sub>. Benzene was purified by drying with CaH<sub>2</sub>. All other reagents were purchased from Acros, Sigma-Aldrich, Fluka, VWR, Merck, Alfa Aesar, TCI and Strem (for metal catalysts) and used without further purification.

Chromatographic purification was performed as flash chromatography with Silicycle silica gel (40-63 μm) and solvents indicated as eluent with 0.1-0.5 bar pressure. For quantitative flash chromatography, technical grade solvents were utilized. Analytical thin-layer chromatography (TLC) was performed on EMD silica gel 60 F<sub>254</sub> TLC glass plates. Visualization was accomplished with UV light, aqueous basic potassium permanganate (KMnO<sub>4</sub>) solution, iodine, aqueous acidic dinitrophenylhydrazine (DNP) solution, aqueous acidic *p*-anisaldehyde (PAA) solution, and ethanol solution of phosphomolybdic acid (PMA) followed by heating. Each yield refers to isolated analytically pure material.

Infrared (IR) spectra were obtained using a Nicolet 4700 FTIR with an ATR attachment from SmartOrbit ThermoElectronic Corp. The IR bands are characterized as broad (br), weak (w), medium (m), and strong (s). Proton and carbon nuclear magnetic resonance spectra (<sup>1</sup>H NMR and <sup>13</sup>C NMR) were recorded on a Varian Mercury Vx 300 spectrometer or a Varian Mercury Vx 400 spectrometer with solvent resonances as the internal standard (<sup>1</sup>H NMR: CDCl<sub>3</sub> at 7.26 ppm; <sup>13</sup>C NMR: CDCl<sub>3</sub> at 77.0 ppm). <sup>1</sup>H NMR data are reported as follows: chemical shift (ppm), multiplicity (s = singlet, d = doublet, dd = doublet of doublets, dt = doublet of triplets, ddd = doublet of doublet of doublets, t = triplet, m = multiplet), coupling constants (Hz), and integration. Mass spectra were obtained using a VG-70SE instrument.

Diastereomeric ratios for cyclized products **4** were determined by <sup>1</sup>H NMR based on comparing the integral ratios of the benzylic protons (~4.0-5.0 ppm) for the two diastereomeric protons. The first signal represents the *trans* isomer and the second signal represents the *cis* isomer. This assignment is based on the coupling constants assigned from <sup>1</sup>H NMR in conjunction with decoupling experiments to assign all the coupled proton signals.

## 2. Experimental Procedures

### A. N-Acylation of Indole Compounds

Sodium hydride (1.1 equiv.) was suspended in THF (20 mL) and cooled to 0 °C. In a separate flask, the desired indole (1.0 equiv.) was dissolved in 30 mL of THF and syringed into the reaction vessel. After 30 min, methyl-3-chloro-3-oxopropanoate (1.1 equiv.) was slowly added. The reaction was stirred for 14 h at room temperature. The reaction mixture was quenched with water. The organic layer was separated, and the aqueous layer was extracted three times with EtOAc. The combined organic layers were washed with brine, dried with anhydrous sodium sulfate, filtered, and concentrated under reduced pressure. The residue was purified by silica gel flash chromatography for product isolation.

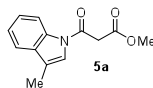

**Methyl 3-(3-methyl-1H-indol-1-yl)-3-oxopropanoate (5a)**: The general procedure was followed using sodium hydride (1.90 g, 47.7 mmol), 3-methyl-1H-indole (5.00 g, 38.1 mmol), methyl-3-chloro-3-oxopropanoate (4.9 mL, 45.7 mmol), and THF (50 mL). After 14 h, the reaction was quenched, and column chromatography (20% EtOAc/Hex, R<sub>f</sub> 0.26 and R<sub>f</sub> 0.15 for keto and enol tautomers) afforded **5a** as a light brown solid (6.44 g, 73%). [m.p. 49-51°C] <sup>1</sup>H NMR (300 MHz, CDCl<sub>3</sub>) δ 8.43 (d, J = 7.1 Hz, 1H),

7.52 – 7.47 (m, 1H), 7.41 – 7.28 (m, 2H), 7.10 (s, 1H), 3.92 (s, 2H), 3.79 (s, 3H), 2.27 (s,  $J = 1.3$  Hz, 3H).  $^{13}\text{C NMR}$  (75 MHz,  $\text{CDCl}_3$ )  $\delta$  166.8, 163.4, 136.0, 131.5, 125.5, 124.0, 121.4, 119.7, 118.9, 116.7, 52.9, 43.6, 9.7. **IR:** 3051.9 (w), 2937.6 (w), 1747.0 (s), 1685.1 (s), 1604.1 (w), 1447.0 (s), 1375.5 (s), 1232.6 (m), 1070.7 (m), 913.5 (m), 732.6 (s)  $\text{cm}^{-1}$ . **HRMS (ESI)  $M/Z^+$  Calc.** 231.0895, Obs. 231.0895.

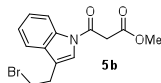

**Methyl 3-(3-(2-bromoethyl)-1H-indol-1-yl)-3-oxopropanoate (5b):**<sup>1</sup> A mixture of potassium carbonate (0.100 g, 0.724 mmol) and 3-(2-bromoethyl)-1H-indole (0.250 g, 1.1 mmol), methyl-3-chloro-3-oxopropanoate (0.21 mL, 1.95 mmol) and acetonitrile (13 mL) were heated to reflux. After 16 h, the reaction mixture was cooled, filtered and dried *in vacuo*. The residue was dissolved in EtOAc/Hex (1:2.5). The organic layer was separated, and the aqueous layer was extracted three times with EtOAc. The combined organic layers were dried with anhydrous sodium sulfate, filtered, and concentrated. Column chromatography (20% EtOAc/Hex,  $R_f$  0.35) afforded **5b** as a yellow-brown solid (0.290 g, 81%). [**m.p.** 68–70°C]  $^1\text{H NMR}$  (300 MHz,  $\text{CDCl}_3$ )  $\delta$  8.41 (d,  $J = 7.8$  Hz, 1H), 7.47 (d,  $J = 7.6$  Hz, 1H), 7.40 – 7.24 (m, 2H), 7.22 (s, 1H), 3.92 (s, 2H), 3.76 (s, 3H), 3.61 (t,  $J = 7.2$  Hz, 2H), 3.22 (t,  $J = 7.2$  Hz, 2H).  $^{13}\text{C NMR}$  (75 MHz,  $\text{CDCl}_3$ )  $\delta$  166.5, 163.5, 135.7, 129.8, 125.6, 123.9, 122.1, 120.4, 118.4, 116.7, 52.7, 43.3, 31.1, 28.5. **IR:** 3091.7 (w), 2940.7 (w), 2878.8 (w), 1760.1 (s), 1657.8 (s), 1615.6 (s), 1535.5 (s), 1440.9 (s), 1239.4 (s), 1191.4 (s), 1040.8 (m), 820.8 (m), 777.4 (m)  $\text{cm}^{-1}$ . **HRMS (ESI)  $M/Z^+$  Calc.** 323.0157, Obs. 323.0162.

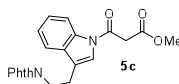

**Methyl 3-(3-(2-(1,3-dioxoisindolin-2-yl)ethyl)-1H-indol-1-yl)-3-oxopropanoate (5c):** The general procedure was followed using sodium hydride (0.459 g, 11.5 mmol), 2-(2-(1H-indol-3-yl)ethyl)isindoline-1,3-dione<sup>2</sup> (3.01 g, 10.4 mmol), methyl-3-chloro-3-oxopropanoate (1.4 mL, 13.0 mmol), and THF (90 mL). After 16 h, the reaction was quenched, and column chromatography (30% EtOAc/Hex,  $R_f$  0.17) afforded **5c** as a white solid (1.69 g, 42%). [**m.p.** 138–140°C]  $^1\text{H NMR}$  (300 MHz,  $\text{CDCl}_3$ )  $\delta$  8.41 (d,  $J = 7.7$  Hz, 1H), 7.88 – 7.77 (m, 2H), 7.75 – 7.67 (m, 2H), 7.64 (d,  $J = 7.7$  Hz, 1H), 7.40 – 7.27 (m, 3H), 4.04 (t,  $J = 7.2$  Hz, 2H), 3.96 (s, 2H), 3.78 (s, 3H), 3.10 (t,  $J = 7.4$  Hz, 2H).  $^{13}\text{C NMR}$  (75 MHz,  $\text{CDCl}_3$ )  $\delta$  171.0, 168.3, 167.2, 166.7, 163.7, 136.0, 134.1, 131.9, 130.4, 125.7, 124.2, 123.3, 121.9, 120.0, 118.9, 116.8, 52.9, 52.8, 43.4, 40.5, 37.2, 24.1. **IR:** 2937.6 (w), 1742.2 (s), 1703.2 (s), 1691.8 (s), 1599.3 (w), 1456.5 (m), 1383.6 (m), 1329.9 (m), 1210.0 (m), 1153.5 (s), 1008.8 (m), 923.1 (w), 719.7 (s)  $\text{cm}^{-1}$ . **HRMS (ESI)  $M/Z^+$  Calc.** 390.1216, Obs. 390.1213.

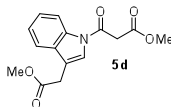

**Methyl 3-(3-(2-methoxy-2-oxoethyl)-1H-indol-1-yl)-3-oxopropanoate (5d):** The general procedure was followed using sodium hydride (0.702 g, 17.6 mmol), methyl 2-(1H-indol-3-yl)acetate (3.00 g, 15.9 mmol), methyl-3-chloro-3-oxopropanoate (2.0 mL, 18.6 mmol), and THF (60 mL). After 16 h, the reaction was quenched, and column chromatography (30% EtOAc/Hex,  $R_f$  0.24) afforded **5d** as a dark brown oil (3.55 g, 77%).  $^1\text{H NMR}$  (300 MHz,  $\text{CDCl}_3$ )  $\delta$  8.43 (d,  $J = 8.0$  Hz, 1H), 7.57 – 7.49 (m, 1H), 7.43 – 7.27 (m, 3H), 3.96 (s, 2H), 3.79 (s, 3H), 3.73 (s, 2H), 3.72 (s, 3H).  $^{13}\text{C NMR}$  (75 MHz,  $\text{CDCl}_3$ )  $\delta$  171.0, 166.6, 163.6, 135.8, 130.1, 125.8, 124.2, 123.1, 118.9, 116.8, 116.0, 52.8, 52.2, 43.4, 30.6. **IR:** 3009.3 (w), 2952.1 (w),

1737.4 (s), 1703.2 (s), 1595.1 (m), 1366.0 (s), 1265.7 (m), 1204.7 (s), 1148.4 (s), 1015.7 (m), 909.4 (m), 728.3 (s)  $\text{cm}^{-1}$ . **HRMS (ESI)**  $M/Z^+$  Calc. 289.0950, Obs. 289.0945.

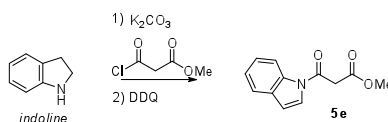

**Methyl 3-(1H-indol-1-yl)-3-oxopropanoate (5e):** Following a modification of Kerr's reported procedure,<sup>3</sup> indoline (4.0 g, 33.56 mmol) was dissolved in THF (70 mL) in a round bottom flask equipped with a magnetic stir bar.  $\text{K}_2\text{CO}_3$  (9.28 g, 67.14 mmol) was added and the mixture was cooled to  $0^\circ\text{C}$ . Methyl malonyl chloride (3.977 mL, 37.09 mmol) was added dropwise with rapid stirring. Formation of white precipitate was immediately observed. After 30 min, the reaction mixture was filtered, and the solvent was removed under reduced pressure to yield the indoline  $\beta$ -amide ester, which was used without purification.

In a dry round bottom flask equipped with a reflux condenser, the resulting  $\beta$ -amide ester (4.26 g, 19.43 mmol) was dissolved in dry toluene (55 mL), and DDQ (5.28 g, 23.26 mmol) was added. The reaction mixture was heated to a reflux for 12 hours. The reaction was cooled to room temperature, diluted with EtOAc, washed with water and brine and dried over anhydrous  $\text{MgSO}_4$ . The solvent was removed *in vacuo* and purification of the crude reaction mixture by flash column chromatography (15% EtOAc/Hex,  $R_f$  0.35) yielded **5e** as a yellow-brown oil (2.72 g, 37.3% over the two steps).  **$^1\text{H NMR}$**  (300 MHz,  $\text{CDCl}_3$ )  $\delta$  8.44 (d,  $J = 8.1$  Hz, 1H), 7.56 – 7.51 (m, 1H), 7.38 – 7.23 (m, 3H), 6.61 (dd,  $J = 3.8, 0.8$  Hz, 1H), 3.91 (s, 2H), 3.74 (s, 3H).  **$^{13}\text{C NMR}$**  (75 MHz,  $\text{CDCl}_3$ )  $\delta$  166.5, 163.8, 135.4, 130.2, 125.1, 124.5, 123.9, 120.7, 116.3, 109.8, 52.6, 43.1. **IR:** 3109.7 (w), 3152.9 (w), 3036.6 (w), 2953.6 (w), 2850.7 (w), 1737.9 (m), 1703.1 (s), 1691.8 (m), 1529.04 (w), 1472.2 (w), 1450.6 (m), 1383.1 (m), 1346.9 (s), 1261.2 (m), 1204.9 (s), 1150.2 (s), 1015.7 (m), 925.7 (m), 747.3 (s), 715.2 (m), 689.3 (m)  $\text{cm}^{-1}$ . **HRMS (ESI)**  $M/Z^+$  Calc. 217.0739, Obs. 217.0738.

## B. Formation of the Diazo Compounds

The  $\beta$ -amide ester (1.0 equiv.) was dissolved in acetonitrile. Triethylamine (1.2 equiv.) was added to the reaction mixture and stirred for 10 min. Tosyl azide (1.2 equiv) was placed in the reaction flask. The mixture was stirred at room temperature for 12 h and concentrated under reduced pressure. The resulting residue was purified by silica gel flash chromatography to afford the diazo compound.

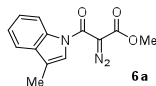

**Methyl 2-diazo-3-(3-methyl-1H-indol-1-yl)-3-oxopropanoate (6a):** The general procedure was followed using methyl 3-(3-methyl-1H-indol-1-yl)-3-oxopropanoate (2.71 g, 11.7 mmol), triethylamine (2.0 mL, 14.4 mmol), tosyl azide (2.81 g, 14.2 mmol), and acetonitrile (30 mL). After 12 h, the reaction mixture was concentrated, and column chromatography (20% EtOAc/Hex,  $R_f$  0.41) afforded **6a** as a yellow solid (2.79 g, 93%). [**m.p.** 74–76 $^\circ\text{C}$ ]  **$^1\text{H NMR}$**  (300 MHz,  $\text{CDCl}_3$ )  $\delta$  8.17 (d,  $J = 8.6$  Hz, 1H), 7.51 – 7.47 (m, 1H), 7.39 – 7.26 (m, 2H), 7.11 (s, 1H), 3.85 (s, 3H), 2.28 (s, 3H).  **$^{13}\text{C NMR}$**  (75 MHz,  $\text{CDCl}_3$ )  $\delta$  161.5, 158.9, 136.0, 131.7, 124.8, 123.7, 123.3, 118.9, 117.7, 115.7, 69.7, 52.6, 9.7. **IR:** 3047.1 (w), 2956.6 (w), 2918.5 (w), 2132.7 (s), 1708.9 (s), 1651.7 (s), 1601.0 (m), 1466.0 (s), 1349.6 (s), 1302.9 (s), 1254.3 (s), 1127.9 (s), 1046.9 (s), 865.9 (m), 732.7 (s)  $\text{cm}^{-1}$ . **HRMS (ESI)**  $M/Z^+$  Calc. 257.0800, Obs. 257.0805.

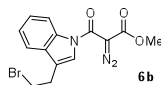

**Methyl 3-(3-(2-bromoethyl)-1*H*-indol-1-yl)-2-diazo-3-oxopropanoate (6b):** The general procedure was followed using methyl 3-(3-(2-bromoethyl)-1*H*-indol-1-yl)-3-oxopropanoate (0.110 g, 0.339 mmol), triethylamine (0.0412 g, 0.407 mmol), tosyl azide (0.080 g, 0.407 mmol), and acetonitrile (10 mL). After 16 h, the reaction mixture was concentrated, and column chromatography (20% EtOAc/Hex,  $R_f$  0.50) afforded **6b** as a yellow oil (0.104 g, 88%).  $^1\text{H NMR}$  (300 MHz,  $\text{CDCl}_3$ )  $\delta$  8.15 (d,  $J = 8.0$  Hz, 1H), 7.47 (d,  $J = 7.6$  Hz, 1H), 7.36 – 7.23 (m, 2H), 7.22 (s, 1H), 3.81 (s, 3H), 3.61 (t,  $J = 7.3$  Hz, 2H), 3.23 (t,  $J = 7.2$  Hz, 2H).  $^{13}\text{C NMR}$  (75 MHz,  $\text{CDCl}_3$ )  $\delta$  161.2, 159.1, 136.0, 130.1, 125.0, 124.2, 123.8, 118.7, 118.5, 115.8, 70.1, 52.7, 31.2, 28.7. **IR:** 3018.6 (w), 2947.1, (w), 2142.0 (s), 1732.7 (s), 1656.5 (s), 1604.1 (w), 1451.7 (s), 1380.4 (s), 1306.8 (s), 1251.7 (m), 1056.4 (m), 861.2 (w), 734.3 (s), 708.8 (m)  $\text{cm}^{-1}$ . **HRMS (ESI) M/Z+ Calc.** 349.0062, Obs. 349.0061.

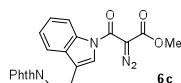

**Methyl 2-diazo-3-(3-(2-(1,3-dioxoisindolin-2-yl)ethyl)-1*H*-indol-1-yl)-3-oxopropanoate (6c):** The general procedure was followed using methyl 3-(3-(2-(1,3-dioxoisindolin-2-yl)ethyl)-1*H*-indol-1-yl)-3-oxopropanoate (1.48 g, 3.78 mmol), triethylamine (700  $\mu\text{L}$ , 5.02 mmol), tosyl azide (0.896 g, 4.54 mmol), and acetonitrile (20 mL). After 18 h, the reaction mixture was concentrated, and column chromatography (40% EtOAc/Hex,  $R_f$  0.44) afforded **6c** as a yellow-brown solid (1.49 g, 95%). [**m.p.** 98-100°C]  $^1\text{H NMR}$  (300 MHz,  $\text{CDCl}_3$ )  $\delta$  8.18 – 8.13 (m, 1H), 7.86 – 7.80 (m, 2H), 7.74 – 7.64 (m, 3H), 7.37 – 7.27 (m, 2H), 7.23 (s, 1H), 4.00 (t,  $J = 6.0$  Hz, 2H), 3.81 (s, 3H), 3.10 (t,  $J = 6.0$  Hz, 2H).  $^{13}\text{C NMR}$  (75 MHz,  $\text{CDCl}_3$ ) (Rotamers!!!)  $\delta$  168.2, 161.2, 159.2, 136.1, 133.9, 133.8, 132.1, 130.5, 125.0, 124.1, 123.9, 123.2, 123.1, 122.1, 122.0, 119.4, 119.0, 118.8, 118.0, 115.8, 112.4, 111.1, 69.8, 52.7, 38.5, 37.4, 24.4, 24.2. **IR:** 3032.8 (s), 2942.4 (w), 2137.5 (s), 1708.4 (s), 1642.2 (m), 1604.1 (w), 1451.7 (w), 1379.6 (s), 1306.8 (s), 1256.4 (m), 1170.7 (m), 1095.3 (m), 1004.0 (w), 861.2 (m), 732.4 (s)  $\text{cm}^{-1}$ . **HRMS (ESI) M/Z+ Calc.** 416.1121, Obs. 416.1105.

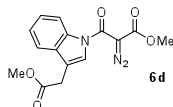

**Methyl 2-diazo-3-(3-(2-methoxy-2-oxoethyl)-1*H*-indol-1-yl)-3-oxopropanoate (6d):** The general procedure was followed using methyl 3-(3-(2-methoxy-2-oxoethyl)-1*H*-indol-1-yl)-3-oxopropanoate (1.49 g, 5.16 mmol), triethylamine (880  $\mu\text{L}$ , 6.31 mmol), tosyl azide (1.22 g, 6.19 mmol), and acetonitrile (20 mL). After 18 h, the reaction mixture was concentrated, and column chromatography (40% EtOAc/Hex,  $R_f$  0.43) afforded **6d** as a brown solid (1.36 g, 83%). [**m.p.** 77-79°C]  $^1\text{H NMR}$  (300 MHz,  $\text{CDCl}_3$ )  $\delta$  8.17 (d,  $J = 7.8$  Hz, 1H), 7.52 (d,  $J = 7.7$  Hz, 1H), 7.41 – 7.26 (m, 3H), 3.84 (s, 3H), 3.73 (s, 2H), 3.72 (s, 3H).  $^{13}\text{C NMR}$  (75 MHz,  $\text{CDCl}_3$ )  $\delta$  171.1, 161.3, 159.2, 135.9, 130.3, 125.2, 125.1, 123.9, 118.9, 115.8, 114.1, 70.1, 52.7, 52.1, 30.7. **IR:** 2999.5 (w), 2961.4 (w), 2137.5 (s), 1721.8 (s), 1637.44 (s), 1599.3 (w), 1446.9 (s), 1364.2 (s), 1305.1 (s), 1253.8 (s), 1139.6 (s), 1051.6 (w), 870.7 (m), 747.9 (s)  $\text{cm}^{-1}$ . **HRMS (ESI) M/Z+ Calc.** 315.0855, Obs. 315.0860.

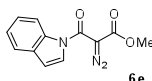

**Methyl 2-diazo-3-(1*H*-indol-1-yl)-3-oxopropanoate (6e):** The general procedure was followed using methyl 3-(1*H*-indol-1-yl)-3-oxopropanoate (1.42 g, 6.54 mmol), triethylamine (1.82 mL, 13.07 mmol), tosyl azide (1.547 g, 7.845 mmol), and acetonitrile (30 mL). After 12 h, the reaction mixture was concentrated, and column chromatography (10% EtOAc/Hex,  $R_f$  0.35) afforded **6e** as a yellow oil (1.49 g, 93.7%).  $^1\text{H}$

**NMR** (300 MHz, CDCl<sub>3</sub>) δ 8.22 – 8.16 (m, 1H), 7.59 – 7.53 (m, 1H), 7.40 – 7.23 (m, 3H), 6.61 (dd, *J* = 3.8, 0.7 Hz, 1H), 3.83 (s, 3H). **<sup>13</sup>C NMR** (75 MHz, CDCl<sub>3</sub>) δ 161.3, 159.5, 135.7, 130.6, 127.4, 126.7, 124.7, 123.8, 120.9, 115.5, 108.2, 52.7. **IR**: 3162.8 (w), 3053.2 (w), 2953.6 (w), 2140.3 (s), 1710.8 (s), 1721.3 (s), 1657.8 (s), 1649.7 (s), 1529.0 (w), 1451.1 (s), 1380.5 (s), 1342.4 (s), 1298.4 (s), 1244.9 (m), 1139.5 (m), 1121.6 (m), 1090.6 (m), 1067.0 (m), 945.5 (w), 883.1 (m), 859.7 (m), 746.5 (s), 640.3 (w) cm<sup>-1</sup>. **HRMS (ESI) M/Z+** Calc. 243.0644, Obs. 243.0640.

### C. Synthesis of the Cyclopropanes

The cyclopropanes were prepared using a modified version of Gonzalez-Bobes' protocol:<sup>4</sup> A round bottom flask was charged with Rh<sub>2</sub>esp<sub>2</sub> (0.1 mol%) and a magnetic stir bar. DCM (2.0 mL) was added to the flask. The reaction vessel was cooled to 0 °C, and the corresponding alkene (1.0 equiv) was added. After 10 min, the diazo reagent (1.3 equiv.) was dissolved in DCM (5 mL) and syringed into the reaction mixture. After 10 min, the ice bath was removed and the reaction proceeded at room temperature. Upon completion (monitored by TLC) or 12 h of reactivity, the reaction was quenched with saturated thiourea and stirred for 30 min. The organic layer was separated, and the aqueous layer extracted three times with DCM. The combined organic layers were washed with brine, dried with anhydrous sodium sulfate, filtered, concentrated under reduced pressure. The residue was purified by silica gel flash chromatography.

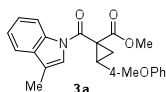

**Methyl 2-(4-methoxyphenyl)-1-(3-methyl-1H-indole-1-carbonyl) cyclopropane carboxylate (3a)**: The general procedure was followed using 4-methoxystyrene (0.201 g, 1.49 mmol), methyl 2-diazo-3-(3-methyl-1H-indol-1-yl)-3-oxopropanoate (0.500 g, 1.94 mmol), Rh<sub>2</sub>esp<sub>2</sub> (1.5 mg, 1.98 μmol) and DCM (8 mL). After 12 h, the reaction was quenched, and column chromatography (20% EtOAc/Hex, *R<sub>f</sub>* 0.52) afforded **3a** as a pale yellow solid (0.328 g, 60%). [*m.p.* 110-112 °C] **<sup>1</sup>H NMR** (300 MHz, CDCl<sub>3</sub>) δ 8.45 (d, *J* = 8.0 Hz, 1H), 7.61-7.45 (m, 1H), 7.44 – 7.26 (m, 5H), 6.90 – 6.83 (m, 2H), 3.81 (s, 3H), 3.41 (t, *J* = 4 Hz, 1H), 3.41 (s, 3H), 2.40 (dd, *J* = 8.3, 5.2 Hz, 1H), 2.28 (s, 3H), 1.82 (dd, *J* = 9.3, 5.2 Hz, 1H). **<sup>13</sup>C NMR** (75 MHz, CDCl<sub>3</sub>) δ 168.0, 165.8, 158.9, 136.0, 131.5, 130.2, 126.1, 125.4, 123.8, 121.5, 119.2, 118.9, 116.5, 113.6, 55.2, 52.8, 39.5, 31.1, 18.8, 9.8. **IR**: 3050.0 (w), 2914.3 (m), 1742.9 (m), 1681.0 (s), 1600.0 (m), 1514.29 (m), 1450.0 (s), 1346.3 (s), 1246.8 (s), 1176.5 (s), 1028.6 (s), 838.1 (s), 748.2 (s) cm<sup>-1</sup>. **HRMS (ESI) M/Z+** Calc. 363.1471, Obs. 363.1471.

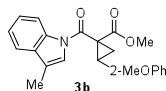

**Methyl 2-(2-methoxyphenyl)-1-(3-methyl-1H-indole-1-carbonyl)cyclopropane carboxylate (3b)**: The general procedure was followed using 1-methoxy-2-vinylbenzene (0.095 g, 0.709 mmol), methyl 2-diazo-3-(3-methyl-1H-indol-1-yl)-3-oxopropanoate (0.210 g, 0.816 mmol), Rh<sub>2</sub>esp<sub>2</sub> (1.0 mg, 1.31 μmol), and DCM (10 mL). After 12 h, the reaction was quenched, and column chromatography (20% EtOAc/Hex, *R<sub>f</sub>* 0.35) afforded **3b** as a pale yellow solid (0.196 g, 76%). [*m.p.* 106-108 °C] **<sup>1</sup>H NMR** (300 MHz, CDCl<sub>3</sub>) δ 8.54 (d, *J* = 7.9 Hz, 1H), 7.57 – 7.27 (m, 6H), 7.04 – 6.95 (m, 1H), 6.91 (d, *J* = 8.2 Hz, 1H), 3.88 (s, 3H), 3.45 (s, 3H), 3.45 (t, 1H), 2.35 (dd, *J* = 7.9, 4.5 Hz, 1H), 2.32 (d, *J* = 1.3 Hz, 3H), 1.97 (dd, *J* = 9.3, 5.0 Hz, 1H). **<sup>13</sup>C NMR** (75 MHz, CDCl<sub>3</sub>) δ 168.4, 165.9, 158.5, 136.0, 131.4, 130.0, 129.7, 128.7, 127.7, 125.0, 123.5, 122.8, 122.2, 120.0, 118.6, 118.1, 116.5, 109.9, 66.7, 55.2, 52.4, 38.0, 28.3, 21.5, 19.0, 14.6, 9.7. **IR**: 3059.9 (w), 2983.6 (w), 1720.3 (s), 1658.0 (s), 1441.1 (s), 1338.7 (s), 1233.7 (m), 712.5 (s), 674.4 (m) cm<sup>-1</sup>. **HRMS (ESI) M/Z+** Calc. 363.1471, Obs. 363.1471.

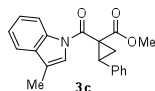

**Methyl 1-(3-methyl-1H-indole-1-carbonyl)-2-phenylcyclopropanecarboxylate (3c):** The general procedure was followed using styrene (0.100 g, 0.960 mmol), methyl 2-diazo-3-(3-methyl-1H-indol-1-yl)-3-oxopropanoate (0.329 g, 1.28 mmol), Rh<sub>2</sub>esp<sub>2</sub> (1.0 mg, 1.32 μmol), and DCM (13 mL). After 12 h, the reaction was quenched, and column chromatography (20% EtOAc/Hex, R<sub>f</sub> 0.60) afforded **3c** as a white solid (0.273 g, 85%). [m.p. 130-132°C] <sup>1</sup>H NMR (300 MHz, CDCl<sub>3</sub>) δ 8.46 (d, *J* = 8.0 Hz, 1H), 7.55 – 7.48 (m, 1H), 7.45 – 7.26 (m, 8H), 3.48 (t, *J* = 8.8 Hz, 1H), 3.40 (s, 3H), 2.46 (dd, *J* = 8.3, 5.2 Hz, 1H), 2.29 (s, 3H), 1.84 (dd, *J* = 9.3, 5.2 Hz, 1H). <sup>13</sup>C NMR (75 MHz, CDCl<sub>3</sub>) δ 167.9, 165.6, 136.0, 134.2, 131.5, 129.1, 128.2, 127.4, 125.4, 123.8, 121.4, 119.2, 118.9, 116.5, 52.8, 39.5, 31.5, 18.5, 9.8. IR: 3037.6 (w), 2951.9 (w), 2918.5 (w), 1732.7 (s), 1692.0 (s), 1446.9 (s), 1390.8 (s), 1348.3 (s), 1208.8 (m), 1051.6 (m), 742.1 (m), 684.9 (m) cm<sup>-1</sup>. HRMS (ESI) M/Z+ Calc. 333.1365, Obs. 333.1367.

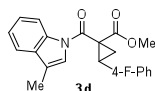

**Methyl 2-(4-fluorophenyl)-1-(3-methyl-1H-indole-1-carbonyl)cyclopropane carboxylate (3d):** The general procedure was followed using 4-fluorostyrene (0.146 g, 1.19 mmol), methyl 2-diazo-3-(3-methyl-1H-indol-1-yl)-3-oxopropanoate (0.356 g, 1.38 mmol), Rh<sub>2</sub>esp<sub>2</sub> (1.6 mg, 2.10 μmol), and DCM (8 mL). After 10 h, the reaction was quenched, and column chromatography (20% EtOAc/Hex, R<sub>f</sub> 0.64) afforded **3d** as a pale green solid (0.273 g, 65%). [m.p. 120-122°C] <sup>1</sup>H NMR (300 MHz, CDCl<sub>3</sub>) δ 8.45 (d, *J* = 8.0 Hz, 1H), 7.52 (d, *J* = 8.3 Hz, 1H), 7.44 – 7.29 (m, 4H), 7.25 (s, 1H), 7.07 – 6.98 (m, 2H), 3.46 (t, *J* = 8.5 Hz, 1H), 3.42 (s, 3H), 2.42 (dd, *J* = 8.2, 5.3 Hz, 1H), 2.29 (s, 3H), 1.84 (dd, *J* = 9.3, 5.3 Hz, 1H). <sup>13</sup>C NMR (75 MHz, CDCl<sub>3</sub>) δ 167.8, 165.4, 163.8, 160.5, 136.0, 131.5, 130.7, 130.0, 125.4, 123.9, 121.3, 119.4, 118.9, 116.5, 115.3, 115.0, 52.9, 39.5, 30.8, 18.7, 9.8. IR: 3010.0 (w), 2947.1 (w), 2904.3 (w), 1727.9 (m), 1685.1 (s), 1518.4 (s), 1456.5 (s), 1399.3 (s), 1337.4 (s), 1215.2 (s), 1146.9 (s), 1051.7 (m), 846.9 (m), 723.1 (s), 608.7 (m) cm<sup>-1</sup>. HRMS (ESI) M/Z+ Calc. 351.1271, Obs. 351.1268.

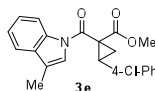

**Methyl 2-(4-chlorophenyl)-1-(3-methyl-1H-indole-1-carbonyl)cyclopropane carboxylate (3e):** The general procedure was followed using 4-chlorostyrene (0.124 g, 0.898 mmol), methyl 2-diazo-3-(3-methyl-1H-indol-1-yl)-3-oxopropanoate (0.250 g, 0.973 mmol), Rh<sub>2</sub>esp<sub>2</sub> (1.5 mg, 1.71 μmol), and DCM (8 mL). After 12 h, the reaction was quenched, and column chromatography (20% EtOAc/Hex, R<sub>f</sub> 0.64) afforded **3e** as a white solid (0.275 g, 83%). [m.p. 129-131°C] <sup>1</sup>H NMR (300 MHz, CDCl<sub>3</sub>) δ 8.46 (d, *J* = 8.0 Hz, 1H), 7.55 – 7.50 (m, 1H), 7.45 – 7.29 (m, 6H), 7.26 (d, *J* = 1.3 Hz, 1H), 3.44 (t, *J* = 6.8 Hz, 1H), 3.44 (s, 3H), 2.43 (dd, *J* = 8.3, 5.3 Hz, 1H), 2.30 (s, 3H), 1.86 (dd, *J* = 9.3, 5.3 Hz, 1H). <sup>13</sup>C NMR (75 MHz, CDCl<sub>3</sub>) δ 167.7, 165.3, 136.0, 133.3, 132.8, 131.5, 130.4, 128.3, 125.4, 123.9, 121.2, 119.4, 118.9, 116.5, 52.9, 39.5, 30.8, 18.6, 9.7. IR: 3010.0 (w), 2951.9 (w), 2913.8 (w), 1727.9 (s), 1691.9 (s), 1485.0 (m), 1451.0 (s), 1389.9 (s), 1347.9 (s), 1218.3 (m), 1156.4 (m), 1080.2 (m), 842.1 (m), 742.1 (m) 708.7 (w) cm<sup>-1</sup>. HRMS (ESI) M/Z+ Calc. 367.0975, Obs. 367.0981.

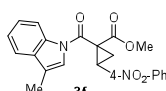

**Methyl 1-(3-methyl-1H-indole-1-carbonyl)-2-(4-nitrophenyl)cyclopropane carboxylate (3f):** The general procedure was followed using 4-nitrostyrene (0.252 g, 1.69 mmol), methyl 2-diazo-3-(3-methyl-1H-indol-1-yl)-3-oxopropanoate (0.505 g, 1.97 mmol), Rh<sub>2</sub>esp<sub>2</sub> (1.2 mg, 1.98 μmol), and DCM (8 mL). After 10 h, the reaction was quenched, and column chromatography (20% EtOAc/Hex, R<sub>f</sub> 0.69) afforded **3f** as a yellow solid (0.325 g, 51%). [m.p. 163-165°C] <sup>1</sup>H NMR (300 MHz, CDCl<sub>3</sub>) δ 8.43 (d, *J* = 7.9 Hz, 1H), 8.24 – 8.17 (m, 2H), 7.58 – 7.50 (m, 3H), 7.45 – 7.30 (m, 2H), 7.21 (s, 1H), 3.54 (t, *J* = 8.8 Hz, 1H), 3.43 (s, 3H), 2.51 (dd, *J* = 8.3, 5.4 Hz, 1H), 2.29 (s, 3H), 1.94 (dd, *J* = 9.2, 5.4 Hz, 1H). <sup>13</sup>C NMR (75 MHz, CDCl<sub>3</sub>) δ 167.5, 164.8, 147.3, 142.0, 136.0, 131.5, 130.0, 125.6, 124.1, 123.4, 120.9, 119.8, 119.0, 116.5, 53.1, 40.0, 30.9, 18.9, 9.8. IR: 3000.0 (w), 2913.8 (w), 2851.9 (w), 1727.9 (m), 1691.2 (s), 1599.3 (m), 1508.9 (s), 1449.8 (s), 1390.3 (s), 1342.9 (s), 1216.9 (s), 1142.1 (m), 1046.9 (m), 856.4 (m), 736.7 (s), 699.2 (m) cm<sup>-1</sup>. HRMS (ESI) M/Z+ Calc. 378.1216, Obs. 378.1208.

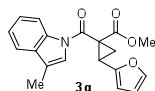

**Methyl 2-(furan-2-yl)-1-(3-methyl-1H-indole-1-carbonyl)cyclopropanecarboxylate (3g):** The general procedure was followed using 2-vinylfuran (0.059 g, 0.627 mmol), methyl 2-diazo-3-(3-methyl-1H-indol-1-yl)-3-oxopropanoate (0.210 g, 0.816 mmol), Rh<sub>2</sub>esp<sub>2</sub> (1.0 mg, 1.31 μmol), and DCM (10 mL). After 12 h, the reaction was quenched, and column chromatography (15% EtOAc/Hex, R<sub>f</sub> 0.35) afforded **3g** as a white solid (0.084 g, 41%). [m.p. 95-97°C] <sup>1</sup>H NMR (300 MHz, CDCl<sub>3</sub>) δ 8.45 (d, *J* = 7.9 Hz, 1H), 7.56 – 7.50 (m, 1H), 7.44 – 7.30 (m, 4H), 6.41 – 6.35 (m, 1H), 6.32 – 6.28 (m, 1H), 3.54 (s, 3H), 3.25 (t, *J* = 8.7 Hz, 1H), 2.34 (dd, *J* = 6.9, 4.2 Hz, 1H), 2.31 (d, *J* = 1.3 Hz, 3H), 1.96 (dd, *J* = 9.5, 5.2 Hz, 1H). <sup>13</sup>C NMR (75 MHz, CDCl<sub>3</sub>) 167.6, 164.9, 149.1, 142.3, 136.0, 131.5, 125.3, 123.9, 121.7, 119.3, 118.8, 116.5, 110.5, 108.8, 52.9, 38.2, 24.7, 18.7, 9.8. IR: 3086.97 (w), 2972.5 (w), 1726.4 (m), 1711.4 (m), 1441.3 (m), 1382.7 (m), 759.9 (s), 663.0 (s) cm<sup>-1</sup>. HRMS (ESI) M/Z+ Calc. 323.1158, Obs. 323.1159.

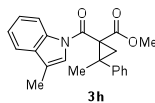

**Methyl 2-methyl-1-(3-methyl-1H-indole-1-carbonyl)-2 phenylcyclopropane carboxylate (3h):** The general procedure was followed using prop-1-en-2-ylbenzene (0.123 g, 1.046 mmol), methyl 2-diazo-3-(3-methyl-1H-indol-1-yl)-3-oxopropanoate (0.350 g, 1.360 mmol), Rh<sub>2</sub>esp<sub>2</sub> (1.0 mg, 1.31 μmol), and DCM (10 mL). After 12 h, the reaction was quenched, and column chromatography (20% EtOAc/Hex, R<sub>f</sub> 0.38) afforded **3h** as a colorless oil (0.225 g, 62%). <sup>1</sup>H NMR (300 MHz, CDCl<sub>3</sub>) δ 8.61 (d, *J* = 7.8 Hz, 0.90), 7.88 – 7.80 (m, 0.16), 7.63 – 7.55 (m, 1.05), 7.54 – 7.28 (m, 8.37), 7.24 – 7.20 (m, 0.51), 3.69 (s, 0.40), 3.46 (d, *J* = 0.8 Hz, 3), 2.67 (d, *J* = 5.5 Hz, 0.14), 2.53 (d, *J* = 5.1 Hz, 1.33), 2.39 (s, 2.99), 2.26 (d, *J* = 1.3 Hz, 0.42), 1.96 (d, *J* = 6.6 Hz, 0.55), 1.85 (d, *J* = 5.1 Hz, 1.03), 1.64 (s, 0.27), 1.55 (s, 2.91). <sup>13</sup>C NMR (75 MHz, CDCl<sub>3</sub>) δ 168.4, 164.9, 140.6, 136.0, 131.5, 128.4, 128.0, 127.8, 127.2, 125.3, 123.8, 122.3, 118.8, 118.7, 116.8, 52.6, 41.9, 38.4, 26.0, 25.7, 9.8. IR: 3080.6 (w), 2939.6 (w), 2896.9 (w), 1724.3 (s), 1657.6 (s), 1421.8 (s), 1382.7 (s), 1267.7 (s), 789.5 (s), 664.3 (s) cm<sup>-1</sup>. HRMS (ESI) M/Z+ Calc. 347.1521, Obs. 347.1516.

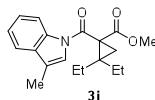

**Methyl 2,2-diethyl-1-(3-methyl-1H-indole-1-carbonyl)cyclopropanecarboxylate (3i):** The general procedure was followed using 3-methylenepentane (0.062 g, 0.747 mmol), methyl 2-diazo-3-(3-methyl-1H-indol-1-yl)-3-oxopropanoate (0.250 g, 0.971 mmol), Rh<sub>2</sub>esp<sub>2</sub> (1.0 mg, 1.31 μmol), and DCM (10 mL). After 12 h, the reaction was quenched, and column chromatography (15% EtOAc/Hex, R<sub>f</sub> 0.35) afforded **3i** as a white solid (0.117 g, 50%). [m.p. 78-80°C] <sup>1</sup>H NMR (300 MHz, CDCl<sub>3</sub>) δ 8.40 (d, *J* = 8.0 Hz, 1H), 7.45 – 7.39 (m, 1H), 7.33 – 7.21 (m, 3H), 3.58 (s, 3H), 2.21 (d, *J* = 1.3 Hz, 3H), 1.97 – 1.73 (m, 3H), 1.62 (dd, *J* = 4.8, 1.2 Hz, 1H), 1.51 (d, *J* = 4.8 Hz, 1H), 0.99 (t, *J* = 7.5 Hz, 3H), 0.91 – 0.71 (m, 4H). <sup>13</sup>C NMR



(75 MHz, CDCl<sub>3</sub>) δ 169.7, 165.7, 135.9, 131.4, 125.0, 123.6, 122.7, 118.6, 118.0, 116.7, 52.6, 41.4, 40.1, 27.4, 26.2, 21.5, 10.7, 10.6, 9.7. **IR:** 3059.7 (w), 2946.2 (m), 1714.5 (s), 1657.6 (s), 1414.8 (s), 1381.3 (s), 1292.4 (s), 1081.2 (s), 728.5 (s), 663.3 (m) cm<sup>-1</sup>. **HRMS (ESI) M/Z+ Calc.** 313.1678, Obs. 313.1683.

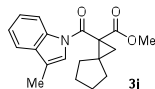

**Methyl 1-(3-methyl-1H-indole-1-carbonyl)spiro[2.4]heptane-1-carboxylate (3j):** The general procedure was followed using methylenecyclopentane (0.098 g, 1.20 mmol), methyl 2-diazo-3-(3-methyl-1H-indol-1-yl)-3-oxopropanoate (0.400 g, 1.55 mmol), Rh<sub>2</sub>esp<sub>2</sub> (1.0 mg, 1.31 μmol), and DCM (10 mL). After 4 h, the reaction was quenched, and column chromatography (15% EtOAc/Hex, R<sub>f</sub> 0.35) afforded **3j** as a colorless oil (0.342 g, 92%). **<sup>1</sup>H NMR** (300 MHz, CDCl<sub>3</sub>) δ 8.52 (s, 1H), 7.55 – 7.48 (m, 1H), 7.43 – 7.27 (m, 2H), 7.10 (s, 1H), 3.65 (s, 3H), 2.31 (s, 3H), 2.24 – 1.98 (m, 2H), 1.90 – 1.62 (m, 7H), 1.46 – 1.33 (m, 1H). **<sup>13</sup>C NMR** (75 MHz, CDCl<sub>3</sub>) δ 170.1, 165.6, 135.7, 131.2, 124.9, 123.4, 121.9, 118.5, 118.3, 116.3, 52.2, 40.0, 39.2, 34.4, 34.2, 33.6, 31.6, 31.3, 29.0, 25.5, 25.5, 25.0, 22.4, 20.4, 13.9, 9.5. **IR:** 3040.0 (w), 2892.6 (w), 1765.3 (s), 1711.65 (s), 1439.1 (s), 1359.7 (s), 715.5 (s), 662.9 (m) cm<sup>-1</sup>. **HRMS (ESI) M/Z+ Calc.** 311.1521, Obs. 311.1515.

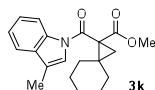

**Methyl 1-(3-methyl-1H-indole-1-carbonyl)spiro[2.5]octane-1-carboxylate (3k):** The general procedure was followed using methylenecyclohexane (0.068 g, 0.709 mmol), methyl 2-diazo-3-(3-methyl-1H-indol-1-yl)-3-oxopropanoate (0.210 g, 0.816 mmol), Rh<sub>2</sub>esp<sub>2</sub> (1.0 mg, 1.31 μmol), and DCM (10 mL). After 6 h, the reaction was quenched, and column chromatography (15% EtOAc/Hex, R<sub>f</sub> 0.40) afforded **3k** as a white solid (0.160 g, 69%). [m.p. 120-122°C]. **<sup>1</sup>H NMR** (300 MHz, CDCl<sub>3</sub>) δ 8.49 (d, *J* = 5.7 Hz, 1H), 7.60 – 7.48 (m, 1H), 7.44 – 7.27 (m, 2H), 7.14 (s, 1H), 3.65 (s, 3H), 2.32 (d, *J* = 1.2 Hz, 3H), 2.18 (d, *J* = 12.5 Hz, 1H), 1.92 – 1.21 (m, 10H), 1.05 – 0.94 (m, 1H). **<sup>13</sup>C NMR** (75 MHz, CDCl<sub>3</sub>) δ 169.5, 165.7, 135.8, 131.4, 125.0, 123.5, 122.5, 118.6, 118.2, 116.5, 52.5, 41.1, 37.5, 33.9, 28.7, 26.4, 25.8, 25.6, 25.5, 9.7. **IR:** 2998.1 (w), 2878.5 (w), 1720.8 (m), 1711.4 (m), 1439.8 (m), 1340.7 (m), 1138.1 (w), 759.5 (s), 674.3 (s) cm<sup>-1</sup>. **HRMS (ESI) M/Z+ Calc.** 325.1678, Obs. 325.1681.

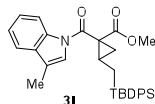

**Methyl 2-((tert-butylidiphenylsilyl)methyl)-1-(3-methyl-1H-indole-1-carbonyl)cyclopropanecarboxylate (3l):** The general procedure was followed using allyl(*tert*-butyl)diphenylsilane (0.294 g, 1.05 mmol), methyl 2-diazo-3-(3-methyl-1H-indol-1-yl)-3-oxopropanoate (0.350 g, 1.36 mmol), Rh<sub>2</sub>esp<sub>2</sub> (1.0 mg, 1.31 μmol), and DCM (8 mL). After 6 h, the reaction was quenched, and column chromatography (20% EtOAc/Hex, R<sub>f</sub> 0.45) afforded **3l** as a white solid (0.332 g, 62%). [m.p. 127 – 129°C] **<sup>1</sup>H NMR** (300 MHz, CDCl<sub>3</sub>) δ 8.39 (d, *J* = 7.9 Hz, 1H), 7.76 – 7.64 (m, 4H), 7.57 – 7.23 (m, 9H), 7.17 (s, 1H), 3.69 (s, 3H), 2.28 (s, 3H), 1.74 – 1.66 (m, 1H), 1.57 – 1.40 (m, 2H), 1.31 (dd, *J* = 8.5, 5.5 Hz, 2H), 1.13 (s, 9H). **<sup>13</sup>C NMR** (75 MHz, CDCl<sub>3</sub>) δ 169.6, 166.3, 136.0, 136.9, 135.8, 134.1, 133.8, 131.4, 129.3, 129.2, 127.7, 127.6, 125.1, 123.6, 121.6, 118.7, 118.6, 116.4, 52.7, 37.3, 27.8, 25.7, 23.0, 18.1, 9.7, 8.0. **IR:** 3066.2 (w), 2932.8 (m), 2842.4 (m), 1728.1 (s), 1692.7 (s), 1451.6 (s), 1389.5 (m), 1348.5 (s), 1213.1 (m), 1153.3 (m), 1106.0 (m), 818.3 (w), 749.1 (m), 701.5 (s) cm<sup>-1</sup>. **HRMS (ESI) M/Z+ Calc.** 509.2386, Obs. 509.2388.

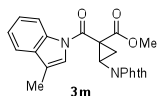

**Methyl 2-(1,3-dioxoisindolin-2-yl)-1-(3-methyl-1H-indole-1-carbonyl)cyclopropane carboxylate (3m):** The general procedure was followed using N-vinyl-phthalimide (0.155 g, 897  $\mu\text{mol}$ ), methyl 2-diazo-3-(3-methyl-1H-indol-1-yl)-3-oxopropanoate (0.300 g, 1.17 mmol),  $\text{Rh}_2\text{esp}_2$  (1.1 mg, 1.45  $\mu\text{mol}$ ), and DCM (8 mL). After 12 h, the reaction was quenched, and column chromatography (20% EtOAc/Hex,  $R_f$  0.20) afforded **3m** as a white solid (0.247 g, 68%). [m.p. 88-90°C] *Diastereomeric Ratio:* (2.5:1).  $^1\text{H NMR}$  (300 MHz,  $\text{CDCl}_3$ )  $\delta$  8.43 (d,  $J = 7.4$  Hz, 0.83), 8.22 (d,  $J = 6.1$  Hz, 0.27), 7.98 (s, 1.00), 7.83 (dt,  $J = 6.9, 3.5$  Hz, 2.19), 7.76 – 7.66 (m, 2.80), 7.66 – 7.58 (m, 1.00), 7.51 – 7.45 (m, 1.16), 7.42 – 7.18 (m, 3.88), 4.16 (dd,  $J = 9.2, 6.8$  Hz, 0.23), 3.71 (s, 1.11), 3.67 (dd,  $J = 8.0, 6.5$  Hz, 1.18), 3.57 (s, 3.00), 3.47 (t,  $J = 6.5$  Hz, 0.63), 2.59 (t,  $J = 6.4$  Hz, 1.00), 2.35 – 2.27 (m, 4.00), 2.23 (s, 1.45), 2.17 (dd,  $J = 9.2, 6.2$  Hz, 0.60).  $^{13}\text{C NMR}$  (75 MHz,  $\text{CDCl}_3$ )  $\delta$  169.7, 168.2, 168.0, 167.8, 164.0, 136.0, 134.3, 134.2, 134.2, 131.8, 131.4, 131.3, 125.3, 125.1, 124.0, 123.8, 123.6, 123.4, 122.5, 122.1, 119.0, 118.9, 118.8, 118.7, 116.5, 116.3, 53.4, 53.3, 48.8, 35.9, 33.9, 20.6, 17.4, 9.8, 9.6. **IR:** 3056.7 (w), 2951.9 (w), 1770.8 (w), 1720.5 (s), 1680.3 (s), 1604.1 (w), 1442.2 (m), 1389.3 (s), 1308.8 (s), 1223.1 (s), 1070.7 (m), 970.7 (w), 865.9 (w), 714.8 (s)  $\text{cm}^{-1}$ . **HRMS (ESI) M/Z+ Calc.** 402.1216, Obs. 402.1213.

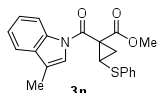

**Methyl 1-(3-methyl-1H-indole-1-carbonyl)-2-(phenylthio)cyclopropanecarboxylate (3n):** The general procedure was followed using phenyl(vinyl)sulfane (0.311 g, 2.29 mmol), methyl 2-diazo-3-(3-methyl-1H-indol-1-yl)-3-oxopropanoate (0.722 g, 2.81 mmol),  $\text{Rh}_2\text{esp}_2$  (1.8 mg, 2.4  $\mu\text{mol}$ ), and DCM (13 mL). After 12 h, the reaction was quenched, and column chromatography (20% EtOAc/Hex,  $R_f$  0.40) afforded **3n** as a colorless oil (0.125 g, 15%).  $^1\text{H NMR}$  (300 MHz,  $\text{CDCl}_3$ )  $\delta$  8.44 (d,  $J = 7.9$  Hz, 1H), 7.55 – 7.47 (m, 3H), 7.43 – 7.28 (m, 4H), 7.23 – 7.16 (m, 2H), 3.56 (dd,  $J = 7.5, 5.6$  Hz, 1H), 3.52 (s, 3H), 2.25 (d,  $J = 1.3$  Hz, 3H), 2.15 (dd,  $J = 7.3, 5.7$  Hz, 1H), 1.92 (dd,  $J = 9.2, 5.7$  Hz, 1H).  $^{13}\text{C NMR}$  (75 MHz,  $\text{CDCl}_3$ )  $\delta$  167.3, 164.6, 135.9, 135.4, 131.6, 129.0, 127.7, 126.0, 125.7, 124.0, 121.1, 119.7, 119.0, 116.6, 53.1, 39.8, 28.2, 20.0, 9.7. **IR:** 3080.6 (w), 2939.6 (w), 2896.9 (w), 1724.3 (s), 1657.6 (s), 1421.8 (s), 1382.7 (s), 1267.7 (s), 789.5 (s), 664.3 (s)  $\text{cm}^{-1}$ . **HRMS (ESI) M/Z+ Calc.** 365.1079, Obs. 365.1083.

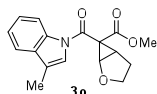

**Methyl 6-(3-methyl-1H-indole-1-carbonyl)-2-oxabicyclo[3.1.0]hexane-6-carboxylate (3o):** The general procedure was followed using 2,3-dihydrofuran (0.073 g, 1.05 mmol), methyl 2-diazo-3-(3-methyl-1H-indol-1-yl)-3-oxopropanoate (0.350 g, 1.36 mmol),  $\text{Rh}_2\text{esp}_2$  (1.0 mg, 1.31  $\mu\text{mol}$ ), and DCM (9 mL). After 10 h, the reaction was quenched and column chromatography (20% EtOAc/Hex,  $R_f$  0.30) afforded **3o** as a brown solid (0.235 g, 75%). [m.p. 83-85°C]  $^1\text{H NMR}$  (300 MHz,  $\text{CDCl}_3$ )  $\delta$  7.72 – 7.63 (m, 1H), 7.56 – 7.49 (m, 2H), 7.31 – 7.17 (m, 2H), 6.27 (d,  $J = 6.2$  Hz, 1H), 4.19 – 4.10 (m, 1H), 4.05 – 3.97 (m, 1H), 3.96 – 3.85 (m, 1H), 3.72 (s, 3H), 2.35 (s, 3H), 2.25 – 2.16 (m, 2H).  $^{13}\text{C NMR}$  (75 MHz,  $\text{CDCl}_3$ )  $\delta$  164.1, 156.4, 135.8, 130.3, 125.0, 123.2, 121.7, 118.8, 115.2, 114.2, 108.3, 89.2, 67.1, 50.9, 47.3, 32.0, 9.5. **IR:** 2951.9 (w), 2880.5 (w), 1740.9 (s), 1691.3 (s), 1599.3 (w), 1449.2 (s), 1348.9 (s), 1105.2 (s), 1064.3 (s), 995.6 (s), 734.8 (s)  $\text{cm}^{-1}$ . **HRMS (ESI) M/Z+ Calc.** 299.1158, Obs. 299.1155.

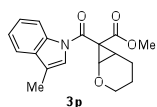

**Methyl 7-(3-methyl-1*H*-indole-1-carbonyl)-2-oxabicyclo[4.1.0]heptane-7-carboxylate (3p):** The general procedure was followed using 2,3-dihydropyran (95  $\mu$ L, 1.04 mmol), methyl 2-diazo-3-(3-methyl-1*H*-indol-1-yl)-3-oxopropanoate (0.350 g, 1.36 mmol), Rh<sub>2</sub>esp<sub>2</sub> (1.0 mg, 1.31  $\mu$ mol), and DCM (8 mL). After 12 h, the reaction was quenched, and column chromatography (20% EtOAc/Hex, R<sub>f</sub> 0.40) afforded **3p** as a pale red solid (0.142 g, 43%). [m.p. 123-125°C]. <sup>1</sup>H NMR (300 MHz, CDCl<sub>3</sub>)  $\delta$  8.45 (d, *J* = 8.1 Hz, 1H), 7.51 – 7.43 (m, 1H), 7.42 – 7.22 (m, 2H), 7.17 (s, 1H), 6.54 (s, 1H), 4.60 (s, 1H), 4.00 – 3.87 (m, 2H), 3.77 (s, 3H), 2.39 – 2.27 (m, 1H), 2.26 (s, 3H), 2.14 – 2.02 (m, 1H), 1.97 – 1.77 (m, 2H). <sup>13</sup>C NMR (75 MHz, CDCl<sub>3</sub>)  $\delta$  168.8, 165.6, 144.5, 136.0, 131.2, 125.3, 123.8, 121.1, 119.2, 118.7, 116.7, 106.4, 80.7, 65.6, 56.0, 52.6, 21.8, 21.5, 9.6. IR: 2942.4 (w), 2866.2 (w), 1756.5 (s), 1694.6 (s), 1651.7 (s), 1608.9 (w), 1451.7 (s), 1385.0 (s), 1349.3 (s), 1140.7 (s), 1065.9 (s), 1018.3 (m), 937.4 (m), 745.4 (s) cm<sup>-1</sup>. HRMS (ESI) M/Z+ Calc. 313.1314, Obs. 313.1312.

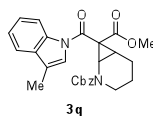

**2-benzyl 7-methyl 7-(3-methyl-1*H*-indole-1-carbonyl)-2-azabicyclo[4.1.0]heptane-2,7-dicarboxylate (3q).** The general procedure was followed using benzyl 3,4-dihydropyridine-1(2*H*)-carboxylate (0.179 g, 0.897 mmol), methyl 2-diazo-3-(3-methyl-1*H*-indol-1-yl)-3-oxopropanoate (0.300 g, 1.17 mmol), Rh<sub>2</sub>esp<sub>2</sub> (1.3 mg, 1.79  $\mu$ mol), and DCM (9 mL). After 12 h, the reaction was quenched, and column chromatography (20% EtOAc/Hex, R<sub>f</sub> 0.25) afforded **3q** as a colorless oil (0.295 g, 74%). <sup>1</sup>H NMR (300 MHz, CDCl<sub>3</sub>)  $\delta$  8.48 (d, *J* = 7.9 Hz, 1H), 7.49 (d, *J* = 7.5 Hz, 1H), 7.42 – 7.26 (m, 6H), 7.13 (t, *J* = 32.4 Hz, 2H), 5.20 (s, 2H), 4.77 (d, *J* = 26.5 Hz, 1H), 3.76 (d, *J* = 11.9 Hz, 3H), 3.71 – 3.44 (m, 2H), 2.27 (s, 3H), 2.51 – 2.02 (m, 2H), 1.96 – 1.74 (m, 2H). <sup>13</sup>C NMR (75 MHz, CDCl<sub>3</sub>)  $\delta$  168.5, 165.4, 153.4, 152.6, 135.9, 135.8, 131.2, 128.4, 128.1, 128.0, 126.2, 125.7, 125.4, 123.8, 121.1, 119.3, 118.7, 116.7, 111.5, 110.8, 67.6, 57.5, 52.7, 41.9, 41.7, 23.5, 22.8, 21.1, 14.5, 9.6. IR: 2942.4 (w), 2880.5 (w), 1751.6 (w), 1703.3 (s), 1691.6 (s), 1449.2 (m), 1406.5 (m), 1319.9 (m), 1260.5 (m), 1172.1 (m), 747.1 (m) cm<sup>-1</sup>. HRMS (ESI) M/Z+ Calc. 446.1842, Obs. 446.1840.

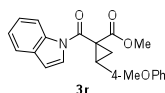

**Methyl 1-(1*H*-indole-4-yl)-2-(4-methoxyphenyl)cyclopropanecarboxylate (3r):** The general procedure was followed using 4-methoxystyrene (0.061 g, 0.459 mmol), methyl 2-diazo-3-(5-methyl-1*H*-indol-1-yl)-3-oxopropanoate (0.331 g, 2.466 mmol), Rh<sub>2</sub>esp<sub>2</sub> (1.87 mg, 2.4  $\mu$ mol), and DCM (20 mL). After 12 h, the reaction was quenched, and column chromatography (20% EtOAc/Hex, R<sub>f</sub> 0.30) afforded **3r** as a white solid (0.625 g, 72.8%). [m.p. 83-85°C] <sup>1</sup>H NMR (300 MHz, CDCl<sub>3</sub>)  $\delta$  8.44 (d, *J* = 8.2 Hz, 1H), 7.56 – 7.46 (m, 2H), 7.39 – 7.19 (m, 4H), 6.86 – 6.80 (m, 2H), 6.63 – 6.60 (m, 1H), 3.76 (s, 3H), 3.44 – 3.34 (m, 4H), 2.38 (dd, *J* = 8.3, 5.3 Hz, 1H), 1.82 (dd, *J* = 9.7, 5.6, 0.7 Hz, 1H). <sup>13</sup>C NMR (75 MHz, CDCl<sub>3</sub>)  $\delta$  167.8, 166.2, 158.9, 135.7, 130.4, 130.1, 125.8, 125.2, 124.7, 124.0, 120.9, 116.4, 113.5, 109.7, 55.1, 52.7, 39.3, 31.2, 18.8. IR: 3109.7 (w), 3010.1 (w), 2947.0 (w), 2827.4 (w), 1741.56 (m), 1715.0 (s), 1685.1 (s), 1615.4 (m), 1505.8 (m), 1450.0 (s), 1376.29 (m), 1333.4 (s), 1306.6 (s), 1246.1 (s), 1160.6 (s), 1149.4 (s), 1123.91 (m), 1074.1 (m), 1030.9 (m), 951.2 (m), 841.7 (m), 747.6 (s), 629.1 (m) cm<sup>-1</sup>. HRMS (ESI) M/Z+ Calc. 349.1314, Obs. 349.1310.

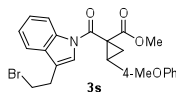

**Methyl 1-(3-(2-bromoethyl)-1H-indole-1-carbonyl)-2-(4-methoxyphenyl) cyclopropanecarboxylate (3s):** The general procedure was followed using 4-methoxy styrene (0.073 g, 0.549 mmol), methyl 3-(3-(2-bromoethyl)-1H-indol-1-yl)-2-diazo-3-oxopropanoate (0.250 g, 0.713 mmol), Rh<sub>2</sub>esp<sub>2</sub> (1.0 mg, 1.31 μmol), and DCM (15 mL). After 12 h, the reaction was quenched, and column chromatography (20% EtOAc/Hex, R<sub>f</sub> 0.35) afforded **3s** as a white solid (0.188 g, 75%). [m.p. 122-124°C]. <sup>1</sup>H NMR (300 MHz, CDCl<sub>3</sub>) δ 8.43 (d, *J* = 8.1 Hz, 1H), 7.51 – 7.45 (m, 1H), 7.41 – 7.19 (m, 5H), 6.86 – 6.79 (m, 2H), 3.76 (s, 3H), 3.61 (t, *J* = 7.0 Hz, 2H), 3.42 – 3.34 (m, 4H), 3.23 (t, *J* = 7.3, 4.4 Hz, 2H), 2.38 (dd, *J* = 8.3, 5.3 Hz, 1H), 1.82 (dd, *J* = 9.4, 5.2 Hz, 1H). <sup>13</sup>C NMR (75 MHz, CDCl<sub>3</sub>) δ 167.8, 166.0, 158.9, 136.0, 130.1, 130.0, 126.0, 125.6, 124.0, 122.4, 120.1, 119.3, 118.5, 116.7, 113.6, 55.2, 52.8, 43.4, 39.3, 31.4, 31.3, 28.7, 18.9. IR: 2982.4 (w), 2917.1 (w), 1722.1 (s), 1658.4 (s), 1441.3 (s), 1375.7 (s), 934.5 (s), 700.5 (s), 662.9 (m) cm<sup>-1</sup>. HRMS (ESI) M/Z+ Calc. 455.0708, Obs. 455.0732.

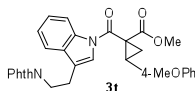

**Methyl 1-(3-(2-(1,3-dioxoisindolin-2-yl)ethyl)-1H-indole-1-carbonyl)-2-(4-methoxyphenyl)cyclopropanecarboxylate (3t):** The general procedure was followed using 4-methoxystyrene (0.208 g, 1.55 mmol), methyl 3-(3-(2-(1,3-dioxoisindolin-2-yl)ethyl)-1H-indol-1-yl)-3-oxopropanoate (0.810 g, 1.95 mmol), Rh<sub>2</sub>esp<sub>2</sub> (1.3 mg, 1.71 μmol), and DCM (8 mL). After 12 h, the reaction was quenched, and column chromatography (40% EtOAc/Hex, R<sub>f</sub> 0.38) afforded **3t** as a pale brown solid (0.182 g, 23%). [m.p. 158-160°C] <sup>1</sup>H NMR (300 MHz, CDCl<sub>3</sub>) δ 8.44 (d, *J* = 7.9 Hz, 1H), 7.88 – 7.81 (m, 2H), 7.78 – 7.65 (m, 3H), 7.44 – 7.24 (m, 5H), 6.92 – 6.83 (m, 2H), 4.02 (t, *J* = 7.2 Hz, 2H), 3.81 (s, 3H), 3.39 (t, *J* = 9.0, 1H), 3.38 (s, 3H), 3.11 (t, *J* = 7.7 Hz, 2H), 2.41 (dd, *J* = 8.3, 5.3 Hz, 1H), 1.79 (dd, *J* = 9.4, 5.3 Hz, 1H). <sup>13</sup>C NMR (75 MHz, CDCl<sub>3</sub>) (Rotamers!!) δ 168.2, 167.7, 166.0, 158.9, 136.1, 134.0, 133.8, 132.0, 130.4, 130.2, 126.0, 125.6, 124.0, 123.3, 123.2, 122.1, 122.0, 119.6, 119.5, 119.0, 118.9, 116.6, 113.6, 55.2, 53.4, 52.7, 39.6, 38.5, 37.4, 31.3, 24.3, 18.9. IR: 3051.9 (w), 2942.4 (w), 1760.0 (w), 1708.8 (s), 1685.1 (s), 1594.6 (m), 1513.6 (m), 1442.2 (m), 1375.5 (m), 1242.2 (m), 1104.0 (w), 832.6 (m), 732.8 (s), cm<sup>-1</sup>. HRMS (ESI) M/Z+ Calc. 522.1791, Obs. 522.1777.

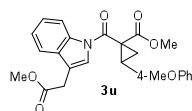

**Methyl 1-(3-(2-methoxy-2-oxoethyl)-1H-indole-1-carbonyl)-2-(4-methoxyphenyl) cyclopropanecarboxylate (3u):** The general procedure was followed using 4-methoxystyrene (0.211 g, 1.57 mmol), methyl 2-diazo-3-(3-(2-methoxy-2-oxoethyl)-1H-indol-1-yl)-3-oxopropanoate (0.611 g, 1.94 mmol), Rh<sub>2</sub>esp<sub>2</sub> (1.5 mg, 1.98 μmol), and DCM (8 mL). After 14 h, the reaction was quenched, and column chromatography (EtOAc/Hex, R<sub>f</sub> 0.21) afforded **3u** as a yellow solid (0.312 g, 47%). [m.p. 82 – 84 °C]. <sup>1</sup>H NMR (300 MHz, CDCl<sub>3</sub>) δ 8.46 (d, *J* = 8.1 Hz, 1H), 7.58 – 7.49 (m, 2H), 7.46 – 7.26 (m, 4H), 6.92 – 6.82 (m, 2H), 3.81 (s, 3H), 3.73 (s, 2H), 3.73 (s, 3H), 3.43 (s, 3H), 3.43 (t, *J* = 4.5 Hz, 1H), 2.42 (dd, *J* = 8.3, 5.3 Hz, 1H), 1.86 (dd, *J* = 9.4, 5.2 Hz, 1H). <sup>13</sup>C NMR (75 MHz, CDCl<sub>3</sub>) δ 171.0, 167.8, 166.0, 158.9, 135.9, 130.2, 130.1, 125.9, 125.6, 124.0, 123.3, 119.0, 116.6, 115.7, 113.6, 55.2, 52.8, 52.2, 39.3, 31.3, 30.8, 18.9. IR: 3009.0 (w), 2947.1 (w), 1742.2 (s), 1694.6 (s), 1608.9 (m), 1504.1 (m), 1446.9 (s), 1356.5 (s), 1246.9 (s), 1032.6 (m), 827.8 (m), 732.8 (s) cm<sup>-1</sup>. HRMS (ESI) M/Z+ Calc. 421.1525, Obs. 421.1519.

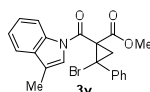

**Methyl 2-bromo-1-(3-methyl-1H-indole-1-carbonyl)-2-phenylcyclopropanecarboxylate(3v):** The general procedure was followed using (1-bromovinyl)benzene (0.150 g, 0.819 mmol), methyl 2-diazo-3-(3-methyl-1H-indol-1-yl)-3-oxopropanoate (0.274 g, 1.065 mmol), Rh<sub>2</sub>esp<sub>2</sub> (1.0 mg, 1.319 μmol), and DCM (12 mL). After 12 h, the reaction was quenched, and column chromatography (20% EtOAc/Hex, R<sub>f</sub> 0.40) afforded **3v** as a white solid (0.075 g, 22.2%). [m.p. 132-134°C] <sup>1</sup>H NMR (300 MHz, CDCl<sub>3</sub>) δ 8.12 – 8.04 (m, 1H), 7.48 – 7.37 (m, 3H), 7.27 – 7.18 (m, 3H), 7.17 – 7.04 (m, 3H), 3.80 (s, 3H), 2.86 (d, J = 7.3 Hz, 1H), 2.56 (d, J = 7.3 Hz, 1H), 2.27 (d, J = 1.3 Hz, 3H). <sup>13</sup>C NMR (75 MHz, CDCl<sub>3</sub>) δ 166.76, 161.38, 136.52, 135.61, 131.27, 128.86, 128.57, 127.85, 125.06, 123.77, 122.47, 118.71, 118.60, 116.25, 53.54, 43.79, 40.49, 26.14, 9.70. IR: 3066.5 (w), 2960.3 (w), 2920.4 (w), 2867.3 (w), 1737.9 (m), 1691.2 (m), 1678.5 (m), 1612.1 (w), 1448.6 (m), 1388.6 (m), 1346.9 (s), 1238.1 (s), 1218.1 (m), 1146.1 (m), 1120.2 (s), 1063.0 (m), 1018.9 (m), 914.7 (w), 749.3 (s), 693.5 (s), 632.5 (w) cm<sup>-1</sup>. HRMS (ESI) M/Z+ Calc. 411.0470, Obs. 411.0461.

#### D. In(OTf)<sub>3</sub>-Catalyzed Homo-Nazarov Cyclizations

**General Method A:** The cyclopropyl β-amide ester **3** (1.0 equiv) was added to a solution of In(OTf)<sub>3</sub> (0.30 equiv) in anhydrous dichloromethane (2 mL) at room temperature. Upon completion, the reaction mixture was quenched with water and the product was extracted from the aqueous phase with dichloromethane. The combined organic layers were washed with brine and dried over MgSO<sub>4</sub>. The organic layers were concentrated for silica gel flash column chromatography.

**General Method B:** To a mixture of In(OTf)<sub>3</sub> (0.30 equiv) in anhydrous 1,2-dichloroethane heated to a reflux, dissolved cyclopropyl β-amide ester **3** (1.0 equiv) was syringed into the reaction vessel. The reaction was monitored by TLC and quenched with water. The phases were separated, and the product was extracted from the aqueous phase with dichloromethane. The combined organic layers were washed with brine, dried over MgSO<sub>4</sub>, filtered, and concentrated for silica gel flash column chromatography.

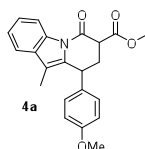

**Methyl 9-(4-methoxyphenyl)-10-methyl-6-oxo-6,7,8,9-tetrahydropyrido[1,2-a]indole-7-carboxylate(4a):** Methyl 2-(4-methoxyphenyl)-1-(3-methyl-1H-indole-1-carbonyl)cyclopropanecarboxylate (0.100 g, 0.275 mmol), In(OTf)<sub>3</sub> (0.046 g, 0.082 mmol) and DCM (4 mL) were combined according to general method A to afford **4a** as a pale brown oil (0.099 g, 99%) after 2 h. R<sub>f</sub> 0.35 (20% EtOAc/Hex). **Diastereomeric ratio:** (2.6:1). <sup>1</sup>H NMR (300 MHz, CDCl<sub>3</sub>) δ 8.55 – 8.47 (m, 1.34), 7.50 – 7.28 (m, 4.53), 7.15 – 7.09 (m, 0.86), 7.01 – 6.95 (m, 2.09), 6.88 – 6.80 (m, 3.05), 4.59 (t, J = 4.3 Hz, 0.94), 4.34 (dd, J = 8.5, 5.1 Hz, 0.36), 3.81 – 3.78 (m, 8.28), 3.69 (d, J = 4.5 Hz, 0.56), 3.65 (d, J = 4.5 Hz, 0.56), 3.56 (d, J = 1.1 Hz, 1.37), 2.92 – 2.68 (m, 1.40), 2.59 – 2.34 (m, 1.39), 2.00 (s, 3.0), 1.75 (s, 1.26). <sup>13</sup>C NMR (75 MHz, CDCl<sub>3</sub>) δ 169.6, 169.2, 165.0, 164.9, 158.5, 158.5, 134.5, 134.4, 133.7, 133.5, 132.8, 132.3, 131.3, 131.0, 128.9, 128.3, 124.8, 124.8, 124.1, 124.0, 118.1, 118.0, 116.5, 115.2, 114.8, 114.1, 113.9, 55.1, 52.5, 52.4, 49.7, 47.1, 43.4, 37.9, 35.2, 33.8, 33.0, 8.7, 8.3. IR: 3051.9 (w), 2932.8 (w), 1747.0 (s), 1685.1 (s), 1618.4 (w), 1451.7 (s), 1366.0 (s), 1242.2 (s), 1170.7 (s), 1156.4 (s), 1023.1 (s), 899.2 (m), 729.0 (s) cm<sup>-1</sup>. HRMS (ESI) M/Z+ Calc. 363.1471, Obs. 363.1475.

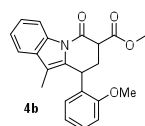

**Methyl 9-(2-methoxyphenyl)-10-methyl-6-oxo-6,7,8,9-tetrahydropyrido[1,2-a]indole-7-carboxylate (4b):** Methyl 2-(2-methoxyphenyl)-1-(3-methyl-1H-indole-1-carbonyl)cyclopropanecarboxylate (0.070 g,

0.192 mmol), In(OTf)<sub>3</sub> (0.032 g, 0.057 mmol) and DCM (3 mL) were mixed according to general method A to afford a pale yellow oil (0.066 g, 95.0%) after 3 h. R<sub>f</sub> 0.37 (20% EtOAc/Hex). *Diastereomeric ratio*: (3.2:1). <sup>1</sup>H NMR (300 MHz, CDCl<sub>3</sub>) δ 8.59 – 8.48 (m, 1.32), 7.50 – 7.29 (m, 4.33), 7.28 – 7.19 (m, 1.66), 6.93 (dd, *J* = 8.3, 3.2 Hz, 1.57), 6.84 – 6.74 (m, 1.84), 6.57 (dd, *J* = 7.5, 1.6 Hz, 1.12), 4.95 (dd, *J* = 4.9, 3.0 Hz, 1.03), 4.80 (t, *J* = 6.1 Hz, 0.32), 3.97 – 3.88 (m, 4.23), 3.83 – 3.75 (m, 3.52), 3.74 – 3.62 (m, 1.07), 3.45 (s, 0.94), 2.95 (dt, *J* = 13.8, 7.0 Hz, 0.37), 2.81 – 2.66 (m, 1.36), 2.61 – 2.44 (m, 1.44), 2.31 (q, *J* = 7.8 Hz, 0.37), 2.00 (s, 2.89), 1.81 (s, 0.94). <sup>13</sup>C NMR (75 MHz, CDCl<sub>3</sub>) δ 169.9, 169.4, 165.5, 156.8, 156.5, 134.6, 134.0, 131.2, 129.0, 128.6, 128.5, 128.4, 128.3, 124.7, 124.66, 124.15, 124.0, 122.1, 120.5, 120.4, 118.2, 117.9, 116.7, 116.6, 114.4, 110.5, 110.3, 55.4, 55.3, 52.5, 52.3, 49.5, 47.6, 31.0, 30.7, 30.1, 8.3, 8.3. IR: 3097.4 (w), 2986.9 (w), 2854.2 (w), 1724.1 (s), 1711.7 (m), 1657.3 (s), 1591.8 (m), 1440.0(s), 1374.7(s), 1221.0(s), 1044.7(s), 784.2 (s), 674.3 (m) cm<sup>-1</sup>. HRMS (ESI) M/Z+ Calc. 363.1471, Obs. 363.1472.

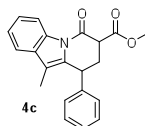

**Methyl 10-methyl-6-oxo-9-phenyl-6,7,8,9-tetrahydropyrido[1,2-a]indole-7-carboxylate (4c):** Methyl 1-(3-methyl-1*H*-indole-1-carbonyl)-2-phenylcyclopropane carboxylate (0.100 g, 0.300 mmol), In(OTf)<sub>3</sub> (0.050 g, 0.090 mmol) and DCE (4 mL) were combined according to general method B to afford **4c** as a brown oil (0.051 g, 52%) after 8 h. R<sub>f</sub> 0.25 (20% EtOAc/Hex). *Diastereomeric ratio*: (2.6:1). <sup>1</sup>H NMR (300 MHz, CDCl<sub>3</sub>) δ 8.57 – 8.47 (m, 1.37), 7.53 – 7.27 (m, 10.63), 7.07 (d, *J* = 7.4 Hz, 2.24), 4.64 (t, *J* = 4.3 Hz, 1.00), 4.40 (dd, *J* = 8.2, 5.7 Hz, 0.39), 3.80 (dd, *J* = 9.4, 3.3 Hz, 3.61), 3.75 – 3.63 (m, 1.46), 3.53 (d, *J* = 1.1 Hz, 1.28), 2.95 – 2.74 (m, 2.28), 2.64 – 2.42 (m, 2.12), 2.00 (s, 3.13), 1.74 (s, 1.24). <sup>13</sup>C NMR (75 MHz, CDCl<sub>3</sub>) δ 169.6, 169.2, 165.0, 164.9, 140.8, 140.5, 134.6, 133.3, 133.2, 131.3, 131.1, 128.9, 128.7, 128.6, 128.3, 128.0, 127.6, 127.3, 127.2, 127.2, 125.7, 125.0, 124.2, 124.1, 118.2, 118.0, 116.7, 116.6, 115.47, 115.12, 52.6, 52.4, 49.8, 47.1, 38.7, 36.1, 33.8, 32.9, 8.8, 8.4. IR: 3032.9 (w), 2961.4 (w), 2904.3 (w), 1744.6 (s), 1699.4 (s), 1537.4 (w), 1457.6 (s), 1382.5 (s), 1242.2 (m), 1018.3 (w), 749.9 (s) cm<sup>-1</sup>. HRMS (ESI) M/Z+ Calc. 333.1365, Obs. 333.1367.

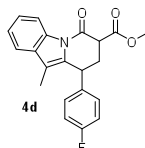

**Methyl 9-(4-fluorophenyl)-10-methyl-6-oxo-6,7,8,9-tetrahydropyrido[1,2-a]indole-7-carboxylate (4d):** Methyl 2-(4-fluorophenyl)-1-(3-methyl-1*H*-indole-1-carbonyl) cyclopropanecarboxylate (0.100 g, 0.285 mmol), In(OTf)<sub>3</sub> (0.047 g, 0.085 mmol, 30 mol%) and DCE (4 mL) were combined according to general method B to afford **4d** as a brown oil (0.048 g, 48%) after 8 h. R<sub>f</sub> 0.28 (20% EtOAc/Hex). *Diastereomeric ratio*: (2.6:1). <sup>1</sup>H NMR (300 MHz, CDCl<sub>3</sub>) δ 8.57 – 8.46 (m, 1.37), 7.76 (d, *J* = 8.1 Hz, 0.68), 7.53 – 7.29 (m, 5.16), 7.26 – 6.77 (m, 12.82), 5.75 (s, 0.62), 4.62 (t, *J* = 4.4 Hz, 1.00), 4.39 (dd, *J* = 8.2, 5.3 Hz, 0.35), 3.80 (s, 3.03), 3.65 (dd, *J* = 11.8, 4.5 Hz, 1.24), 3.55 (s, 1.24), 2.93 – 2.79 (m, 2.17), 2.61 – 2.38 (m, 1.87), 2.00 (s, 3.18), 1.76 (s, 1.43). <sup>13</sup>C NMR (75 MHz, CDCl<sub>3</sub>) δ 169.5, 169.2, 164.8, 160.2, 136.2, 134.6, 132.9, 131.0, 129.6, 129.4, 128.9, 128.8, 125.1, 124.3, 124.2, 118.3, 118.1, 116.6, 115.9, 115.6, 115.4, 115.2, 52.7, 52.5, 49.6, 47.8, 47.1, 35.9, 35.4, 33.8, 33.0, 33.1, 8.4. IR: 3051.9 (w), 2932.8 (w), 2861.4 (w), 1738.3 (m), 1664.6 (m), 1604.1 (m), 1535.1 (m), 1508.3 (m), 1314.8 (m), 1250.8 (s), 1209.5 (s), 1097.4 (m), 989.0 (w), 832.4 (m), 736.0 (s) cm<sup>-1</sup>. HRMS (ESI) M/Z+ Calc. 351.1271, Obs. 351.1272.

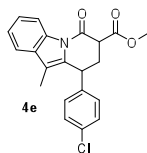

**Methyl 9-(4-chlorophenyl)-10-methyl-6-oxo-6,7,8,9-tetrahydropyrido[1,2-a]indole-7-carboxylate (4e):** Methyl 2-(4-chlorophenyl)-1-(3-methyl-1H-indole-1-carbonyl) cyclopropanecarboxylate (0.100 g, 0.272 mmol), In(OTf)<sub>3</sub> (0.045 g, 0.081 mmol) and DCE (4 mL) were mixed according to general method B to yield a brown oil (0.049 g, 49.7%) after 12 h. *R<sub>f</sub>* 0.43 (15% EtOAc/Hex). *Diastereomeric ratio:* (1.9:1). <sup>1</sup>H NMR (300 MHz, CDCl<sub>3</sub>) δ 8.55 – 8.46 (m, 1.38), 7.50 – 7.27 (m, 8.02), 7.17 – 7.13 (m, 1.05), 7.04 – 6.98 (m, 2.15), 6.81 – 6.77 (m, 0.45), 4.61 (t, *J* = 4.6 Hz, 1.00), 4.40 (dd, *J* = 7.6, 5.8 Hz, 0.52), 3.80 (s, 3.14), 3.65 (d, *J* = 4.5 Hz, 0.55), 3.61 (d, *J* = 4.5 Hz, 0.55), 3.54 (s, 1.24), 2.93 – 2.70 (m, 2.53), 2.62 – 2.37 (m, 2.54), 1.99 (s, 2.80), 1.77 (s, 1.20). <sup>13</sup>C NMR (75 MHz, CDCl<sub>3</sub>) δ 169.4, 164.7, 139.1, 134.6, 133.2, 132.6, 131.0, 129.3, 129.1, 129.0, 128.8, 128.7, 127.1, 125.2, 124.4, 124.3, 118.3, 118.2, 116.7, 115.3, 77.4, 77.2, 77.0, 76.5, 52.7, 52.5, 49.6, 47.1, 38.0, 35.6, 33.6, 32.9, 8.9, 8.5. IR: 3051.9 (w), 2956.6 (m), 2918.6 (m), 2847.1 (m), 1747.0 (m), 1699.4 (m), 1613.6 (m), 1542.2 (s), 1313.6 (m), 1251.5 (m), 1208.8 (m), 1094.5 (w), 1004.0 (w), 832.6 (w), 737.7 (s) cm<sup>-1</sup>. HRMS (ESI) *M/Z*+ Calc. 367.0975, Obs. 367.0988.

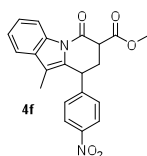

**Methyl 10-methyl-9-(4-nitrophenyl)-6-oxo-6,7,8,9-tetrahydropyrido[1,2-a]indole-7-carboxylate (4f):** Methyl 1-(3-methyl-1H-indole-1-carbonyl)-2-(4-nitrophenyl) cyclopropanecarboxylate (0.100 g, 0.264 mmol), In(OTf)<sub>3</sub> (0.044 g, 0.079 mmol) and DCE (4 mL) were mixed according to general method B to yield a brown oil after 20 h. The reaction afforded an inseparable mixture of trace amounts of **4f** and other by-products as observed by crude <sup>1</sup>H NMR. *R<sub>f</sub>* 0.35 (15% EtOAc/Hex).

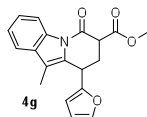

**Methyl 9-(furan-2-yl)-10-methyl-6-oxo-6,7,8,9-tetrahydropyrido[1,2-a]indole-7-carboxylate (4g):** Methyl 2-(furan-2-yl)-1-(3-methyl-1H-indole-1-carbonyl)cyclopropane carboxylate (0.050 g, 0.154 mmol), In(OTf)<sub>3</sub> (0.026 g, 0.046 mmol) and DCM (3 mL) were mixed according to general method A to afford a colorless oil (0.049 g, 99.0%) after 2 h. *R<sub>f</sub>* 0.40 (20% EtOAc/Hex). *Diastereomeric ratio:* (4.5:1). <sup>1</sup>H NMR (300 MHz, CDCl<sub>3</sub>) δ 8.57 – 8.51 (m, 0.37), 8.50 – 8.42 (m, 0.97), 7.53 – 7.46 (m, 1.50), 7.42 – 7.29 (m, 3.77), 6.30 – 6.25 (m, 1.21), 5.91 – 5.87 (m, 1.16), 4.65 (t, *J* = 3.9 Hz, 1), 4.52 (t, *J* = 5.2 Hz, 0.22), 3.84 (d, *J* = 1.0 Hz, 3.24), 3.81 – 3.72 (m, 1.42), 3.51 (d, *J* = 0.8 Hz, 0.69), 3.08 (dt, *J* = 13.8, 5.6 Hz, 0.25), 2.72 (dt, *J* = 4.4, 3.6 Hz, 2.07), 2.53 (dt, *J* = 13.8, 5.3 Hz, 0.27), 2.15 (d, *J* = 0.3 Hz, 3.09), 2.00 (d, *J* = 0.9 Hz, 0.67). <sup>13</sup>C NMR (75 MHz, CDCl<sub>3</sub>) δ 169.6, 164.8, 152.4, 142.4, 142.1, 134.6, 131.1, 130.8, 125.1, 124.2, 118.3, 116.6, 115.3, 110.3, 110.2, 108.1, 107.6, 52.7, 47.7, 31.3, 30.7, 29.3, 8.3. IR: 3090.2 (w), 2936.8 (w), 1767.1 (s), 1725.6 (s), 1469.4(s), 1376.2(m), 1269.5(m), 785.4 (s), 663.0 (m) cm<sup>-1</sup>. HRMS (ESI) *M/Z*+ Calc. 323.1158, Obs. 323.1159.

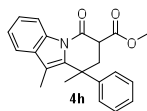

**Methyl 9,10-dimethyl-6-oxo-9-phenyl-6,7,8,9-tetrahydropyrido[1,2-a]indole-7-carboxylate (4h):** Methyl 2-methyl-1-(3-methyl-1H-indole-1-carbonyl)-2-phenyl cyclopropanecarboxylate (0.070 g, 0.201 mmol), In(OTf)<sub>3</sub> (0.033 g, 0.060 mmol) and DCM (3 mL) were combined according to general Method A to afford a **4h** as a white solid (0.065 g, 94.14%) after 2 h. *R<sub>f</sub>* 0.28 (20% EtOAc/Hex). [m.p. 139-141°C] *Diastereomeric ratio:* (1.1:1). <sup>1</sup>H NMR (300 MHz, CDCl<sub>3</sub>) δ 8.58 – 8.50 (m, 1.81), 7.54 (ddt, *J* = 7.6, 4.3, 2.2 Hz, 1.0), 7.45 – 7.25 (m, 13.52), 7.13 – 7.08 (m, 2.11), 3.99 (dd, *J* = 12.2, 5.0 Hz, 0.80), 3.80 (s, 3.0), 3.72 (s, 2.71), 3.43 (dd, *J* = 13.2, 4.4 Hz, 0.99), 2.84 (dt, *J* = 26.7, 13.4 Hz, 1.88), 2.50 – 2.41 (m, 1.35), 2.26 – 2.18 (m, 4.15), 1.99 (s, 2.99), 1.85 (s, 2.62), 1.65 (s, 2.68). <sup>13</sup>C NMR (75 MHz, CDCl<sub>3</sub>) δ 169.5, 169.4, 165.3, 164.9, 145.9, 143.8, 138.5, 136.9, 134.3, 134.2, 131.6, 131.9, 128.9, 128.5, 127.1, 126.8, 126.4, 125.9, 125.1, 124.9, 124.1, 124.1, 118.0, 117.9, 116.7, 115.6, 114.6, 52.6, 48.5, 47.9, 42.1, 41.23, 40.74, 39.56, 29.4, 24.6, 10.0, 9.2. IR: 3040.9 (w), 2963.4 (w), 2890.4 (w), 1722.2 (s), 1640.6 (s), 1483.9 (s), 1383.5 (s), 1270.4 (m), 1182.4 (m), 1134.3 (w), 740.1 (s), 640.4 (s) cm<sup>-1</sup>. HRMS (ESI) *M/Z*+ Calc. 347.1521, Obs. 347.1516.

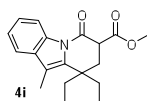

**Methyl 9,9-diethyl-10-methyl-6-oxo-6,7,8,9-tetrahydropyrido[1,2-a]indole-7-carboxylate (4i):** Methyl 2,2-diethyl-1-(3-methyl-1H-indole-1-carbonyl)cyclopropane carboxylate (0.055 g, 0.175 mmol), In(OTf)<sub>3</sub> (0.029 g, 0.052 mmol) and DCE (3 mL) were mixed according to general method B to yield a colorless oil (0.046 g, 84.8%) after 6 h. *R<sub>f</sub>* 0.38 (20% EtOAc/Hex). <sup>1</sup>H NMR (300 MHz, CDCl<sub>3</sub>) δ 8.51 – 8.44 (m, 1H), 7.44 (ddd, *J* = 6.7, 4.5, 2.6 Hz, 1H), 7.34 – 7.28 (m, 2H), 3.94 – 3.83 (m, 4H), 2.58 (t, *J* = 13.5 Hz, 1H), 2.30 (d, *J* = 0.7 Hz, 3H), 2.21 (dt, *J* = 14.6, 7.4 Hz, 1H), 1.95 (dd, *J* = 13.7, 5.0 Hz, 1H), 1.87 – 1.65 (m, 3H), 0.93 (dt, *J* = 10.0, 7.4 Hz, 6H). <sup>13</sup>C NMR (75 MHz, CDCl<sub>3</sub>) δ 170.2, 165.3, 136.9, 134.4, 131.7, 124.7, 123.9, 117.6, 116.6, 113.7, 77.4, 76.9, 76.5, 52.7, 47.4, 39.3, 32.3, 31.6, 29.1, 9.7, 8.5, 8.3. IR: 3025.9 (w), 2894.8 (w), 1786.6 (s), 1725.4 (s), 1484.2 (s), 1383.2 (m), 1283.0 (m), 1180.6 (m), 713.41 (s), 662.9 (m) cm<sup>-1</sup>. HRMS (ESI) *M/Z*+ Calc. 313.1678, Obs. 313.1678.

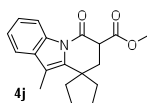

**Methyl 10'-methyl-6'-oxo-7',8'-dihydro-6'H-spiro[cyclopentane-1,9'-pyrido[1,2-a]indole]-7'-carboxylate (4j):** Methyl 1-(3-methyl-1H-indole-1-carbonyl)spiro[2.4] heptane-1-carboxylate (0.050 g, 0.160 mmol), In(OTf)<sub>3</sub> (0.027 g, 0.048 mmol) and DCE (3 mL) were mixed according to general method B to yield a colorless oil (0.044 g, 88.8%) after 6 h. *R<sub>f</sub>* 0.35 (20% EtOAc/Hex). <sup>1</sup>H NMR (300 MHz, CDCl<sub>3</sub>) δ 8.48 – 8.41 (m, 1H), 7.47 – 7.41 (m, 1H), 7.30 (ddd, *J* = 4.6, 4.2, 2.9 Hz, 2H), 3.85 (d, *J* = 0.8 Hz, 3H), 3.84 – 3.79 (m, 1H), 2.69 – 2.54 (m, 1H), 2.47 (t, *J* = 13.2 Hz, 1H), 2.30 (d, *J* = 0.7 Hz, 3H), 2.13 (dd, *J* = 13.4, 4.6 Hz, 1H), 2.02 – 1.83 (m, 5H), 1.83 – 1.70 (m, 2H). <sup>13</sup>C NMR (75 MHz, CDCl<sub>3</sub>) δ 169.9, 165.4, 139.3, 134.0, 131.9, 124.7, 124.0, 117.6, 116.5, 112.6, 52.7, 48.8, 42.6, 39.0, 38.7, 37.8, 25.8, 25.3, 9.73. IR: 2998.5 (w), 2893.7 (w), 1786.8 (s), 1724.9 (s), 1470.0 (s), 1385.1 (m), 1269.5 (m), 1180.4 (m), 714.3 (s), 662.7 (m) cm<sup>-1</sup>. HRMS (ESI) *M/Z*+ Calc. 311.1521, Obs. 311.1520.



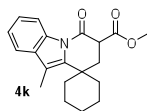

**Methyl 10'-methyl-6'-oxo-7',8'-dihydro-6'-H-spiro[cyclohexane-1,9'-pyrido[1,2-a]indole]-7'-carboxylate (4k):** Methyl 1-(3-methyl-1H-indole-1-carbonyl)spiro[2.5]octane-1-carboxylate (0.080 g, 0.246 mmol), In(OTf)<sub>3</sub> (0.041 g, 0.073 mmol) and DCE (3 mL) were mixed according to general method B to yield a colorless oil (0.062 g, 78.6%) after 6 h. *R<sub>f</sub>* 0.39 (20% EtOAc/Hex). (*Conformers!!*) <sup>1</sup>H NMR (300 MHz, CDCl<sub>3</sub>) δ 8.49 – 8.41 (m, 1H), 7.47 – 7.42 (m, 1H), 7.36 – 7.27 (m, 2H), 3.86 (dd, *J* = 2.9, 0.6 Hz, 3H), 3.76 (dd, *J* = 13.1, 4.6 Hz, 1H), 2.71 – 2.59 (m, 3H), 2.54 – 2.39 (m, 4H), 2.36 – 2.17 (m, 2H), 1.91 – 1.76 (m, 4H), 1.70 (d, *J* = 11.9 Hz, 3H). <sup>13</sup>C NMR (75 MHz, CDCl<sub>3</sub>) δ 170.2, 165.5, 139.5, 134.0, 132.1, 125.1, 124.8, 123.9, 121.7, 119.4, 117.7, 116.6, 114.4, 113.1, 58.6, 52.7, 47.2, 36.1, 35.6, 33.9, 33.7, 32.7, 31.2, 30.8, 25.6, 25.4, 23.1, 21.5, 21.3, 10.8, 10.2. IR: 2969.7 (w), 2890.9 (w), 1736.7 (m), 1689.1 (m), 1469.0 (m), 1382.7 (m), 1269.5 (s), 759.9 (s), 662.9 (s) cm<sup>-1</sup>. HRMS (ESI) *M/Z*+ Calc. 325.1678, Obs. 325.1681.

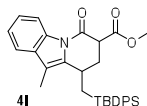

**Methyl 9-((tert-butyl)diphenylsilyl)methyl-10-methyl-6-oxo-6,7,8,9-tetrahydropyrido[1,2-a]indole-7-carboxylate (4l):** Methyl 2-((tert-butyl)diphenylsilyl)methyl-1-(3-methyl-1H-indole-1-carbonyl)cyclopropanecarboxylate (0.100 g, 0.196 mmol), In(OTf)<sub>3</sub> (0.033 g, 0.058 mmol) and DCE (4 mL) were combined according to general method B to afford a colorless oil (0.082 g, 82%) after 16 h. *R<sub>f</sub>* 0.41 (20% EtOAc/Hex). <sup>1</sup>H NMR (300 MHz, CDCl<sub>3</sub>) δ 8.37 (ddd, *J* = 4.3, 2.2, 0.6 Hz, 1H), 7.72 – 7.66 (m, 4H), 7.45 – 7.32 (m, 7H), 7.29 – 7.24 (m, 2H), 3.89 (dd, *J* = 13.5, 4.8 Hz, 1H), 3.72 (s, 3H), 3.45 – 3.33 (m, 1H), 2.19 (ddd, *J* = 18.1, 8.8, 3.1 Hz, 1H), 1.99 (s, 3H), 1.83 (ddd, *J* = 13.5, 4.8, 2.5 Hz, 1H), 1.55 (dd, *J* = 8.3, 4.6 Hz, 2H), 1.06 – 1.00 (m, 9H). <sup>13</sup>C NMR (75 MHz, CDCl<sub>3</sub>) δ 169.7, 165.1, 138.5, 135.8, 135.7, 134.4, 134.1, 133.0, 131.2, 129.5, 129.4, 127.9, 124.5, 124.0, 117.9, 116.5, 112.0, 52.4, 46.7, 29.9, 27.7, 26.5, 18.3, 14.9, 8.5. IR: 3061.4 (w), 2951.9 (m), 2928.1 (m), 2851.9 (m), 1745.6 (s), 1692.0 (s), 1457.2 (s), 1381.4 (s), 1270.6 (m), 1103.8 (m), 740.4 (s), 702.1 (s) cm<sup>-1</sup>. HRMS (ESI) *M/Z*+ Calc. 509.2386, Obs. 509.2383.

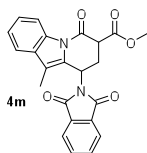

**Methyl 9-(1,3-dioxoisindolin-2-yl)-10-methyl-6-oxo-6,7,8,9-tetrahydropyrido[1,2-a]indole-7-carboxylate (4m):** Methyl 2-(1,3-dioxoisindolin-2-yl)-1-(3-methyl-1H-indole-1-carbonyl)cyclopropanecarboxylate (0.090 g, 0.224 mmol), In(OTf)<sub>3</sub> (0.037 g, 0.067 mmol) and DCE (4 mL) were mixed according to general method B to yield a yellow-green solid (0.049 g, 55%) after 8 h. *R<sub>f</sub>* 0.38 (20% EtOAc/Hex). [m.p. 167–169°C] *Diastereomeric ratio*: (4.8:1). <sup>1</sup>H NMR (300 MHz, CDCl<sub>3</sub>) δ 8.52 – 8.47 (m, 1.27), 7.89 – 7.70 (m, 5.64), 7.46 – 7.28 (m, 4.18), 5.96 (t, *J* = 4.5 Hz, 1.00), 4.19 (dt, *J* = 12.5, 6.3 Hz, 0.70), 3.83 – 3.79 (m, 3.92), 2.86 (ddd, *J* = 14.1, 11.8, 5.3 Hz, 0.75), 2.58 (ddd, *J* = 14.3, 4.9, 4.0 Hz, 0.75), 2.29 – 2.26 (m, 0.22), 2.07 (s, 2.75), 2.04 (s, 0.38). <sup>13</sup>C NMR (75 MHz, CDCl<sub>3</sub>) δ 169.5, 167.6, 164.4, 134.8, 134.5, 131.3, 130.3, 128.2, 125.8, 124.1, 123.6, 118.5, 116.7, 116.3, 52.8, 48.2, 40.3, 30.7, 8.3. IR: 3061.6 (w), 2942.6 (w), 2928.32 (w), 1733.2 (m), 1708.2 (s), 1614.2 (w), 1452.3 (m), 1452.3 (m), 1383.6 (s), 1309.5 (s), 1261.0 (s), 1104.7 (m), 890.4 (m), 734.4 (s) cm<sup>-1</sup>. HRMS (ESI) *M/Z*+ Calc. 402.1216, Obs. 402.1219.

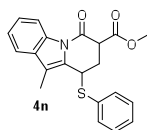

**Methyl 10-methyl-6-oxo-9-(phenylthio)-6,7,8,9-tetrahydropyrido[1,2-a]indole-7-carboxylate (4n):** Methyl 1-(3-methyl-1H-indole-1-carbonyl)-2-(phenylthio)cyclopropane carboxylate (0.018 g, 0.049 mmol), In(OTf)<sub>3</sub> (0.008 g, 0.014 mmol) and DCE (1 mL) were mixed according to general method B to yield a colorless oil (0.014 g, 81%) after 7 h. *R<sub>f</sub>* 0.30 (20% EtOAc/Hex). *Diastereomeric ratio:* (10:1). **<sup>1</sup>H NMR** (300 MHz, CDCl<sub>3</sub>) δ 8.54 (d, *J* = 8.6 Hz, 0.10), 8.47 – 8.40 (m, 1), 7.54 – 7.29 (m, 9.0), 4.91 – 4.84 (m, 1.06), 4.48 (dd, *J* = 13.1, 4.8 Hz, 1.04), 3.94 – 3.76 (m, 3.80), 2.72 (td, *J* = 13.6, 3.9 Hz, 1.19), 2.42 – 2.32 (m, 1.42), 2.20 (s, 0.31), 2.04 (s, 3.10). **<sup>13</sup>C NMR** (75 MHz, CDCl<sub>3</sub>) δ 169.6, 164.5, 134.7, 134.5, 132.5, 130.5, 130.4, 129.3, 129.2, 128.8, 128.6, 125.6, 124.3, 118.5, 116.6, 52.8, 46.9, 40.0, 29.6, 8.3. **IR:** 2997.7 (w), 2890.9 (w), 1766.6 (m), 1711.7 (m), 1468.2 (m), 1269.7 (s), 760.1 (s), 663.0 (s) cm<sup>-1</sup>. **HRMS (ESI) M/Z+ Calc.** 365.1119, Obs. 365.1089.

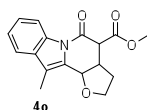

**Methyl 11-methyl-5-oxo-2,3,3a,4,5,11b-hexahydrofuro[2',3':3,4]pyrido[1,2-a]indole-4-carboxylate (4o):** Methyl 6-(3-methyl-1H-indole-1-carbonyl)-2-oxabicyclo[3.1.0] hexane-6-carboxylate (0.025 g, 0.083 mmol), In(OTf)<sub>3</sub> (0.014 g, 0.025 mmol) and DCM (2 mL) were combined according to general method A to afford a colorless oil (0.024 g, 97%) after 2.5 h. *R<sub>f</sub>* 0.30 (20% EtOAc/Hex). **<sup>1</sup>H NMR** (300 MHz, CDCl<sub>3</sub>) δ 8.39 (d, *J* = 4.9, 3.3 Hz, 1H), 7.51 (d, *J* = 6.8, 1.3 Hz, 1H), 7.41 – 7.27 (m, 2H), 5.05 (d, *J* = 4.5 Hz, 1H), 4.17 – 3.99 (m, 2H), 3.87 (s, 3H), 3.78 (d, *J* = 10.7 Hz, 1H), 3.32 – 3.21 (m, 1H), 2.47 – 2.22 (m, 1H), 2.32 (s, 3H), 1.96 – 1.82 (m, 1H). **<sup>13</sup>C NMR** (75 MHz, CDCl<sub>3</sub>) δ 169.2, 164.0, 134.5, 130.9, 128.8, 125.8, 124.2, 119.5, 118.8, 116.4, 69.9, 66.3, 52.8, 52.3, 40.7, 30.7, 8.5. **IR:** 2947.1 (w), 2923.3 (w), 2856.6 (w), 1744.8 (s), 1703.1 (s), 1623.2 (w), 1459.5 (m), 1382.2 (s), 1265.2 (m), 1035.5 (m), 751.0 (s) cm<sup>-1</sup>. **HRMS (ESI) M/Z+ Calc.** 299.1158, Obs. 299.1158.

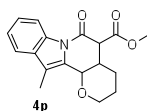

**Methyl 12-methyl-6-oxo-3,4,4a,5,6,12b-hexahydro-2H-pyrano[2',3':3,4]pyrido[1,2-a]indole-5-carboxylate (4p):** Methyl 7-(3-methyl-1H-indole-1-carbonyl)-2-oxabicyclo[4.1.0]heptane-7-carboxylate (0.025 g, 0.079 mmol), In(OTf)<sub>3</sub> (0.013 g, 0.023 mmol) and DCM (2 mL) were mixed according to general method A to yield a pale yellow solid (0.023 g, 92.9%) after 2.5 h. *R<sub>f</sub>* 0.25 (20% EtOAc/Hex). [*m.p.* 128–130°C] **<sup>1</sup>H NMR** (300 MHz, CDCl<sub>3</sub>) δ 8.41 (d, 1H), 7.50 (d, 1H), 7.40 – 7.25 (m, 2H), 4.81 (s, 1H), 4.33 (d, *J* = 12.2 Hz, 1H), 4.08 (d, 1H), 3.86 (s, 3H), 3.71 (t, *J* = 11.6, 2.4 Hz, 2H), 2.72 (d, 1H), 2.30 (s, 3H), 1.98 – 1.73 (m, 2H), 1.56 – 1.47 (m, 1H). **<sup>13</sup>C NMR** (75 MHz, CDCl<sub>3</sub>) δ 169.5, 165.2, 134.3, 130.8, 125.8, 124.2, 122.2, 118.8, 117.7, 116.6, 68.3, 68.1, 52.6, 50.1, 35.7, 25.7, 20.4, 8.4. **IR:** 2737.5(w), 1746.9(m), 1632.6(w), 1532.6(m), 1056.8(w), 751.6(s), 680.1(s) cm<sup>-1</sup>. **HRMS (ESI) M/Z+ Calc.** 313.1314, Obs. 313.1315.

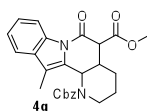

**1-Benzyl 5-methyl 12-methyl-6-oxo-2,3,4,4a,5,6-hexahydroindolo[1,2-*h*][1,7] naphthyridine-1,5(12*bH*)-dicarboxylate (4q):** 2-benzyl 7-methyl 7-(3-methyl-1*H*-indole-1-carbonyl)-2-azabicyclo[4.1.0]heptane-2,7-dicarboxylate (0.100 g, 0.223 mmol), In(OTf)<sub>3</sub> (0.037 g, 0.067 mmol) and DCM (4 mL) were combined according to general method A to afford **4q** as a colorless oil (0.098 g, 98.0%) after 2 h. *R<sub>f</sub>* 0.25 (25% EtOAc/Hex). *Diastereomeric ratio:* (7.1:1). <sup>1</sup>H NMR (300 MHz, CDCl<sub>3</sub>) δ 8.55 – 8.40 (m, 1.22), 7.52 – 7.27 (m, 10.67), 5.98 (d, 1), 5.91 (d, 0.14), 5.38 – 5.16 (m, 2.64), 4.20 – 4.04 (m, 1.20), 3.95 (dd, *J* = 13.9, 3.7 Hz, 0.23), 3.85 (s, 0.77), 3.74 (s, 3), 3.68 (d, *J* = 1.7 Hz 1.41), 2.81 – 2.50 (m, 2.68), 2.35 – 2.20 (m, 0.32), 2.08 – 2.03 (m, 3.99), 1.79 – 1.85 (m, 1.54), 1.58 – 1.70 (m, 2.70), 1.51 – 1.33 (m, 1.42). <sup>13</sup>C NMR (75 MHz, CDCl<sub>3</sub>) δ 168.4, 167.6, 162.6, 155.0, 136.3, 134.5, 131.3, 128.4, 128.3, 128.1, 127.8, 127.7, 125.1, 124.1, 122.0, 117.9, 116.4, 116.3, 67.5, 56.0, 53.5, 53.0, 52.4, 48.3, 39.4, 37.9, 34.5, 31.4, 26.5, 25.1, 24.6, 22.5, 14.6, 7.6. IR: 3042.4 (w), 2932.8 (w), 2861.4 (w), 1738.4 (s), 1702.9 (s), 1457.3 (m), 1373.1 (s), 1256.6 (m), 1201.5 (m), 1164.4 (m), 1113.6 (w), 761.1 (m), 689.7 (m) cm<sup>-1</sup>. HRMS (ESI) *M/Z*+ Calc. 446.1842, Obs. 446.1840.

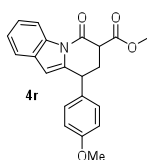

**Methyl 9-(4-methoxyphenyl)-6-oxo-6,7,8,9-tetrahydropyrido[1,2-*a*]indole-7-carboxylate (4r):** Methyl 1-(1*H*-indole-1-carbonyl)-2-(4-methoxyphenyl)cyclopropanecarboxylate (0.75 g, 0.215 mmol), In(OTf)<sub>3</sub> (0.036 g, 0.064 mmol) and DCM (4 mL) were combined according to general method A to afford **4r** as a colorless oil (0.742 g, 98.99%) after 45 min. *R<sub>f</sub>* 0.30 (20% EtOAc/Hex). *Diastereomeric ratio:* (1.1:1). <sup>1</sup>H NMR (300 MHz, CDCl<sub>3</sub>) δ 8.53 – 8.42 (m, 1.77), 7.45 – 7.20 (m, 8.18), 7.19–7.12 (m, 1.68), 6.96 – 6.85 (m, 3.86), 6.08 (s, 0.78), 6.00 – 5.89 (m, 1), 4.36 (dd, *J* = 9.9, 4.2 Hz, 0.76H), 4.13 (dd, *J* = 13.0, 2.6 Hz, 1.09), 3.97 – 3.79 (m, 13.94), 2.79 – 2.64 (m, 1.92), 2.54 – 2.37 (m, 1.88). <sup>13</sup>C NMR (75 MHz, CDCl<sub>3</sub>) δ 169.5, 169.3, 165.3, 164.7, 159.1, 158.9, 141.5, 140.6, 135.2, 135.1, 132.7, 132.3, 129.6, 129.5, 129.3, 129.0, 124.7, 124.4, 124.4, 120.1, 120.1, 116.6, 116.5, 114.2, 107.6, 55.3, 53.0, 52.8, 51.6, 49.2, 40.3, 37.4, 33.6, 33.2. IR: 2997.1 (w), 2950.6 (w), 2834.32 (w), 1737.9 (s), 1703.3 (s), 1555.7 (w), 1512.5 (m), 1453.1 (s), 1379.0 (s), 13050.2 (s), 1247.2 (s), 1177.1 (s), 1034.6 (s), 838.4 (m), 798.5 (m), 752.0 (m), 688.9 (w) cm<sup>-1</sup>. HRMS (ESI) *M/Z*+ Calc. 349.1314, Obs. 349.1307.

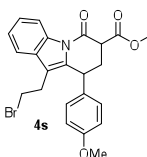

**Methyl 10-(2-bromoethyl)-9-(4-methoxyphenyl)-6-oxo-6,7,8,9-tetrahydropyrido[1,2-*a*]indole-7-carboxylate (4s):** Methyl 1-(3-(2-bromoethyl)-1*H*-indole-1-carbonyl)-2-(4-methoxyphenyl)cyclopropane carboxylate (0.050 g, 0.109 mmol), In(OTf)<sub>3</sub> (0.018 g, 0.032 mmol) and DCM (3 mL) were mixed according to general method A to afford **4s** as a colorless oil (0.049 g, 98.2%) after 1 h. *R<sub>f</sub>* 0.35 (20% EtOAc/Hex). *Diastereomeric ratio:* (2.7:1). <sup>1</sup>H NMR (300 MHz, CDCl<sub>3</sub>) δ 8.54 (ddd, *J* = 10.3, 6.9, 1.4 Hz, 1.38), 7.53 – 7.29 (m, 4.31), 7.16 – 7.11 (m, 0.81), 6.95 (dd, *J* = 6.9, 4.7 Hz, 2.07), 6.89 – 6.80 (m, 2.88), 4.68 (t, *J* = 4.2 Hz, 1), 4.43 (dd, *J* = 8.8, 5.3 Hz, 0.37), 3.86 – 3.77 (m, 7.57), 3.69 (dd, *J* = 12.2, 4.6 Hz, 1.29), 3.57 (d, *J* = 3.5 Hz, 1.28), 3.53 – 3.05 (m, 4.08), 3.03 – 2.73 (m, 3.37), 2.66 – 2.37 (m, 2.03). <sup>13</sup>C NMR (75 MHz, CDCl<sub>3</sub>) δ 169.4, 165.2, 158.8, 135.5, 134.7, 132.3, 129.6, 129.1, 128.3, 125.2, 124.4, 118.0, 116.9, 116.0, 114.3, 114.2, 55.3, 52.7, 47.1, 35.4, 33.0, 30.9, 27.7. IR: 3023.9 (w), 2918.9 (w), 1725.1 (s), 1658.6 (s), 1591.0 (m), 1493.2 (s), 1349.0 (m), 993.6(s), 725.0 s), 663.0 (m) cm<sup>-1</sup>. HRMS (ESI) *M/Z*+ Calc. 455.0708, Obs. 455.0734.

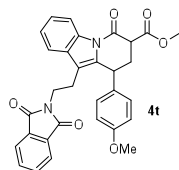

**Methyl 10-(2-(1,3-dioxoisindolin-2-yl)ethyl)-9-(4-methoxyphenyl)-6-oxo-6,7,8,9-tetrahydropyrido[1,2-a]indole-7-carboxylate (4t):** Methyl 1-(3-(2-(1,3-dioxoisindolin-2-yl)ethyl)-1H-indole-1-carbonyl)-2-(4-methoxyphenyl)cyclopropanecarboxylate (0.050 g, 0.096 mmol), In(OTf)<sub>3</sub> (0.016 g, 0.028 mmol) and DCM (3 mL) were mixed according to general method A to yield a white solid (0.038 g, 76.0%) after 2 h. [m.p. 166–168°C] R<sub>f</sub> 0.38 (40% EtOAc/Hex). *Diastereomeric ratio:* (2.8:1). <sup>1</sup>H NMR (300 MHz, CDCl<sub>3</sub>) δ 8.52 – 8.46 (m, 1.35), 7.79 – 7.58 (m, 7.24), 7.41 – 7.26 (m, 2.90), 7.18 – 7.13 (m, 0.89), 7.00 – 6.93 (m, 2.37), 6.86 – 6.72 (m, 2.97), 4.70 (t, *J* = 4.1 Hz, 1), 4.48 (dd, *J* = 8.3, 5.1 Hz, 0.35), 3.85 – 3.80 (m, 0.84), 3.79 – 3.63 (m, 11.93), 3.54 (s, 1.09), 3.02 – 2.90 (m, 1.23), 2.88 – 2.71 (m, 3.21), 2.61 – 2.50 (m, 0.57), 2.44 – 2.33 (m, 1.73). <sup>13</sup>C NMR (75 MHz, CDCl<sub>3</sub>) δ 169.6, 169.2, 168.0, 165.3, 165.1, 158.8, 158.7, 135.5, 135.3, 134.7, 134.6, 133.8, 132.5, 131.9, 131.9, 130.4, 130.0, 129.1, 128.3, 125.1, 125.0, 124.5, 124.4, 123.1, 123.0, 118.4, 118.2, 116.8, 116.7, 115.7, 115.2, 114.2, 114.1, 55.2, 55.2, 52.7, 52.5, 49.6, 47.0, 37.7, 36.9, 36.8, 35.3, 33.7, 33.2, 23.1, 22.8. IR: 3047.1 (w), 2947.1 (w), 2847.1 (w), 1766.03 (w), 1751.74 (m), 1708.8 (s), 1618.4 (m), 1504.1 (m), 1451.7 (m), 1376.6 (s), 1245.9 (s), 1032.6 (s), 837.3 (m), 715.9 (s) cm<sup>-1</sup>. HRMS (ESI) M/Z+ Calc. 522.1791, Obs. 522.1791.

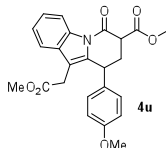

**Methyl 10-(2-methoxy-2-oxoethyl)-9-(4-methoxyphenyl)-6-oxo-6,7,8,9-tetrahydropyrido[1,2-a]indole-7-carboxylate (4u):** Methyl 1-(3-(2-methoxy-2-oxoethyl)-1H-indole-1-carbonyl)-2-(4-methoxyphenyl)cyclopropanecarboxylate (0.070 g, 0.167 mmol), In(OTf)<sub>3</sub> (0.028 g, 0.049 mmol) and DCM (3 mL) were combined according to general method A to afford 4u as a brown oil (0.062 g, 88.0%) after 3 h. R<sub>f</sub> 0.45 (40% EtOAc/Hex). *Diastereomeric ratio:* (2.0:1). <sup>1</sup>H NMR (300 MHz, CDCl<sub>3</sub>) δ 8.56 – 8.47 (m, 1.45), 7.56 – 7.48 (m, 1.05), 7.44 – 7.28 (m, 3.67), 7.18 – 7.11 (m, 1.06), 7.01 – 6.90 (m, 2.29), 6.88 – 6.78 (m, 3.02), 4.66 (t, *J* = 4.5 Hz, 1), 4.40 (dd, *J* = 9.7, 5.1 Hz, 0.48), 3.90 – 3.81 (m, 1.32), 3.81 – 3.78 (m, 7.54), 3.73 – 3.67 (m, 1.32), 3.64 (s, 1.44), 3.55 (s, 1.42), 3.53 (s, 2.98), 3.52 (s, 0.31), 3.43 (d, *J* = 17.3 Hz, 1.59), 3.32 (d, *J* = 17.7 Hz, 0.85), 3.02 – 2.69 (m, 2.34), 2.58 – 2.38 (m, 1.62). <sup>13</sup>C NMR (75 MHz, CDCl<sub>3</sub>) δ 170.8, 170.6, 169.4, 169.1, 165.2, 158.9, 158.8, 136.3, 135.8, 134.6, 134.5, 132.3, 131.9, 130.3, 129.9, 129.2, 128.5, 125.2, 125.2, 124.5, 124.4, 118.4, 118.0, 116.7, 114.2, 114.1, 112.3, 112.0, 55.3, 52.7, 52.6, 52.0, 51.9, 50.1, 47.2, 38.5, 35.4, 34.0, 33.2, 29.7, 29.4. IR: 3013.8 (w), 2918.6 (w), 2832.8 (w), 1747.0 (s), 1737.7 (s), 1699.3 (s), 1613.6 (m), 1518.4 (m), 1456.5 (s), 1366.0 (s), 1245.6 (s), 1152.1 (s), 1032.6 (s), 837.3 (m), 731.8 (s) cm<sup>-1</sup>. HRMS (ESI) M/Z+ Calc. 421.1525, Obs. 421.1522.

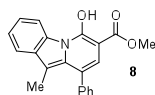

**Methyl 6-hydroxy-10-methyl-9-phenylpyrido[1,2-a]indole-7-carboxylate (8):** Methyl 2-bromo-1-(3-methyl-1H-indole-1-carbonyl)-2-phenylcyclopropanecarboxylate (0.060 g, 0.145 mmol), In(OTf)<sub>3</sub> (0.0245 g, 0.043 mmol) and DCM (3 mL) were combined according to general method A to afford 8 as a yellow-green oil (0.013 g, 28.5%) after 4 h. R<sub>f</sub> 0.55 (20% EtOAc/Hex). <sup>1</sup>H NMR (300 MHz, CDCl<sub>3</sub>) δ 12.12 (s, 1H), 8.57 – 8.50 (m, 1H), 7.86 (s, 1H), 7.71 – 7.66 (m, 1H), 7.63 – 7.46 (m, 2H), 7.38 – 7.32 (m, 1H), 7.23 – 7.06 (m, 3H), 6.95 (m, 1H), 3.98 (s, 3H), 2.45 (d, *J* = 1.1 Hz, 3H). <sup>13</sup>C NMR (75 MHz, CDCl<sub>3</sub>) δ 170.9, 160.7, 138.5, 134.6, 130.3, 128.7, 127.4, 126.5, 125.4, 124.3, 123.7, 123.4, 122.1, 119.4, 119.0, 112.0,

110.5, 105.0, 52.5, 9.7. **IR:** 3600-2800 (br), 2960.3 (m), 2923.7 (m), 2847.4 (m), 1657.1 (s), 1649.7 (s), 1525.7 (m), 1449.7 (s), 1334.3 (m), 1321.1 (m), 1255.4 (9s), 1226.3 (s), 1193.8 (w), 1122.6 (m), 1020 (m), 796.6 (s), 740.7 (s), 705.2 (m). **HRMS (ESI)** M/Z+ Calc. 331.1208, Obs. 331.1203.

### 3. References

1. Christie, B. D.; Rapoport, H. *J. Org. Chem.* **1985**, 50, 1239.
2. Fei, S.; Yong, Q.; *J. Am. Chem. Soc.* **2010**, 132, 14052.
3. Magolan, J.; Kerr, M.A. *Org. Lett.* **2008**, 10, 1437.
4. González-Bobes, F.; Fenster, M. D. B.; Kiau, S.; Kolla, L.; Kolotuchin, S.; Soumeillant, M. *Adv. Synth. Catal.* **2008**, 350.

### 4. Characterization/Spectra

I\_mac\_146  
File: hmc/franco/cavitt/I\_mac\_146.fid  
Pulse Sequence: sZpu1  
Solvent: cdcl3  
Ambient Temperature  
Operator: cavitt  
File: I\_mac\_146  
Mercury-300 "r2d2"  
Relax. delay 1.000 sec  
Pulse 30.0 degrees  
Acc. time 3.550 sec  
Width 4893.1 Hz  
23 repetitions  
OBSERVE M1, 300.2237110 MHz  
DATA PROCESSING  
FT size 45526  
Total time 8 min, 34 sec

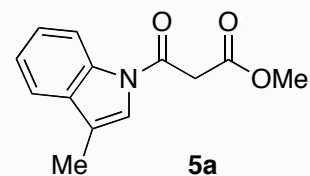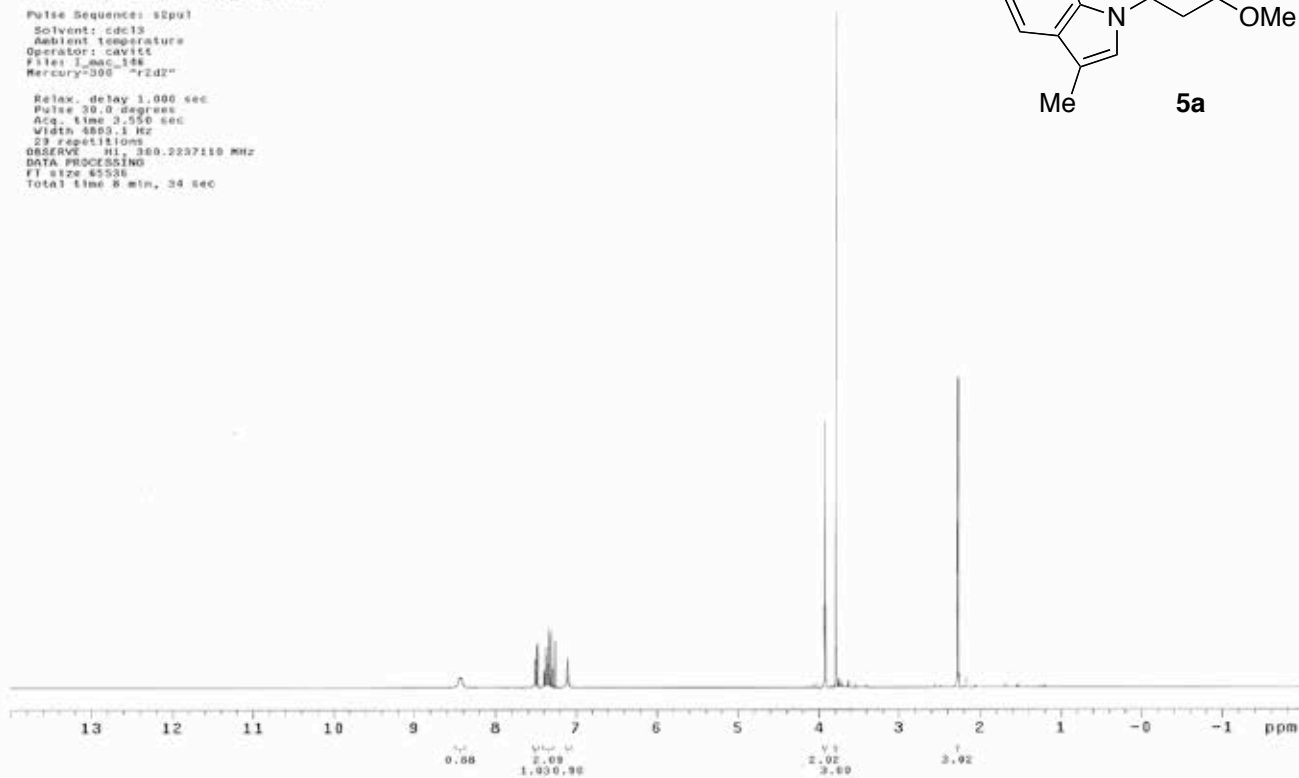

I\_mac\_146\_130  
File: hmc/franco/cavitt/I\_mac\_146\_130.fid  
Pulse Sequence: sZpu1  
Solvent: cdcl3  
Ambient Temperature  
Operator: cavitt  
File: I\_mac\_146\_130  
Mercury-300 "r2d2"  
Relax. delay 1.000 sec  
Pulse 30.0 degrees  
Acc. time 1.303 sec  
Width 10315.4 Hz  
1883 repetitions  
OBSERVE C13, 75.4813158 MHz  
DECOUPLE M1, 300.2251667 MHz  
Power 49 dB  
continuously on  
WALTZ-16 modulated  
DATA PROCESSING  
Line broadening 0.5 Hz  
FT size 65536  
Total time 1 hr, 42 min, 58 sec

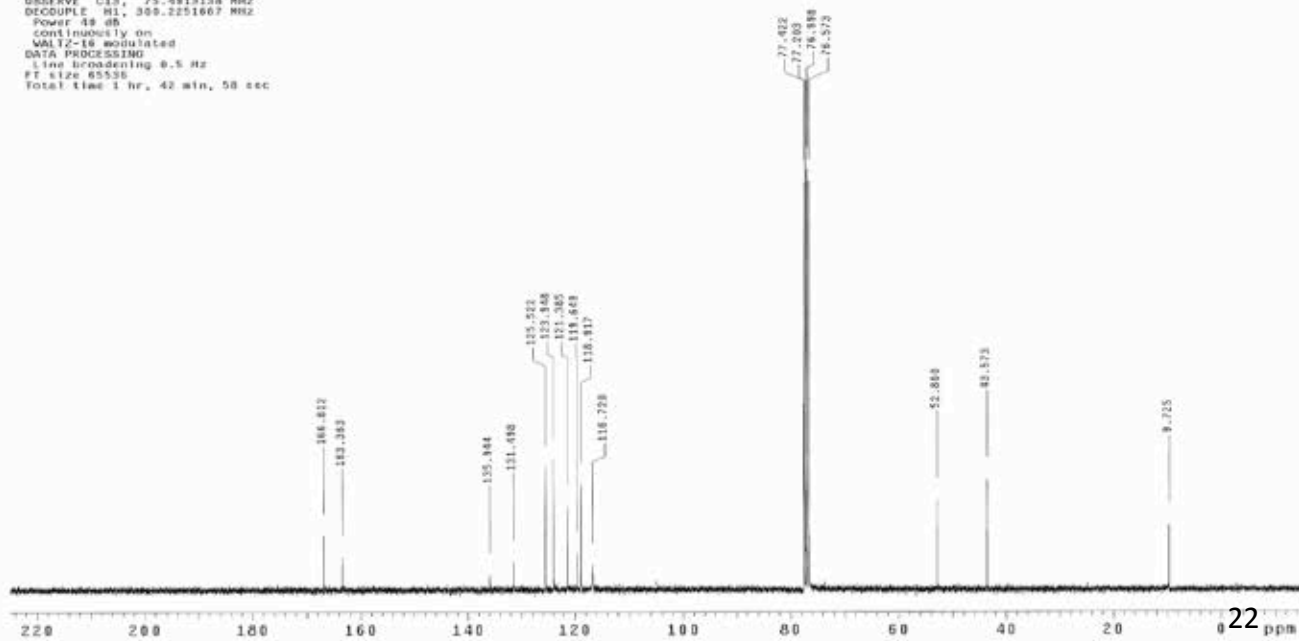

Std Proton parameters  
Sample: NS-4-DVP-188-B  
File: sp  
Pulse Sequence: zgpg30  
Solvent: cdcl3  
Ambient temperature  
Operator: dpatt11  
Mercury-300 "r2d3"  
Relax. delay 1.000 sec  
Pulse 32.0 degrees  
Acq. time 3.558 sec  
Width 4883.1 Hz  
18 repetitions  
OBSERVE H1, 300.2237117 MHz  
DATA PROCESSING  
FT size 85538  
Total time 1 min, 16 sec

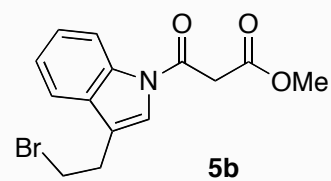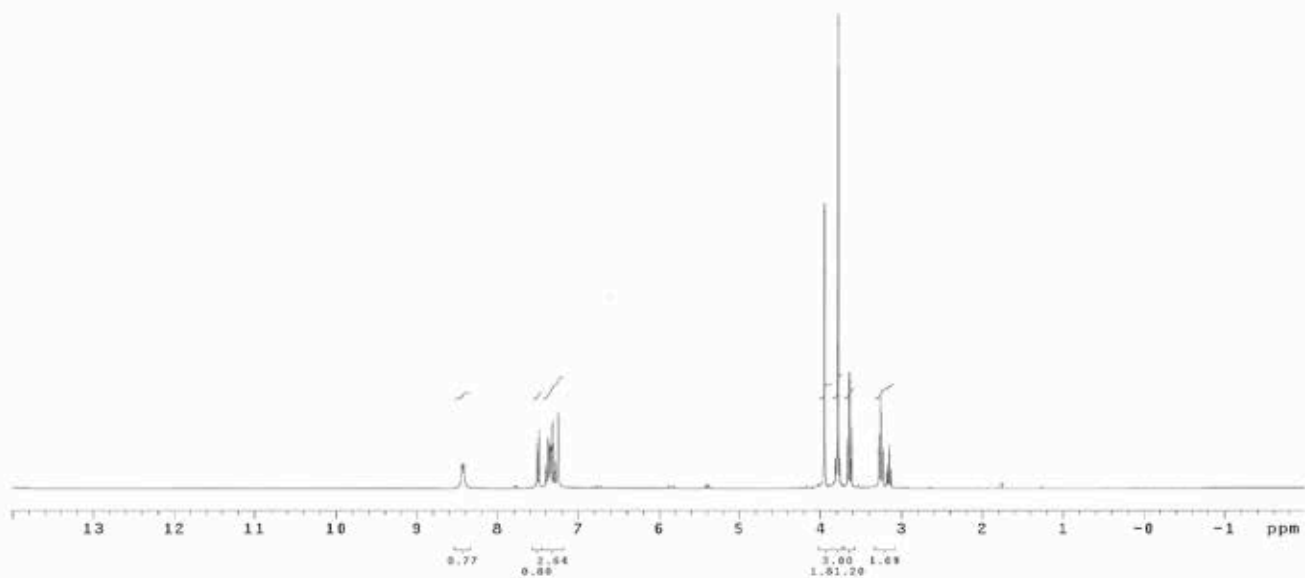

Std Carbon experiment  
Sample: NS-4-DVP-188-B  
File: sp  
Pulse Sequence: zgpg30  
Solvent: cdcl3  
Ambient temperature  
Operator: dpatt11  
Mercury-300 "r2d3"  
Relax. delay 1.000 sec  
Pulse 30.0 degrees  
Acq. time 1.301 sec  
Width 18115.3 Hz  
132 repetitions  
OBSERVE C13, 75.4813225 MHz  
DECOUPLE H1, 300.2251667 MHz  
Power 60 dB  
continuously on  
WALTZ-16 modulated  
DATA PROCESSING  
Line broadening 0.5 Hz  
FT size 85536  
Total time 10 min, 45 sec

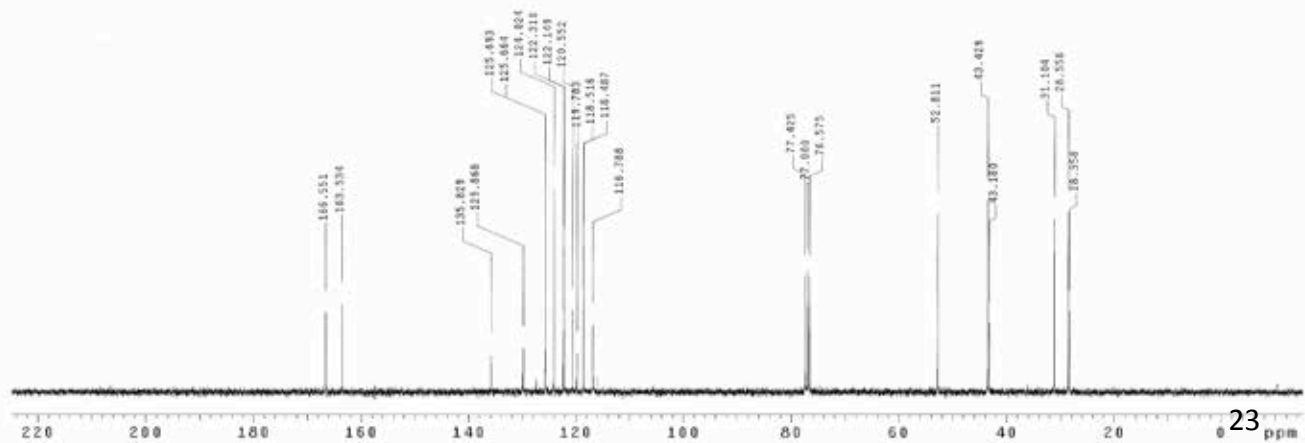

3-nphth-ester  
File: xp  
Pulse Sequence: s2pul  
Solvent: cdcl3  
Ambient temperature  
Operator: caw11  
Mercury-300 "r202"  
Relax. delay 1.000 sec  
Pulse 30.0 degrees  
Acq. time 3.550 sec  
Width 4000.1 Hz  
41 repetitions  
OBSERVE HI, 300.2185001 MHz  
DATA PROCESSING  
FT size 65536  
Total time 8 min, 34 sec

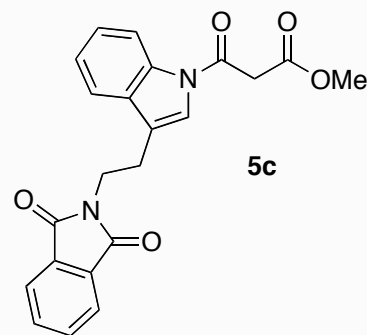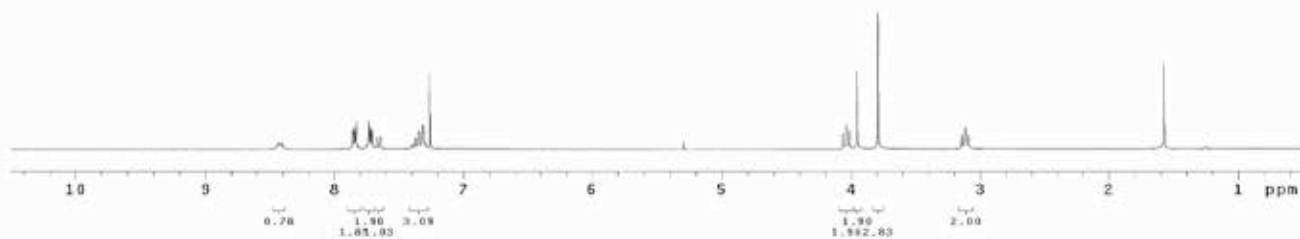

Std Carbon experiment  
Sample: I-MAC-188-II  
File: xp  
Pulse Sequence: s2pul  
Solvent: cdcl3  
Ambient temperature  
Operator: dpatt1  
Mercury-300 "r202"  
Relax. delay 1.000 sec  
Pulse 30.0 degrees  
Acq. time 1.301 sec  
Width 18215.3 Hz  
258 repetitions  
OBSERVE CD3, 75.4913164 MHz  
DECUPLE HI, 300.2251067 MHz  
Power 40 dB  
continuously on  
WALTZ-16 modulated  
DATA PROCESSING  
line broadening 0.5 Hz  
FT size 65536  
Total time 10 min, 45 sec

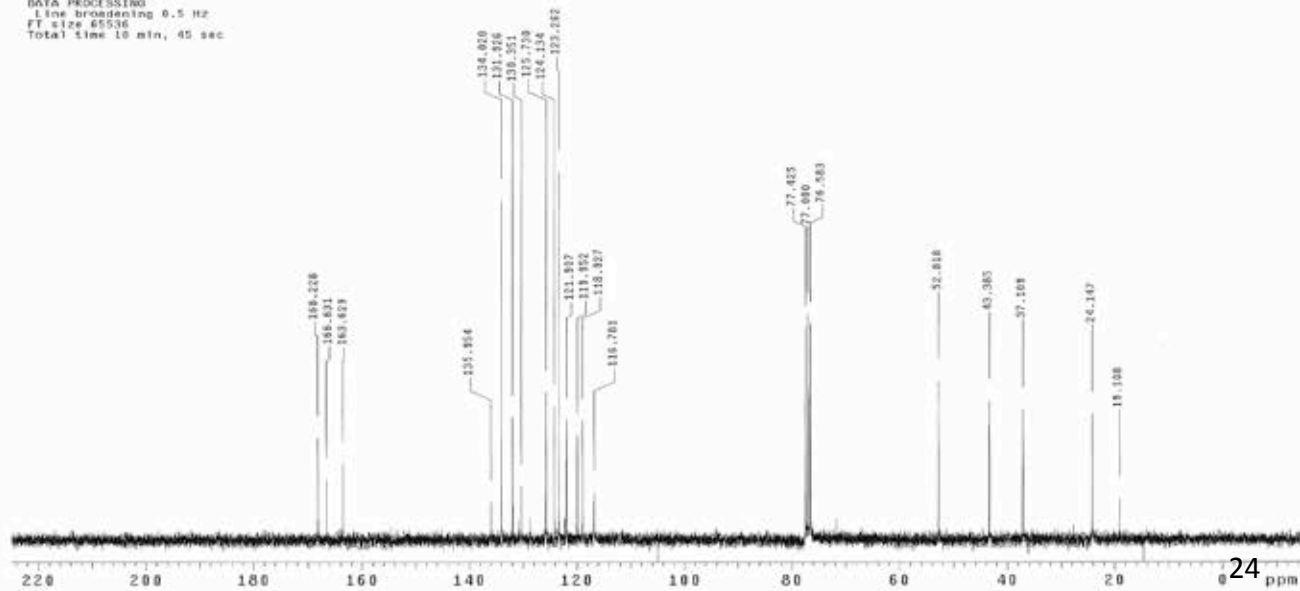



Std Proton parameters  
Sample: 1  
File: xp  
Pulse Sequence: s2pu1  
Solvent: cdcl3  
Ambient temperature  
Operator: dpat11  
Mercury-300 "r2d2"  
Relax. delay 1.000 sec  
Pulse 30.0 degrees  
Acq. time 3.550 sec  
Width 4803.1 Hz  
16 repetitions  
OBSERVE H1, 300.2207167 MHz  
DATA PROCESSING  
FT size 45536  
Total time 1 min, 16 sec

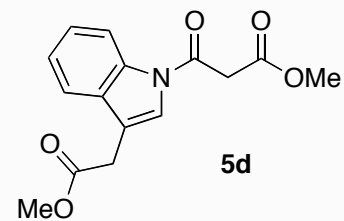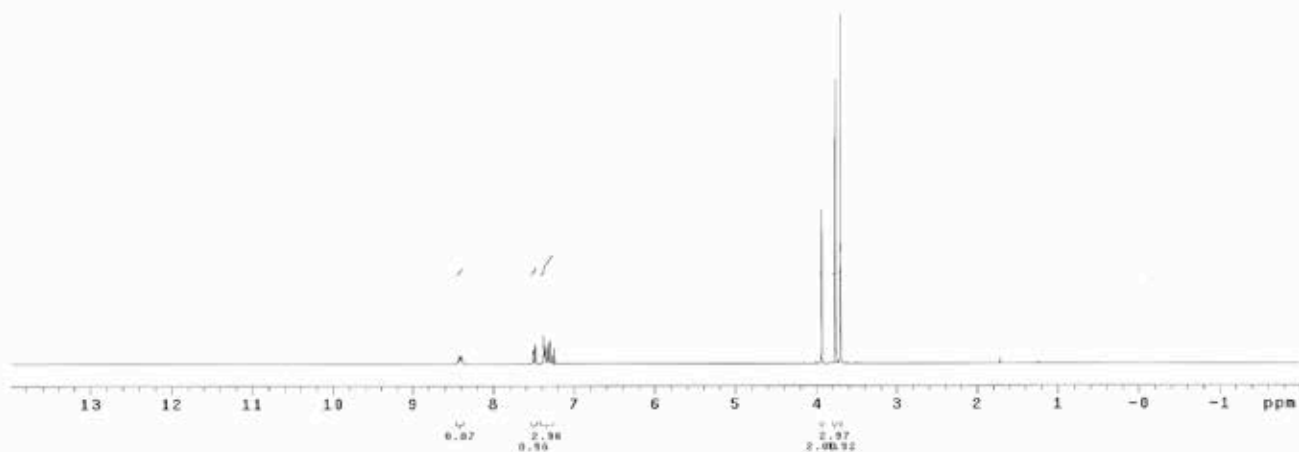

Std Carbon experiment  
Sample: 1  
File: xp  
Pulse Sequence: s2pu1  
Solvent: cdcl3  
Ambient temperature  
Operator: dpat11  
Mercury-300 "r2d2"  
Relax. delay 1.000 sec  
Pulse 30.0 degrees  
Acq. time 1.301 sec  
Width 18115.8 Hz  
122 repetitions  
OBSERVE C13, 76.4833181 MHz  
DECOUPLE H1, 300.2201667 MHz  
Power 40 dB  
continuous on  
WALTZ-16 modulated  
DATA PROCESSING  
Line broadening 0.5 Hz  
FT size 45536  
Total time 10 min, 45 sec

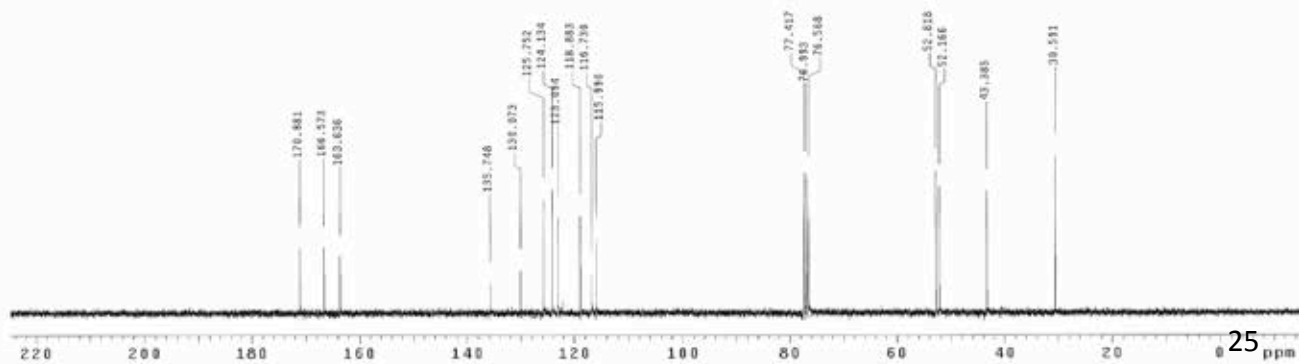

Std Proton parameters  
Sample: NS-5-DVP-88-B-H  
File: xp  
Pulse Sequence: s2pul  
Solvent: cdcl3  
Temp: 29.6 C / 293.1 K  
Operator: dpat11  
Mercury-300 "r2d2"  
Relax. delay 1.000 sec  
Pulse 39.8 degrees  
Acq. time 3.550 sec  
Width 4803.1 Hz  
16 repetitions  
OBSERVE H1, 300.2185882 MHz  
DATA PROCESSING  
F1 size 65536  
Total time 1 min, 16 sec

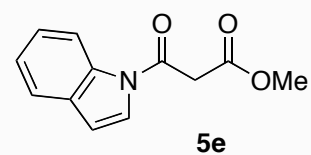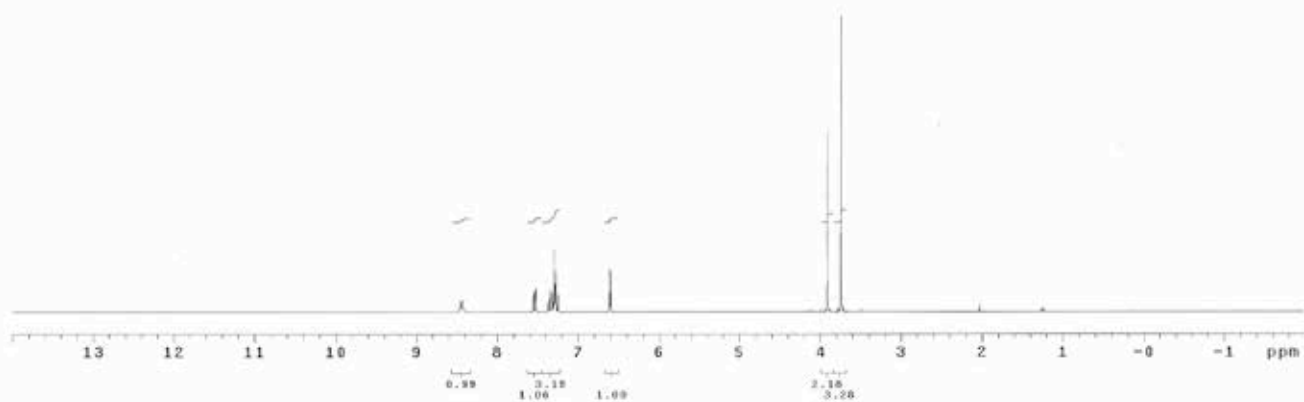

Std Carbon experiment  
Sample: NS-5-DVP-88-B-H  
File: xp  
Pulse Sequence: s2pul  
Solvent: cdcl3  
Temp: 29.6 C / 293.1 K  
Operator: dpat11  
Mercury-300 "r2d2"  
Relax. delay 1.000 sec  
Pulse 39.8 degrees  
Acq. time 1.303 sec  
Width 18115.9 Hz  
64 repetitions  
OBSERVE C13, 75.4906236 MHz  
DECOUPLE H1, 300.2185481 MHz  
Power 49 dB  
CONTINUOUSLY ON  
WALTZ-16 modulated  
DATA PROCESSING  
Line broadening 0.5 Hz  
F1 size 65536  
Total time 10 min, 45 sec

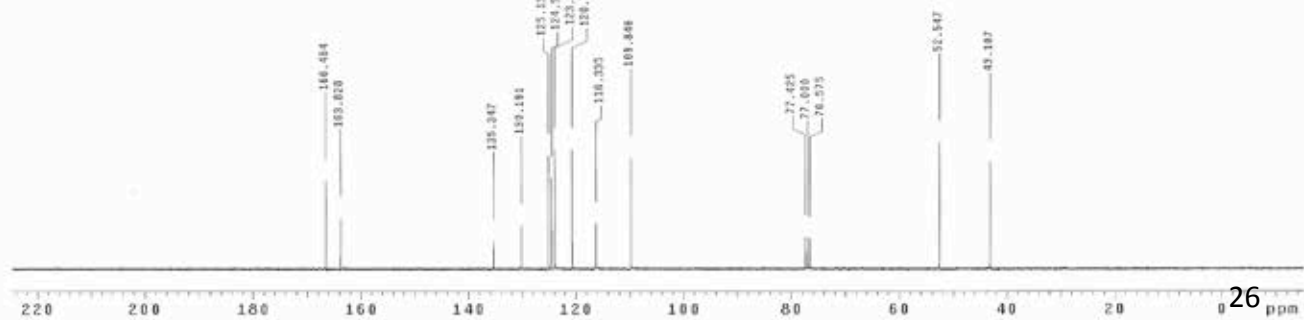

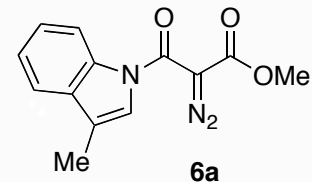

I\_mac\_154  
 File: home/franco/cavitt/I\_mac\_154.fid  
 Pulse Sequence: s2pu1  
 Solvent: cdcl3  
 Ambient temperature  
 Operator: cavitt  
 File: I\_mac\_154  
 Mercury-300 "r1d2"  
 Relax, delay 1.000 sec  
 Pulse 30.0 degrees  
 Acq. time 3.558 sec  
 Width 4803.1 Hz  
 32 repetitions  
 OBSERVE H1, 309.2237111 MHz  
 DATA PROCESSING  
 FT size 45536  
 Total time 8 min, 34 sec

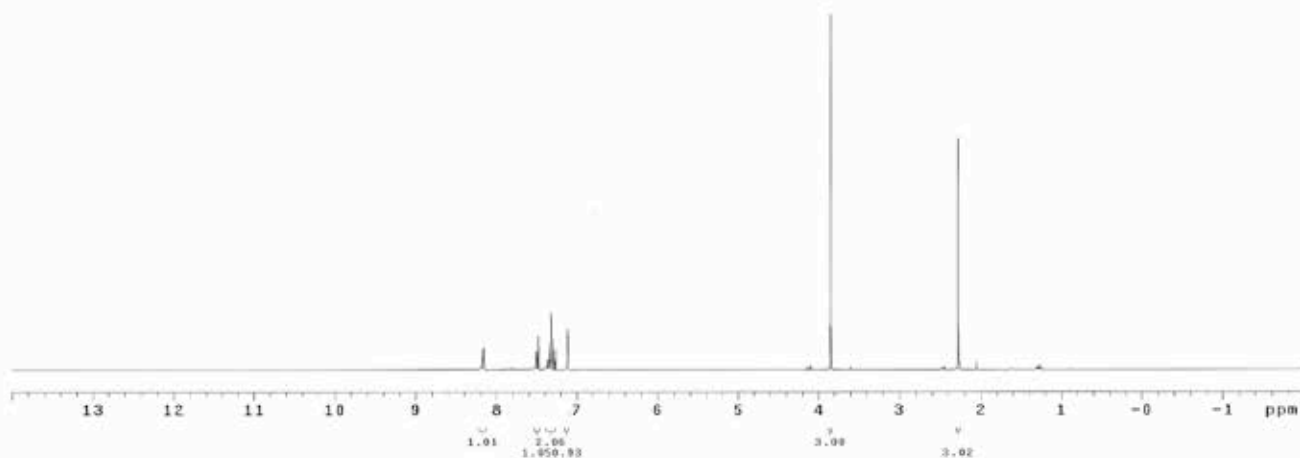

I\_mac\_154\_130  
 File: home/franco/cavitt/I\_mac\_154\_130.fid  
 Pulse Sequence: s2pu1  
 Solvent: cdcl3  
 Ambient temperature  
 Operator: cavitt  
 File: I\_mac\_154\_130  
 Mercury-300 "r2d2"  
 Relax, delay 1.000 sec  
 Pulse 30.0 degrees  
 Acq. time 1.381 sec  
 Width 18115.9 Hz  
 528 repetitions  
 OBSERVE C13, 75.4813123 MHz  
 DECOUPL H1, 309.2251667 MHz  
 Power 40 dB  
 continuously on  
 WALTZ-16 modulated  
 DATA PROCESSING  
 Line broadening 8.5 Hz  
 FT size 45536  
 Total time 21 min, 3 sec

| INDEX | FREQUENCY | PPM     | HEIGHT |
|-------|-----------|---------|--------|
| 1     | 12184.8   | 161.537 | 21.8   |
| 2     | 11987.3   | 158.922 | 13.8   |
| 3     | 10274.8   | 136.383 | 23.8   |
| 4     | 9858.8    | 131.894 | 34.8   |
| 5     | 9424.8    | 124.846 | 77.5   |
| 6     | 9333.7    | 123.718 | 84.0   |
| 7     | 8314.8    | 123.389 | 88.1   |
| 8     | 8300.3    | 118.958 | 89.7   |
| 9     | 8090.8    | 117.772 | 31.4   |
| 10    | 8737.1    | 115.738 | 101.3  |
| 11    | 7926.8    | 104.993 | -4.0   |
| 12    | 5849.5    | 77.486  | 80.4   |
| 13    | 5817.4    | 77.061  | 83.1   |
| 14    | 5785.4    | 76.636  | 82.0   |
| 15    | 5258.5    | 69.657  | 4.3    |
| 16    | 3970.1    | 52.656  | 64.5   |
| 17    | 733.9     | 9.722   | 43.8   |

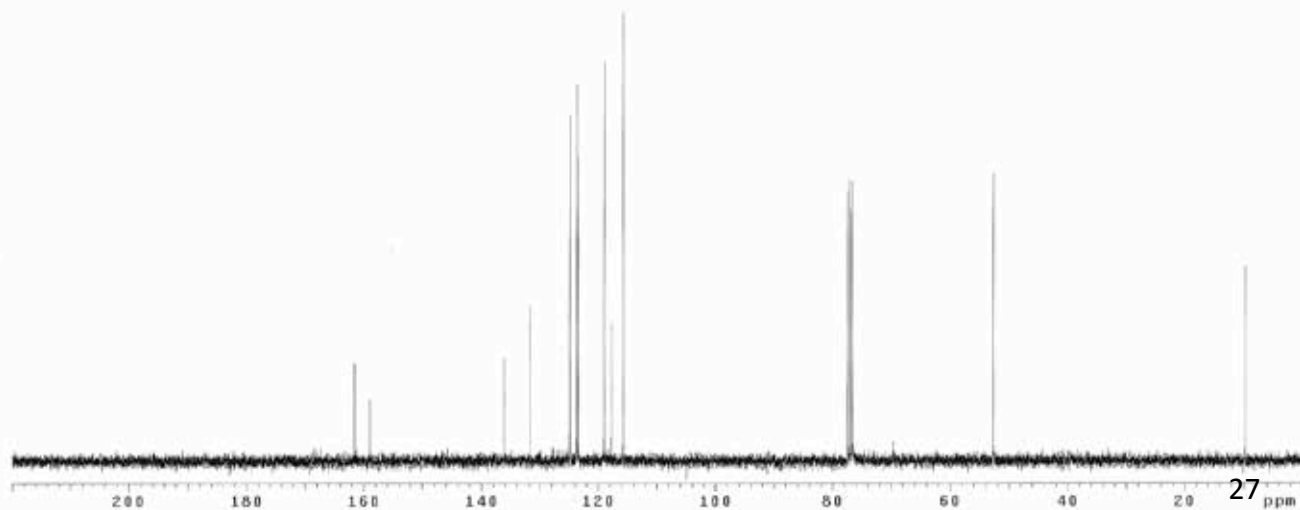

Std Proton parameters  
Sample: EtBrindole-diazo-H  
File: xp  
Pulse Sequence: s2pul  
Solvent: cdcl3  
Ambient temperature  
Operator: spat11  
Mercury-300 "r122"  
Relax. delay 1.000 sec  
Pulse 30.0 degrees  
Acq. time 3.250 sec  
Width 4003.1 Hz  
18 repetitions  
OBSERVE H1, 300.2185002 MHz  
DATA PROCESSING  
F1 size 65536  
Total time 1 min, 10 sec

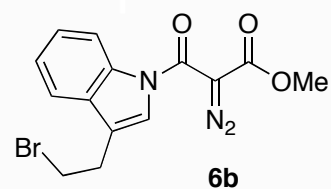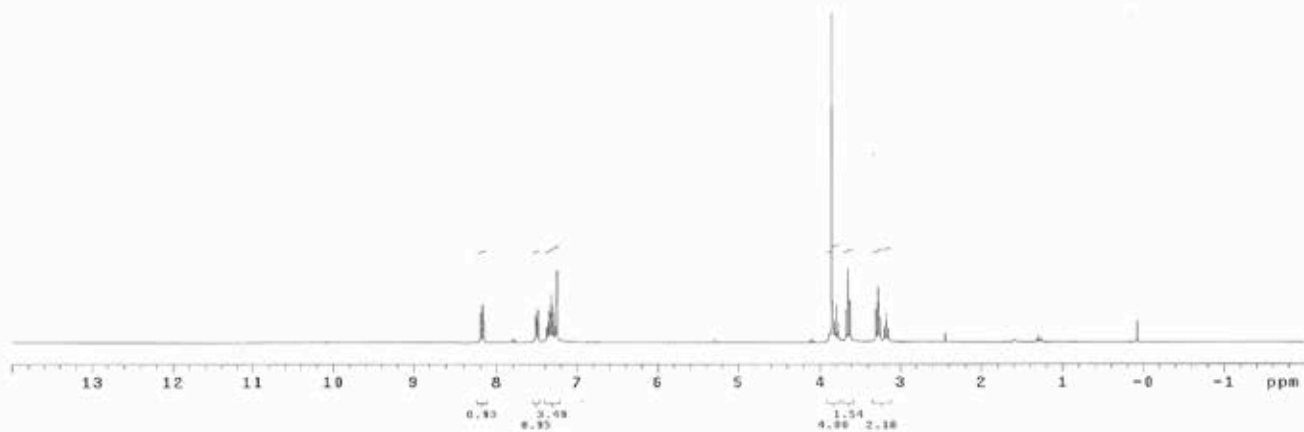

Std Carbon experiment  
Sample: EtBrindole-diazo-C  
File: xp  
Pulse Sequence: s2pul  
Solvent: cdcl3  
Temp: 22.0 C / 245.1 K  
Operator: spat11  
Mercury-300 "r122"  
Relax. delay 1.000 sec  
Pulse 30.0 degrees  
Acq. time 1.201 sec  
Width 10117.9 Hz  
410 repetitions  
OBSERVE C13, 75.4980048 MHz  
DECOUPLE H1, 300.2185401 MHz  
Power 50 dB  
continuously on  
WALTZ-16 modulated  
DATA PROCESSING  
Line broadening 0.5 Hz  
F1 size 65536  
Total time 42 min, 2 sec

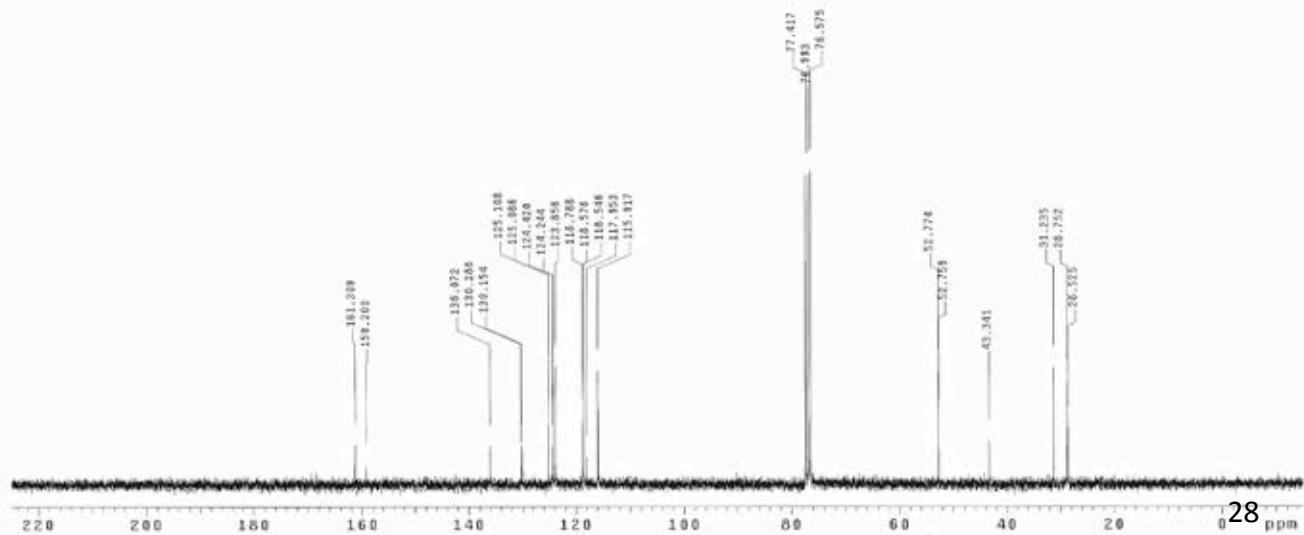

I\_mac\_201  
File: hove/france/cavitt/I\_mac\_201.fid  
Pulse Sequence: s2pul  
Solvent: cdcl3  
Ambient Temperature  
Operator: cavitt  
File: I\_mac\_201  
Mercury-300 "r2d2"  
Relax. delay 1.000 sec  
Pulse 30.0 degrees  
Acq. time 5.550 sec  
Width 4803.1 Hz  
48 repetitions  
OBSERVE H1, 300.2237168 MHz  
DATA PROCESSING  
FT size 65536  
Total time 5 min, 34 sec

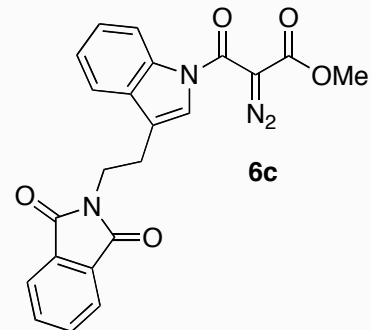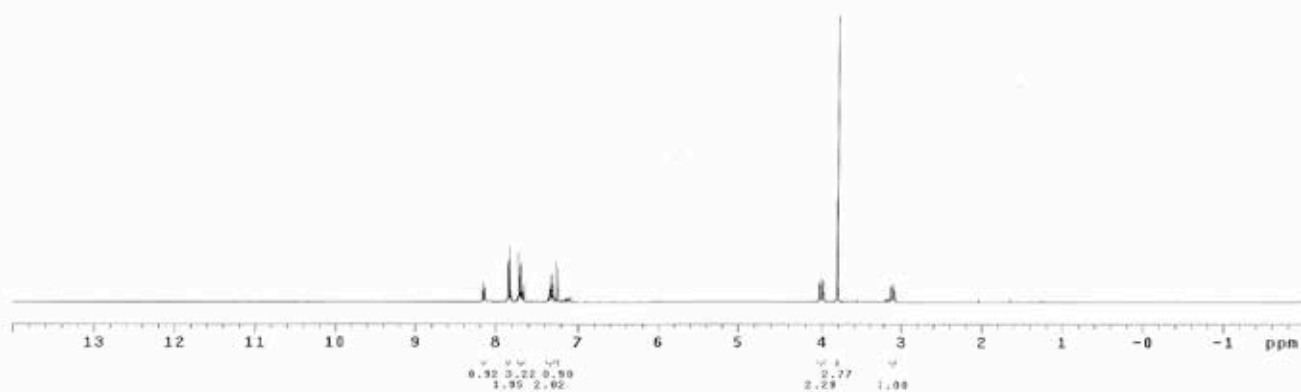

I\_mac\_201\_130  
File: hove/france/cavitt/I\_mac\_201\_130.fid  
Pulse Sequence: s2pul  
Solvent: cdcl3  
Ambient Temperature  
Operator: cavitt  
File: I\_mac\_201\_130  
Mercury-300 "r2d2"  
Relax. delay 1.000 sec  
Pulse 30.0 degrees  
Acq. time 1.331 sec  
Width 18115.5 Hz  
500 repetitions  
OBSERVE C13, 75.4913161 MHz  
DECOUPLE H1, 300.2251067 MHz  
Power 40 dB  
Continuously On  
WALTZ-16 modulated  
DATA PROCESSING  
Line broadening 0.5 Hz  
FT size 65536  
Total time 25 min, 44 sec

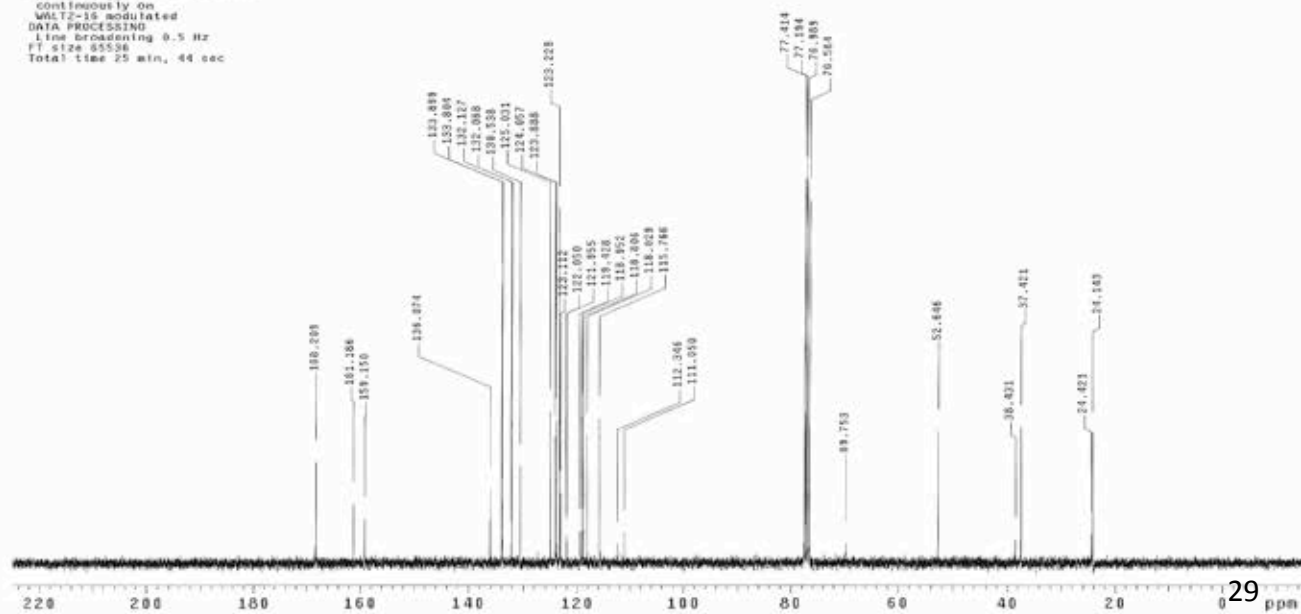

I\_mac\_200  
File: home/franco/cavitt/I\_mac\_200.fid  
Pulse Sequence: zgpg30  
Solvent: cdcl3  
Ambient Temperature  
Operator: cavitt  
File: I\_mac\_200  
Mercury-300 "r2d2"  
Relax. delay 1.000 sec  
Pulse 30.0 degrees  
Acq. time 3.550 sec  
Width 4863.1 Hz  
G1 repetitions  
OBSERVE H1, 200.2297111 MHz  
DATA PROCESSING  
FT size 45526  
Total time 8 min, 34 sec

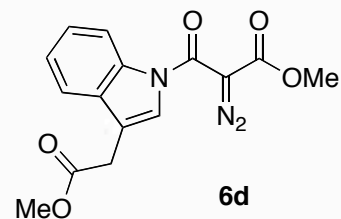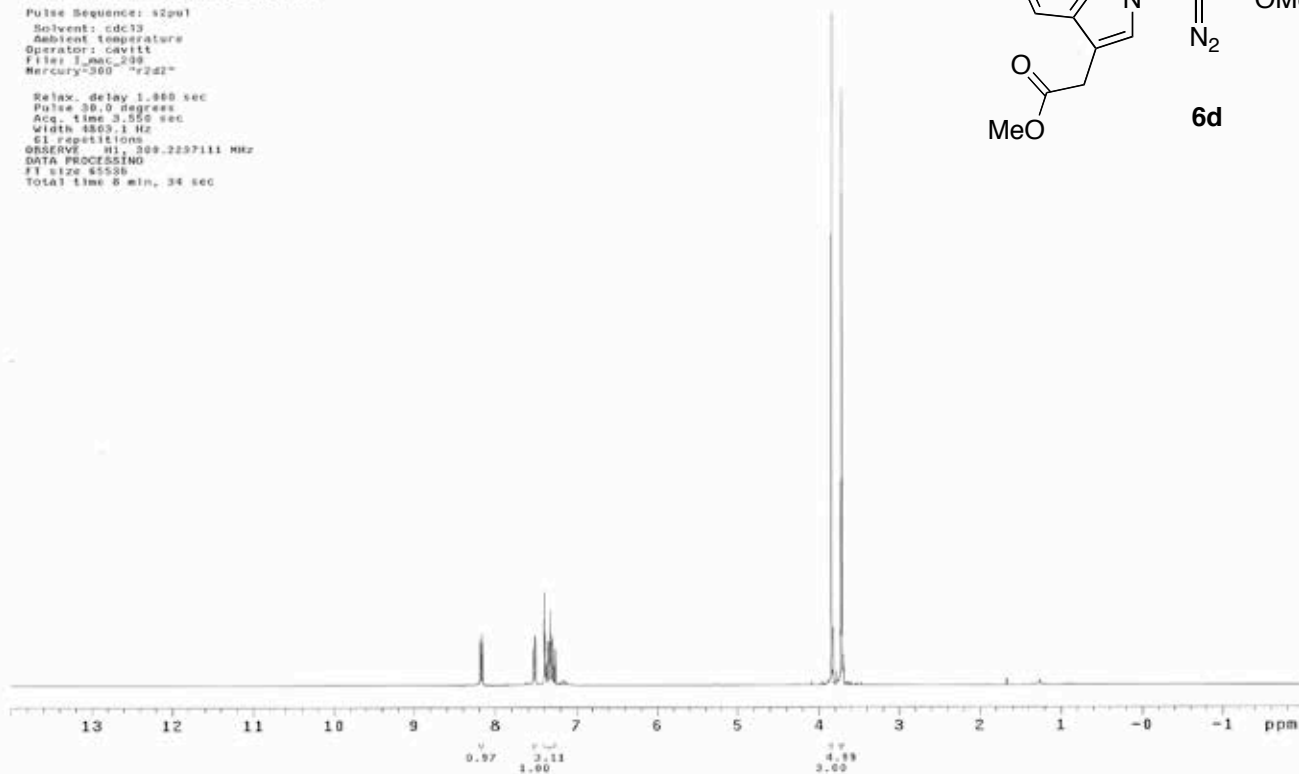

I\_mac\_200\_130  
File: home/franco/cavitt/I\_mac\_200\_130.fid  
Pulse Sequence: zgpg30  
Solvent: cdcl3  
Ambient Temperature  
Operator: cavitt  
File: I\_mac\_200\_130  
Mercury-300 "r2d2"  
Relax. delay 1.000 sec  
Pulse 30.0 degrees  
Acq. time 1.323 sec  
Width 10115.9 Hz  
360 repetitions  
OBSERVE C13, 75.4913164 MHz  
DECOUPLE H1, 200.2251067 MHz  
Power 40 dB  
continuously on  
WALTZ-16 modulated  
DATA PROCESSING  
Line broadening 0.5 Hz  
FT size 65536  
Total time 30 min, 53 sec

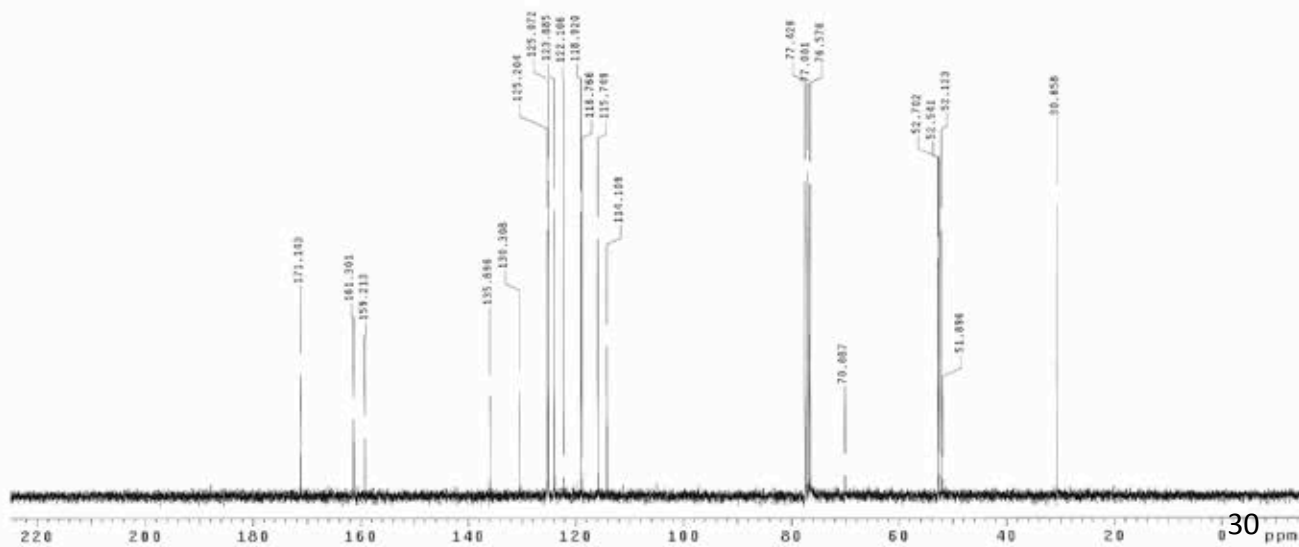

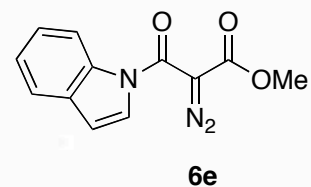

Sample: NS-5-DVP-88-C-H  
File: xp  
Pulse Sequence: szpul  
Solvent: cdcl3  
Temp: 29.9 C / 283.1 K  
Operator: dpat11  
Mercury-300 "r202"  
Relax. delay 1.000 sec  
Pulse 30.0 degrees  
Acq. time 3.558 sec  
Width 6803.1 Hz  
16 repetitions  
OBSERVE H1, 300.2165002 MHz  
DATA PROCESSING  
FT size 85536  
Total time 1 min, 16 sec

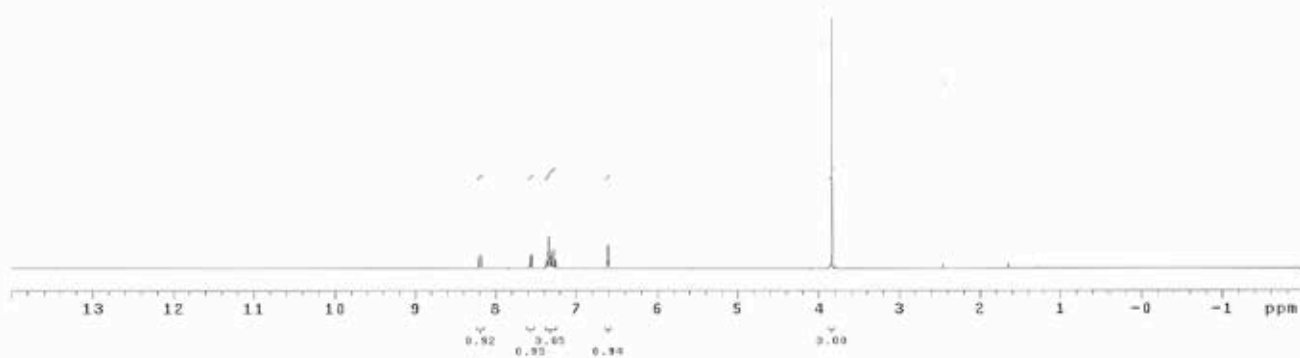

Std Carbon experiment  
Sample: NS-5-DVP-88-C-H  
File: xp  
Pulse Sequence: szpul  
Solvent: cdcl3  
Temp: 29.9 C / 283.1 K  
Operator: dpat11  
Mercury-300 "r202"  
Relax. delay 1.000 sec  
Pulse 30.6 degrees  
Acq. time 1.301 sec  
Width 16117.5 Hz  
180 repetitions  
OBSERVE C13, 75.4900067 MHz  
DECUPLE H1, 300.2165001 MHz  
Power 49 dB  
continuously on  
WALTZ-16 modulated  
DATA PROCESSING  
line broadening 0.5 Hz  
FT size 65536  
Total time 18 min, 45 sec

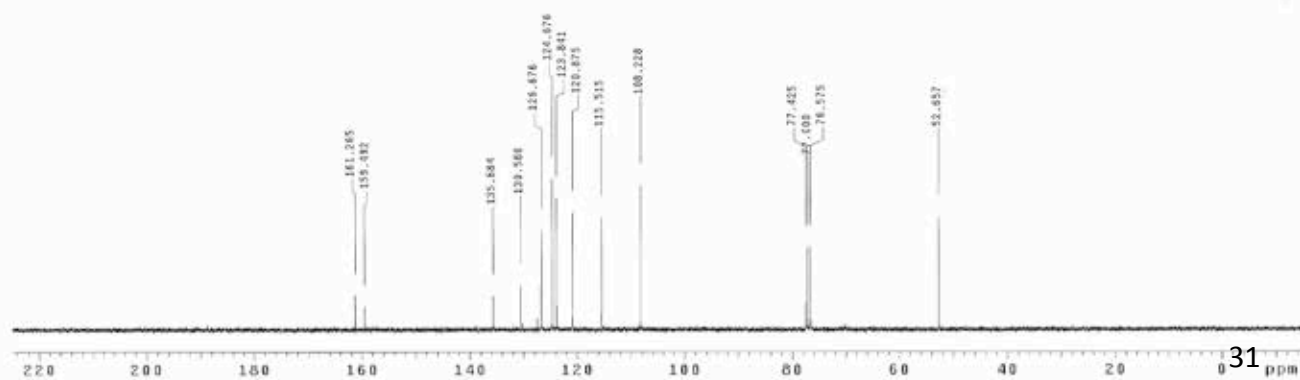

I\_mac\_168\_2  
Lower spot  
10N E10A2/hx  
File: hoxe/france/cavitt/I\_mac\_168\_2.fid  
Pulse Sequence: s2pul  
Solvent: cdcl3  
Ambient temperature  
Operator: cavitt  
File: I\_mac\_168\_2  
Mercury-300 "r202"  
Relax. delay 1.000 sec  
Pulse 39.0 degrees  
Acq. time 3.550 sec  
Width 8000.1 Hz  
34 repetitions  
OBSERVE M1, 300.2237117 MHz  
DATA PROCESSING  
F1 size 85536  
Total time 8 min, 34 sec

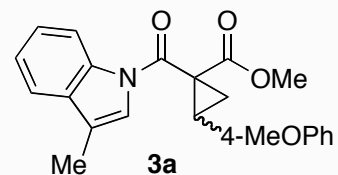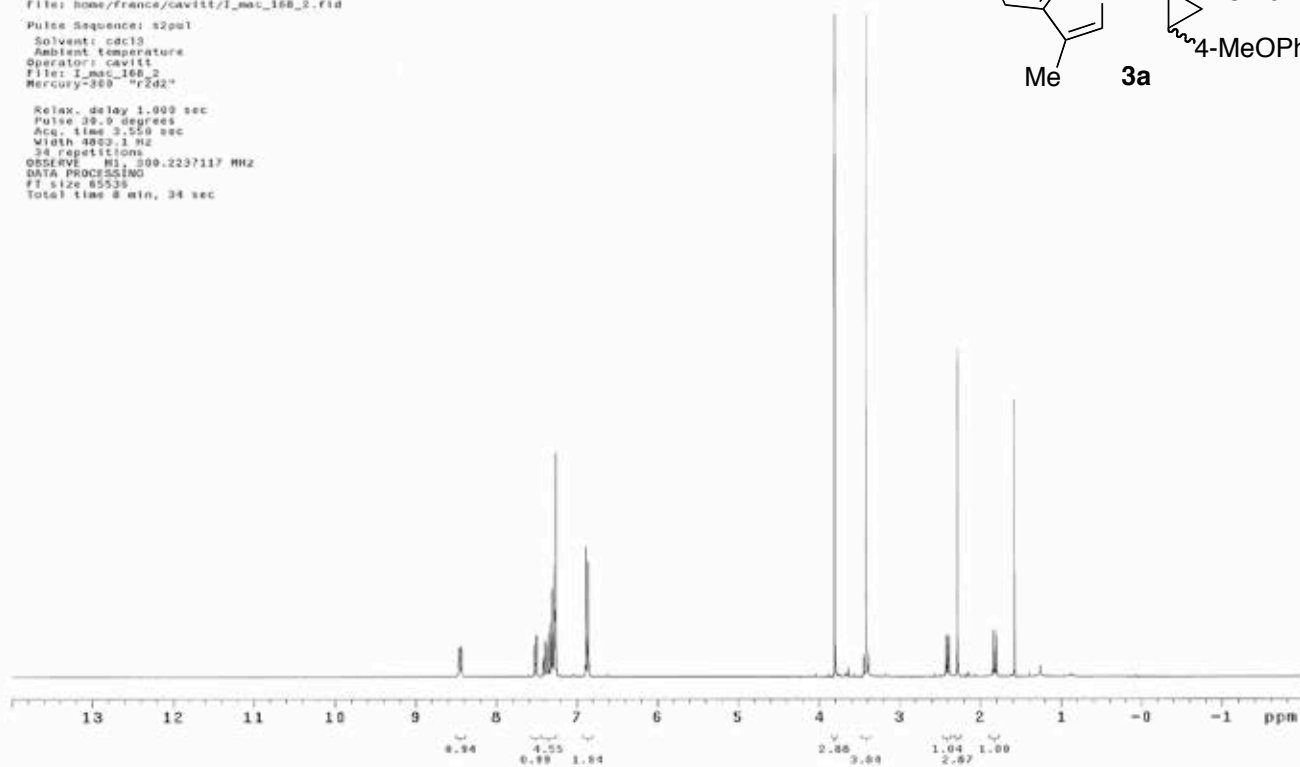

| INDEX | FREQUENCY | PPM     | HEIGHT |
|-------|-----------|---------|--------|
| 1     | 12682.1   | 167.934 | 5.7    |
| 2     | 12515.1   | 165.782 | 4.4    |
| 3     | 11993.2   | 158.869 | 6.5    |
| 4     | 10287.7   | 138.012 | 3.4    |
| 5     | 8926.8    | 131.522 | 5.6    |
| 6     | 8824.3    | 130.133 | 27.3   |
| 7     | 8518.6    | 126.089 | 7.9    |
| 8     | 8462.8    | 125.349 | 11.7   |
| 9     | 8345.0    | 123.789 | 10.6   |
| 10    | 8169.2    | 121.860 | 8.1    |
| 11    | 8096.2    | 119.168 | 5.7    |
| 12    | 8073.5    | 118.868 | 10.7   |
| 13    | 8786.6    | 118.517 | 5.5    |
| 14    | 8574.3    | 113.580 | 28.2   |
| 15    | 8044.9    | 77.425  | 34.8   |
| 16    | 8812.8    | 77.000  | 38.3   |
| 17    | 8786.6    | 76.575  | 36.1   |
| 18    | 4165.3    | 55.176  | 14.1   |
| 19    | 3982.9    | 52.759  | 10.2   |
| 20    | 2976.7    | 38.431  | 7.7    |
| 21    | 2848.6    | 31.111  | 7.8    |
| 22    | 1414.3    | 18.735  | 8.8    |
| 23    | 737.1     | 8.764   | 9.7    |

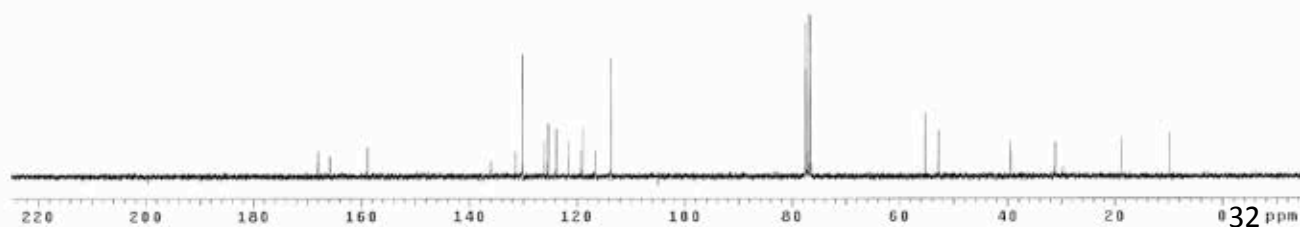

32 ppm



Std Proton parameters  
Sample: NB-S-DVP-51-A-H  
File: xp  
Pulse Sequence: s2p91  
Solvent: cdcl3  
Temp: 22.6 C / 295.1 K  
Operator: dpat11  
Mercury-300 "r202"  
Relax. Delay 1.000 sec  
Pulse 30.0 degrees  
Acq. time 3.350 sec  
Width 4003.1 Hz  
IS repetitions  
OBSERVE H1, 300.2207250 MHz  
DATA PROCESSING  
FT size 65536  
Total time 1 min, 16 sec

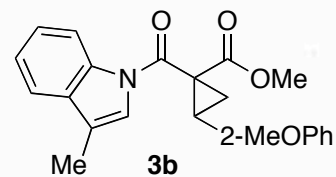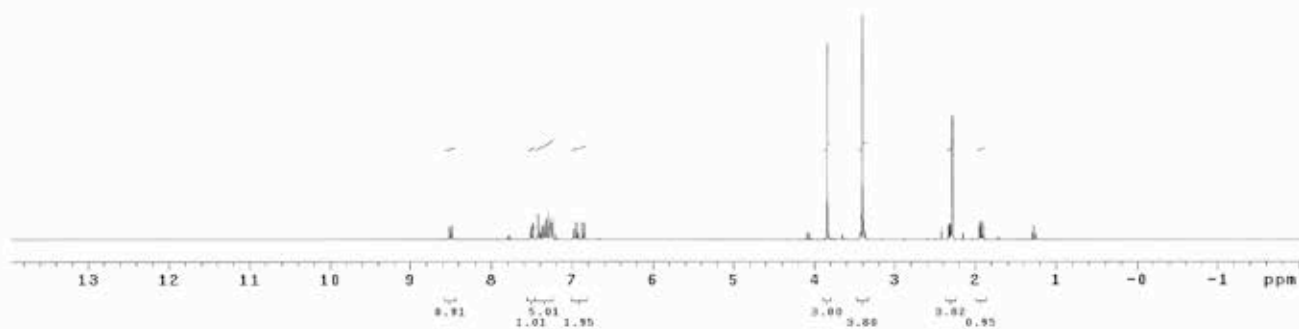

Std Carbon experiment  
Sample: NB-S-DVP-51-A-H  
File: xp  
Pulse Sequence: s2p91  
Solvent: cdcl3  
Temp: 22.6 C / 295.1 K  
Operator: dpat11  
Mercury-300 "r202"  
Relax. Delay 1.000 sec  
Pulse 30.0 degrees  
Acq. time 1.301 sec  
Width 16115.3 Hz  
IS repetitions  
OBSERVE C13, 75.4913264 MHz  
DECOUPLE H1, 300.2251067 MHz  
Power 40 dB  
continuously on  
WALTZ-16 modulated  
DATA PROCESSING  
Line broadening 0.5 Hz  
FT size 65536  
Total time 10 min, 45 sec

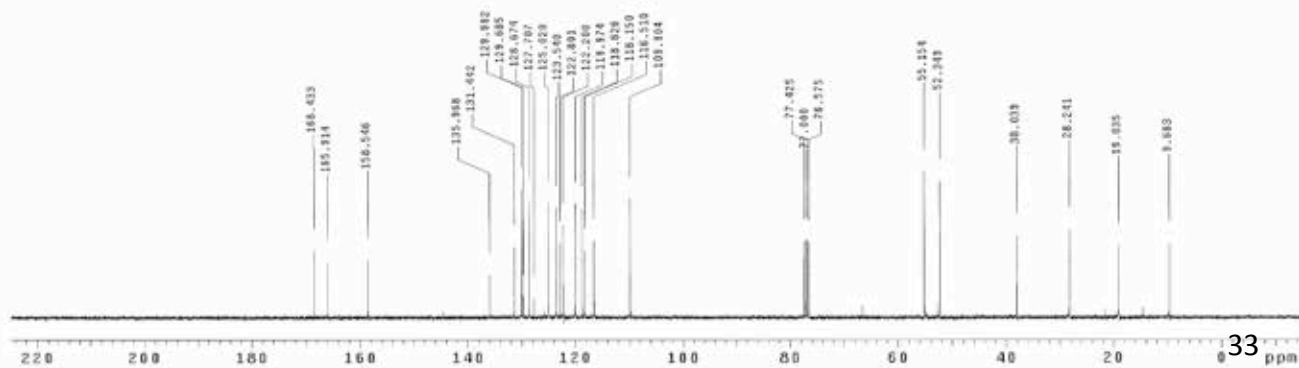

II-MAC-54-N  
 File: xp  
 Pulse Sequence: s2pul  
 Solvent: cdcl3  
 Ambient Temperature  
 Operator: cavitt  
 Mercury-300 "r2d2"  
 Relax. delay 1.000 sec  
 Pulse 30.0 degrees  
 Acq. time 3.550 sec  
 Width 4883.1 Hz  
 41 repetitions  
 OBSERVE H1, 300.2104887 MHz  
 DATA PROCESSING  
 FT size 65536  
 Total time 6 min, 34 sec

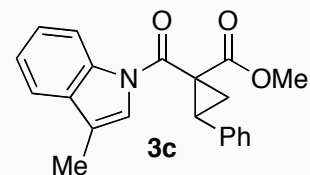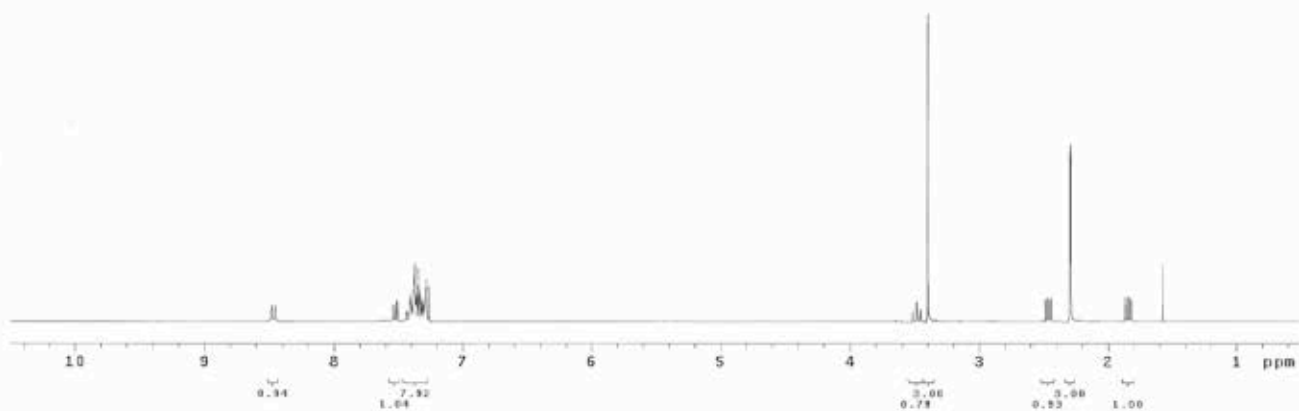

II-MAC-54-C  
 File: xp  
 Pulse Sequence: s2pul  
 Solvent: cdcl3  
 Ambient Temperature  
 Operator: cavitt  
 Mercury-300 "r2d2"  
 Relax. delay 1.000 sec  
 Pulse 30.0 degrees  
 Acq. time 1.301 sec  
 Width 18115.0 Hz  
 110 repetitions  
 OBSERVE C13, 75.4360963 MHz  
 DECOUPLE H1, 300.2139481 MHz  
 Power 43 dB  
 Continuously on  
 WALTZ-16 modulated  
 DATA PROCESSING  
 Line broadening 0.5 Hz  
 FT size 45536  
 Total time 3580 hr, 7 min, 46 sec

| INDEX | FREQUENCY | PPM     | HEIGHT |
|-------|-----------|---------|--------|
| 1     | 12674.2   | 167.093 | 6.9    |
| 2     | 12504.5   | 165.644 | 8.7    |
| 3     | 10268.2   | 136.020 | 9.1    |
| 4     | 10134.4   | 134.248 | 13.4   |
| 5     | 8928.7    | 131.524 | 7.7    |
| 6     | 8744.1    | 129.078 | 49.1   |
| 7     | 8076.1    | 128.177 | 37.9   |
| 8     | 8520.2    | 127.437 | 29.3   |
| 9     | 8484.3    | 125.372 | 22.7   |
| 10    | 8347.1    | 123.819 | 10.7   |
| 11    | 8165.2    | 121.410 | 11.9   |
| 12    | 8061.6    | 119.242 | 11.6   |
| 13    | 8974.5    | 118.683 | 21.6   |
| 14    | 8786.5    | 116.525 | 10.1   |
| 15    | 5840.8    | 77.425  | 57.1   |
| 16    | 5812.7    | 77.000  | 81.4   |
| 17    | 5780.7    | 76.575  | 58.2   |
| 18    | 3882.2    | 52.752  | 23.7   |
| 19    | 2981.0    | 39.889  | 13.8   |
| 20    | 2380.1    | 31.528  | 15.4   |
| 21    | 1599.6    | 19.543  | 15.0   |
| 22    | 737.0     | 9.763   | 20.1   |

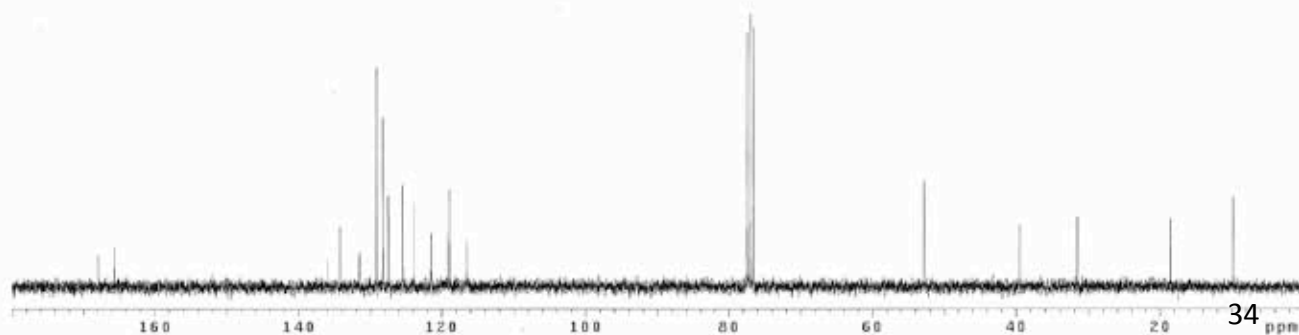

I\_mac\_181\_top  
 File: home/franco/cavitt/I\_mac\_181\_top.fid  
 Pulse Sequence: s2pul  
 Solvent: cdcl3  
 Ambient Temperature  
 Operator: cavitt  
 File: I\_mac\_181\_top  
 Mercury-300 "r1d2"  
 Relax, delay 1.000 sec  
 Pulse 30.0 degrees  
 Acc. time 3.558 sec  
 Width 4893.1 Hz  
 50 repetitions  
 OBSERVE H1, 300.2237186 MHz  
 DATA PROCESSING  
 FT size 65536  
 Total time 9 min, 34 sec

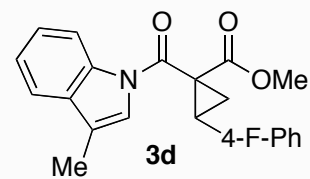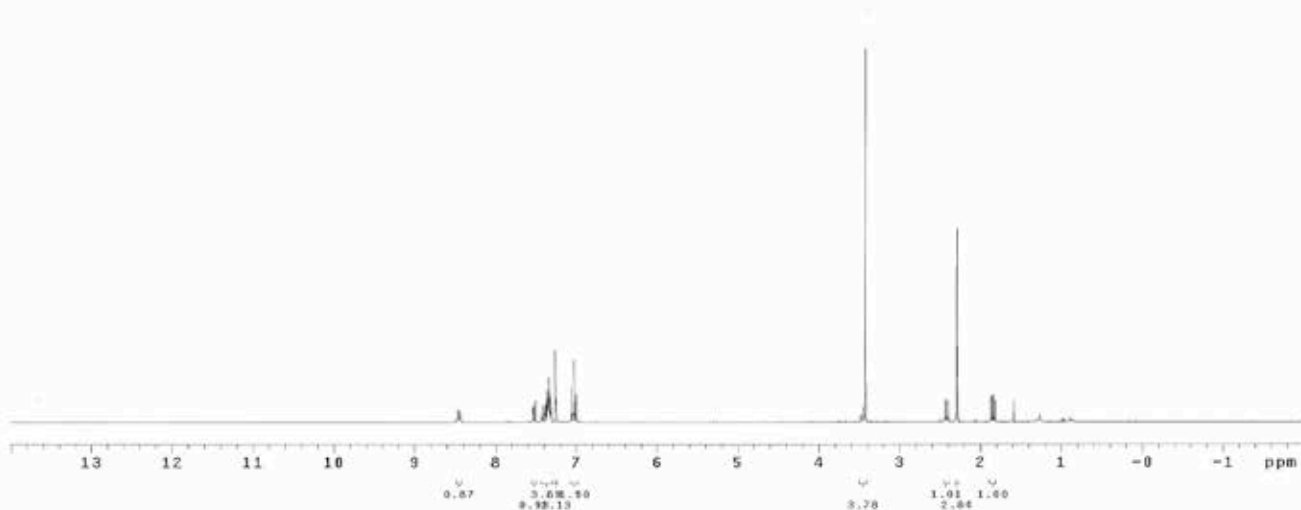

I\_mac\_181\_top\_13C  
 File: home/franco/cavitt/I\_mac\_181\_top\_13C.fid  
 Pulse Sequence: s2pul  
 Solvent: cdcl3  
 Ambient Temperature  
 Operator: cavitt  
 File: I\_mac\_181\_top\_13C  
 Mercury-300 "r1d2"  
 Relax, delay 1.000 sec  
 Pulse 30.0 degrees  
 Acc. time 1.301 sec  
 Width 16115.9 Hz  
 500 repetitions  
 OBSERVE C13, 75.4813142 MHz  
 DECOUPLE H1, 300.2251667 MHz  
 Power 40 dB  
 continuously on  
 WALTZ-16 modulated  
 DATA PROCESSING  
 Line broadening 0.5 Hz  
 FT size 65536  
 Total time 25 min, 44 sec

| INDEX | FREQUENCY | PPM     | HEIGHT |
|-------|-----------|---------|--------|
| 1     | 12969.0   | 167.652 | 11.0   |
| 2     | 12489.0   | 165.044 | 9.4    |
| 3     | 12361.9   | 163.753 | 6.7    |
| 4     | 12315.8   | 163.494 | 5.8    |
| 5     | 10286.0   | 135.997 | 6.7    |
| 6     | 9326.0    | 131.522 | 11.2   |
| 7     | 8968.5    | 130.724 | 27.6   |
| 8     | 8860.2    | 130.614 | 27.2   |
| 9     | 8814.4    | 130.006 | 5.8    |
| 10    | 8811.0    | 129.970 | 7.0    |
| 11    | 8466.3    | 125.422 | 25.0   |
| 12    | 8351.0    | 123.877 | 23.8   |
| 13    | 8152.7    | 121.255 | 15.2   |
| 14    | 8012.7    | 119.267 | 19.9   |
| 15    | 8977.3    | 118.818 | 24.0   |
| 16    | 8794.8    | 116.502 | 5.4    |
| 17    | 8762.6    | 115.279 | 26.5   |
| 18    | 8681.0    | 114.883 | 28.5   |
| 19    | 8644.9    | 114.524 | 26.4   |
| 20    | 8612.4    | 114.188 | 60.8   |
| 21    | 8786.7    | 114.575 | 58.9   |
| 22    | 8805.5    | 114.847 | 20.2   |
| 23    | 2979.4    | 39.467  | 10.2   |
| 24    | 2321.0    | 38.745  | 14.7   |
| 25    | 1412.2    | 18.720  | 17.6   |
| 26    | 737.0     | 9.763   | 21.5   |

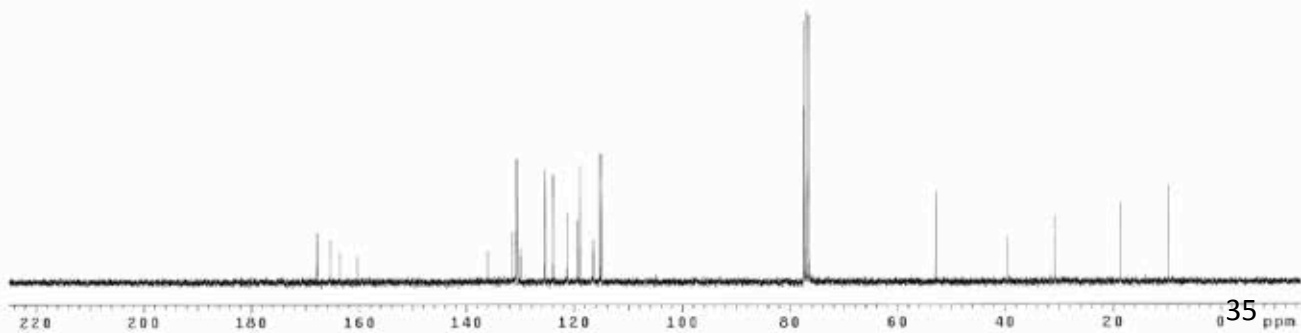

Std Proton parameters  
 File: home/franco/cavitt/I\_mac\_183.fid  
 Pulse Sequence: s2pul  
 Solvent: cdcl3  
 Ambient temperature  
 Operator: Cavitt  
 File: I\_mac\_183  
 Mercury-300 "r3d2"  
 Relax. delay 1.000 sec  
 Pulse 39.0 degrees  
 Acq. time 3.550 sec  
 Width 4853.1 Hz  
 12 repetitions  
 OBSERVE H1, 300.2257117 MHz  
 DATA PROCESSING  
 FT size 65536  
 Total time 8 min, 34 sec

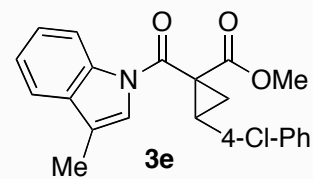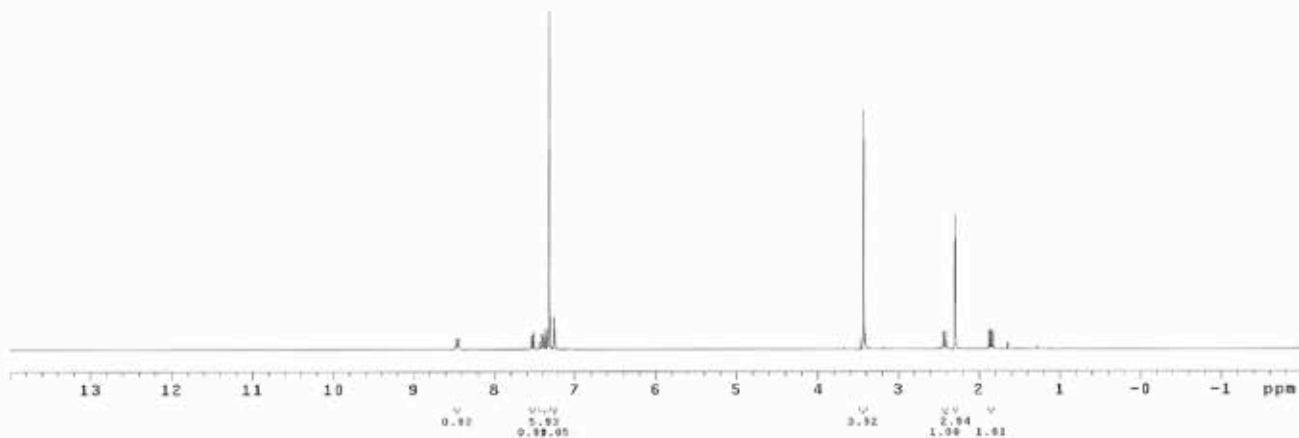

I\_mac\_183\_13C  
 File: home/franco/cavitt/I\_mac\_183\_13C.fid  
 Pulse Sequence: s2pul  
 Solvent: cdcl3  
 Ambient temperature  
 Operator: Cavitt  
 File: I\_mac\_183\_13C  
 Mercury-300 "r3d2"  
 Relax. delay 1.000 sec  
 Pulse 39.0 degrees  
 Acq. time 1.381 sec  
 Width 18115.3 Hz  
 385 repetitions  
 OBSERVE C13, 75.4813175 MHz  
 DECOUPLE H1, 300.2251667 MHz  
 Power 40 dB  
 continuously on  
 WALTZ-16 modulated  
 DATA PROCESSING  
 Line broadening 0.5 Hz  
 FT size 45536  
 Total time 25 min, 44 sec

| INDEX | FREQUENCY | PPM     | HEIGHT |
|-------|-----------|---------|--------|
| 1     | 12661.1   | 107.716 | 29.9   |
| 2     | 12478.1   | 105.282 | 21.5   |
| 3     | 10284.5   | 135.869 | 15.0   |
| 4     | 10064.3   | 133.318 | 22.1   |
| 5     | 10024.5   | 132.791 | 39.8   |
| 6     | 8326.7    | 131.894 | 24.1   |
| 7     | 8044.3    | 129.403 | 124.6  |
| 8     | 5989.5    | 128.355 | 126.1  |
| 9     | 4447.3    | 125.469 | 46.5   |
| 10    | 3351.2    | 123.071 | 46.4   |
| 11    | 3149.4    | 121.198 | 20.5   |
| 12    | 3013.9    | 118.403 | 31.5   |
| 13    | 8376.3    | 118.985 | 52.6   |
| 14    | 8792.2    | 118.467 | 19.3   |
| 15    | 5845.5    | 77.453  | 48.2   |
| 16    | 5813.4    | 77.088  | 43.5   |
| 17    | 5781.4    | 76.583  | 43.1   |
| 18    | 3960.7    | 52.063  | 48.4   |
| 19    | 2963.9    | 39.527  | 29.8   |
| 20    | 2324.9    | 30.797  | 29.6   |
| 21    | 1483.3    | 18.589  | 34.1   |
| 22    | 734.5     | 9.735   | 41.4   |

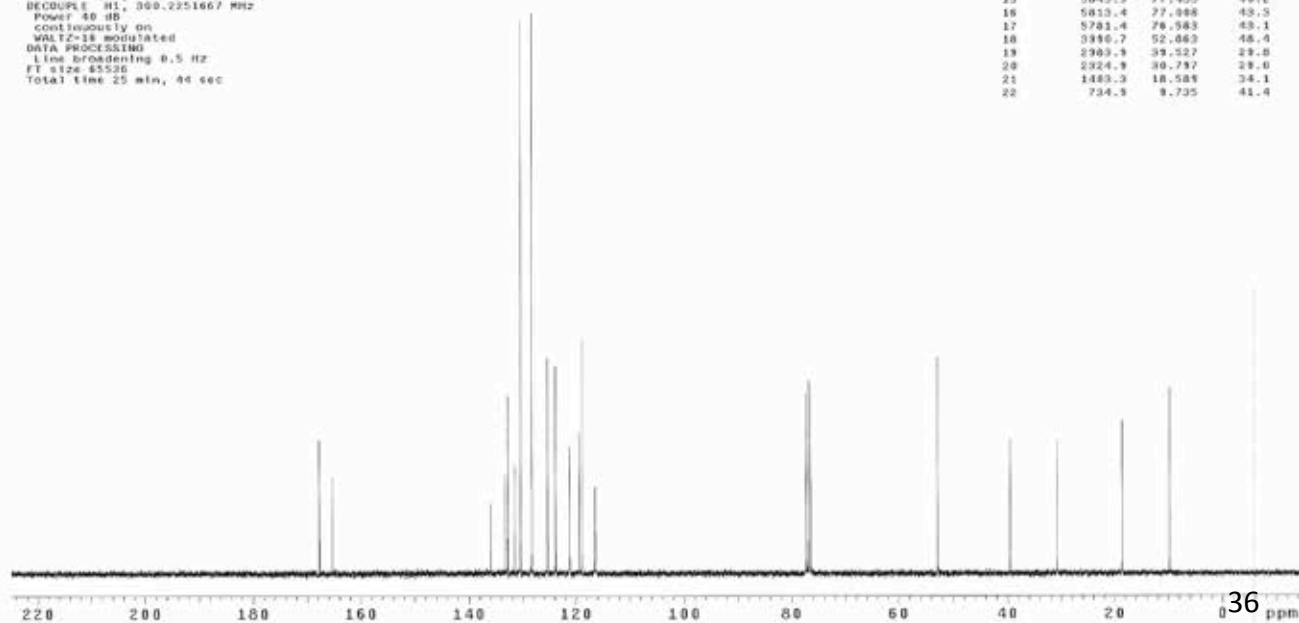

I\_mec\_190\_d  
 Nitro\_cyclopropyl  
 File: home/france/cavitt/I\_mec\_190\_d.fid  
 Pulse Sequence: s2pu1  
 Solvent: cdcl3  
 Ambient temperature  
 Operator: Cavitt  
 File: I\_mec\_190\_d  
 Mercury-300 "r2d2"  
 Relax, delay 1.000 sec  
 Pulse 30.0 degrees  
 Acq. time 3.550 sec  
 Width 4000.1 Hz  
 40 repetitions  
 OBSERVE M1, 300.2237110 MHz  
 DATA PROCESSING  
 FT size 65536  
 Total time 8 min, 34 sec

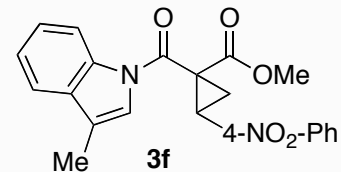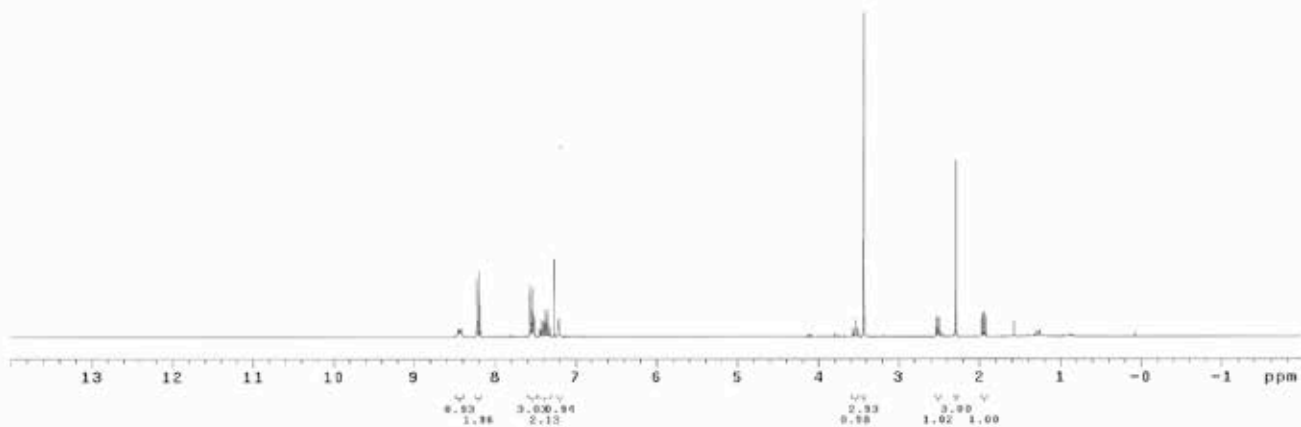

W02  
 File: home/france/cavitt/W02.fid  
 Pulse Sequence: s2pu1  
 Solvent: cdcl3  
 Ambient temperature  
 Operator: Cavitt  
 File: W02  
 Mercury-300 "r2d2"  
 Relax, delay 1.000 sec  
 Pulse 30.0 degrees  
 Acq. time 1.321 sec  
 Width 10115.3 Hz  
 340 repetitions  
 OBSERVE C13, 75.4813145 MHz  
 DECOUPLE M1, 300.2251007 MHz  
 Power 40 dB  
 Continuously On  
 WALTZ-16 modulated  
 DATA PROCESSING  
 Line broadening 0.5 Hz  
 FT size 65536  
 Total time 32 min, 57 sec

| INDEX | FREQUENCY | PPM     | HEIGHT |
|-------|-----------|---------|--------|
| 1     | 12844.7   | 167.489 | 19.0   |
| 2     | 12437.4   | 164.752 | 8.6    |
| 3     | 11116.6   | 147.248 | 7.9    |
| 4     | 10720.6   | 142.013 | 14.4   |
| 5     | 10266.7   | 135.971 | 5.2    |
| 6     | 9929.1    | 131.526 | 7.6    |
| 7     | 9817.4    | 130.947 | 51.7   |
| 8     | 9479.6    | 125.572 | 18.4   |
| 9     | 9305.7    | 124.063 | 17.1   |
| 10    | 8316.8    | 123.484 | 52.6   |
| 11    | 8129.6    | 120.338 | 9.7    |
| 12    | 8046.2    | 119.830 | 13.7   |
| 13    | 8964.8    | 119.018 | 13.9   |
| 14    | 8792.4    | 116.469 | 4.8    |
| 15    | 5844.6    | 77.421  | 67.7   |
| 16    | 5812.5    | 76.990  | 69.3   |
| 17    | 5760.4    | 76.571  | 68.0   |
| 18    | 4010.8    | 53.129  | 21.8   |
| 19    | 2010.4    | 26.983  | 14.3   |
| 20    | 2332.8    | 30.962  | 19.2   |
| 21    | 2240.5    | 29.679  | 6.0    |
| 22    | 1424.6    | 18.862  | 12.9   |
| 23    | 738.4     | 9.781   | 17.9   |

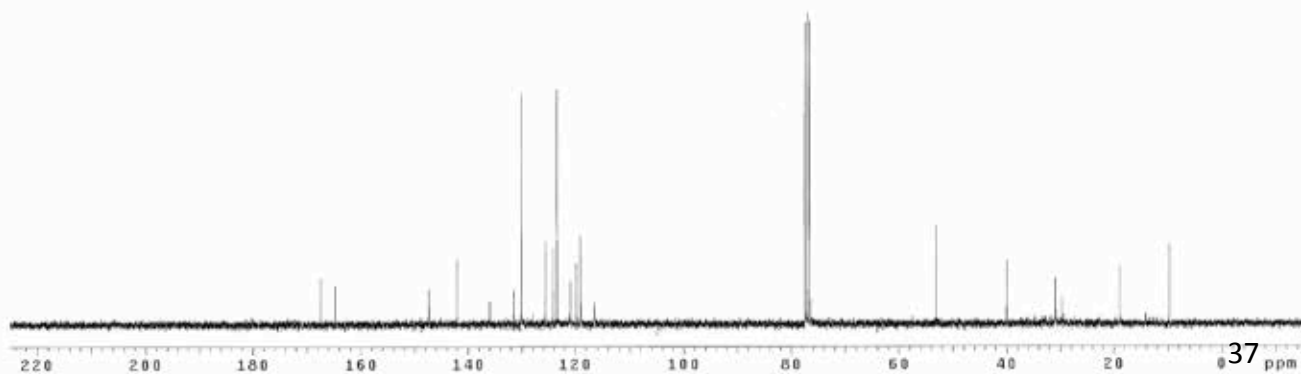

Std Proton parameters  
Sample: NB-5-DVP-52-B-H  
File: sp  
Pulse Sequence: zgpg30  
Solvent: cdcl3  
Temp: 22.0 C / 295.1 K  
Operator: dpatt11  
Mercury-300 "r1d2"  
Relax. delay 1.000 sec  
Pulse 30.0 degrees  
Acq. time 3.550 sec  
Width 4863.1 Hz  
16 repetitions  
OBSERVE F1: 300.2237177 MHz  
DATA PROCESSING  
F1 size 65526  
Total time 1 min, 16 sec

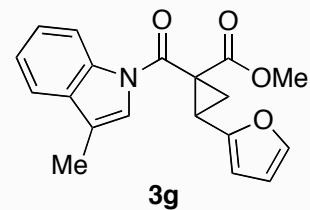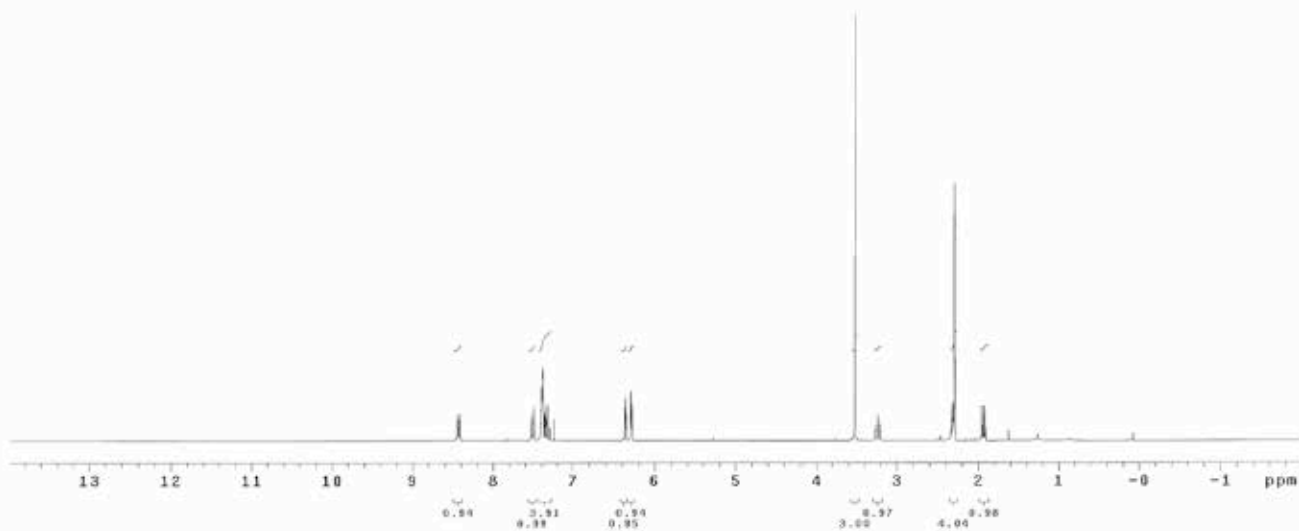

Std Carbon experiment  
Sample: NB-5-DVP-52-B-H  
File: sp  
Pulse Sequence: zgpg30  
Solvent: cdcl3  
Temp: 22.0 C / 295.1 K  
Operator: dpatt11  
Mercury-300 "r1d2"  
Relax. delay 1.000 sec  
Pulse 30.0 degrees  
Acq. time 1.393 sec  
Width 18115.9 Hz  
112 repetitions  
OBSERVE C13: 75.4813175 MHz  
DECOUPLE H1: 300.2251667 MHz  
Power 49 dB  
continuously on  
WALTZ-16 modulated  
DATA PROCESSING  
Line broadening 0.5 Hz  
F1 size 65536  
Total time 10 min, 45 sec

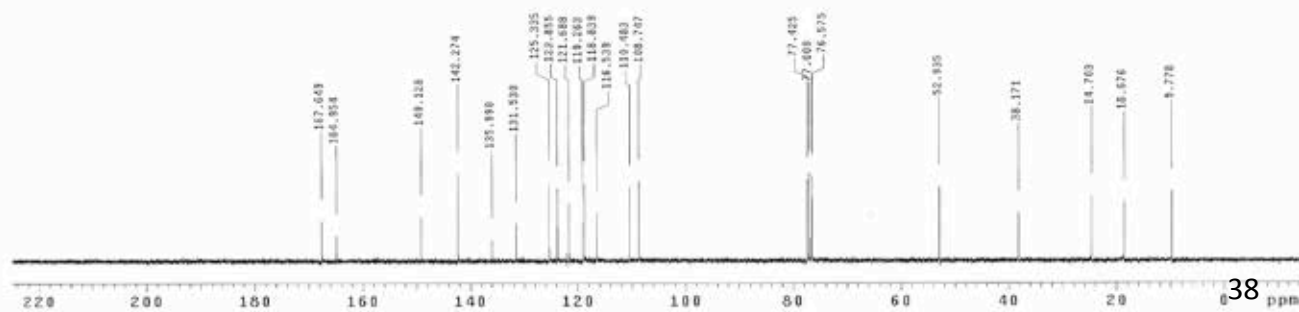

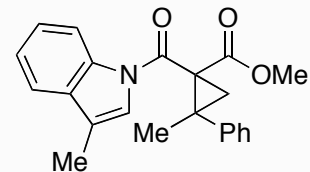

**3h**  
 7.5:1 mixture  
 of diastereomers

Std Proton parameters  
 Sample: NB-5-DVP-40-A-H  
 File: hcmw/france/dpat11/NB-5-DVP-40-A-HH.fid  
 Pulse Sequence: s2pul  
 Solvent: cdcl3  
 Temp: 30.0 C / 293.1 K  
 Operator: dpat11  
 File: NB-5-DVP-40-A-HH  
 Mercury-300 "r2d2"  
 Relax. delay 1.000 sec  
 Pulse 30.0 degrees  
 Acq. time 3.525 sec  
 Width 3803.1 Hz  
 16 repetitions  
 OBSERVE H1, 300.2237117 MHz  
 DATA PROCESSING  
 FT size 45526  
 Total time 1 min, 18 sec

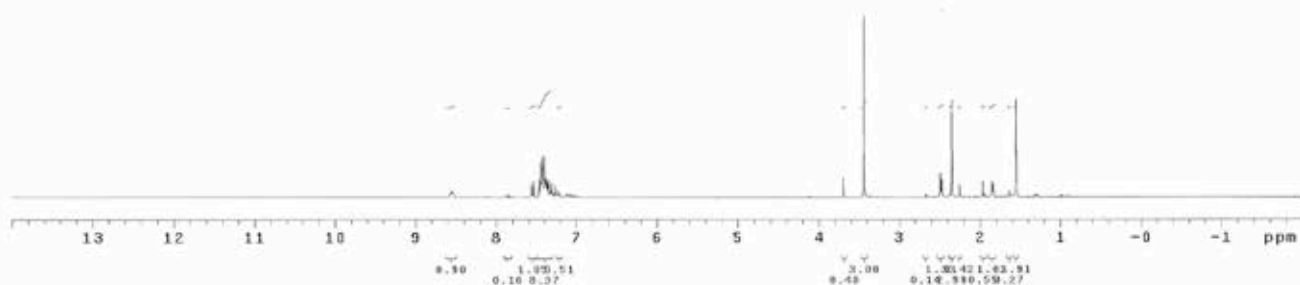

Std Carbon experiment  
 File: sp  
 Pulse Sequence: s2pul  
 Solvent: cdcl3  
 Temp: 22.0 C / 295.1 K  
 Operator: dpat11  
 Mercury-300 "r2d2"  
 Relax. delay 1.000 sec  
 Pulse 30.0 degrees  
 Acq. time 1.381 sec  
 Width 18115.3 Hz  
 256 repetitions  
 OBSERVE C13, 75.490054 MHz  
 DECOUPLE H1, 300.2195461 MHz  
 Power 40 dB  
 Continuously on  
 WALTZ-16 modulated  
 DATA PROCESSING  
 Line broadening 0.5 Hz  
 FT size 35536  
 Total time 10 min, 45 sec

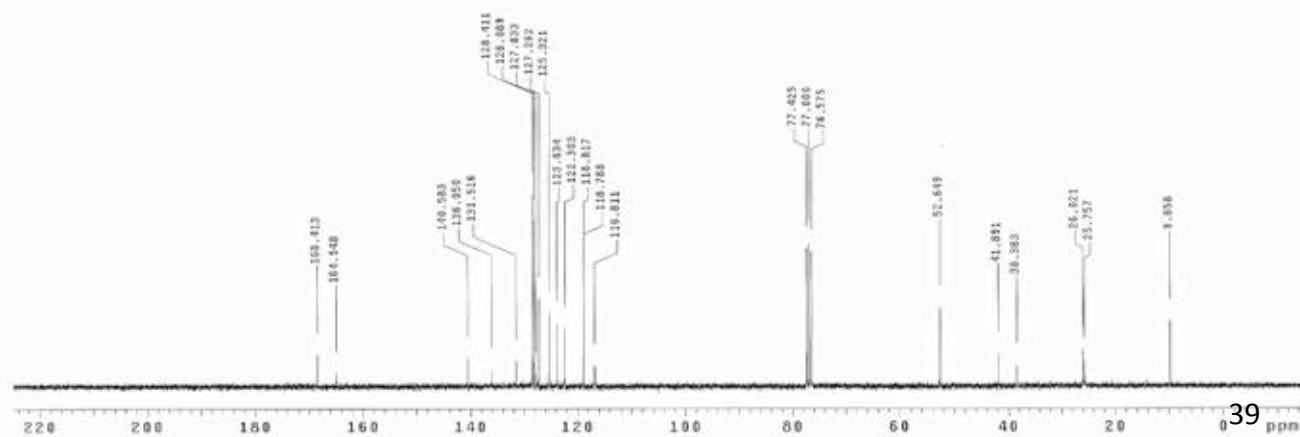

Rh exp CP 2-vinylindazole  
 Sample: NH-5-DVP-56-A  
 File: xp  
 Pulse Sequence: s2pul  
 Solvent: cdc13  
 Temp: 20.0 C / 283.1 K  
 Operator: dpat11  
 Mercury-300 "r2d2"  
 Relax. delay 1.000 sec  
 Pulse 30.0 degrees  
 Acq. time 0.558 sec  
 Width 4863.1 Hz  
 16 Reptitions  
 OBSERVE F1: 300.2227381 MHz  
 DATA PROCESSING  
 FT size 85536  
 Total time 1 min, 18 sec

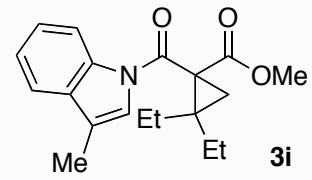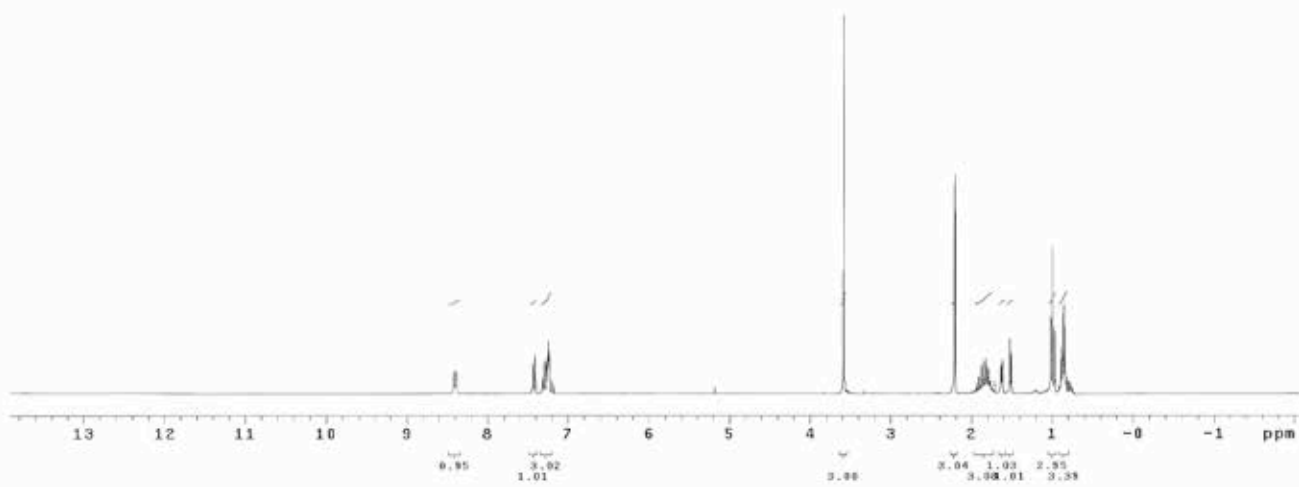

Std Carbon experiment  
 Sample: NH-5-DVP-56-A  
 File: xp  
 Pulse Sequence: s2pul  
 Solvent: cdc13  
 Temp: 20.0 C / 283.1 K  
 Operator: dpat11  
 Mercury-300 "r2d2"  
 Relax. delay 1.000 sec  
 Pulse 30.0 degrees  
 Acq. time 1.301 sec  
 Width 18117.9 Hz  
 80 Reptitions  
 OBSERVE F1: 75.4813213 MHz  
 DECOUPLE M1: 300.2251667 MHz  
 Power 10 dB  
 continuously on  
 WALTZ-16 modulated  
 DATA PROCESSING  
 Line broadening 0.5 Hz  
 FT size 65536  
 Total time 10 min, 45 sec

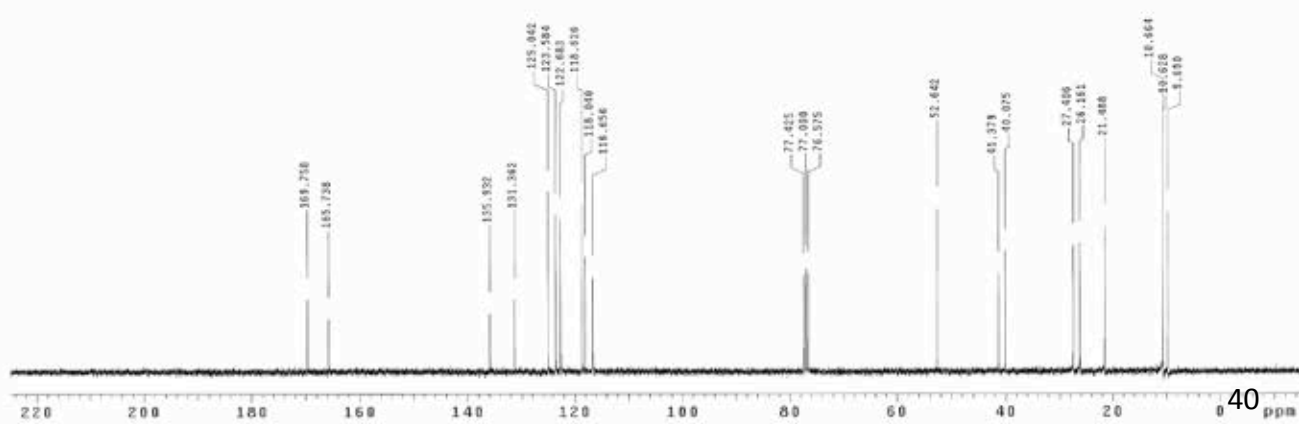



Std Proton parameters  
Sample: NS-5-DVP-48-B  
File: sp  
Pulse Sequence: szpul  
Solvent: cdcl3  
Temp: 20.0 C / 293.1 K  
Operator: dpat11  
Mercury-300 "r2d2"  
Relax. delay 1.000 sec  
Pulse 30.0 degrees  
Acq. time 3.559 sec  
Width 4800.1 Hz  
16 repetitions  
OBSERVE H1, 300.2297117 MHz  
DATA PROCESSING  
FT size 65536  
Total time 1 min, 18 sec

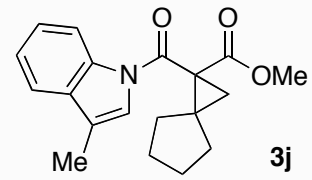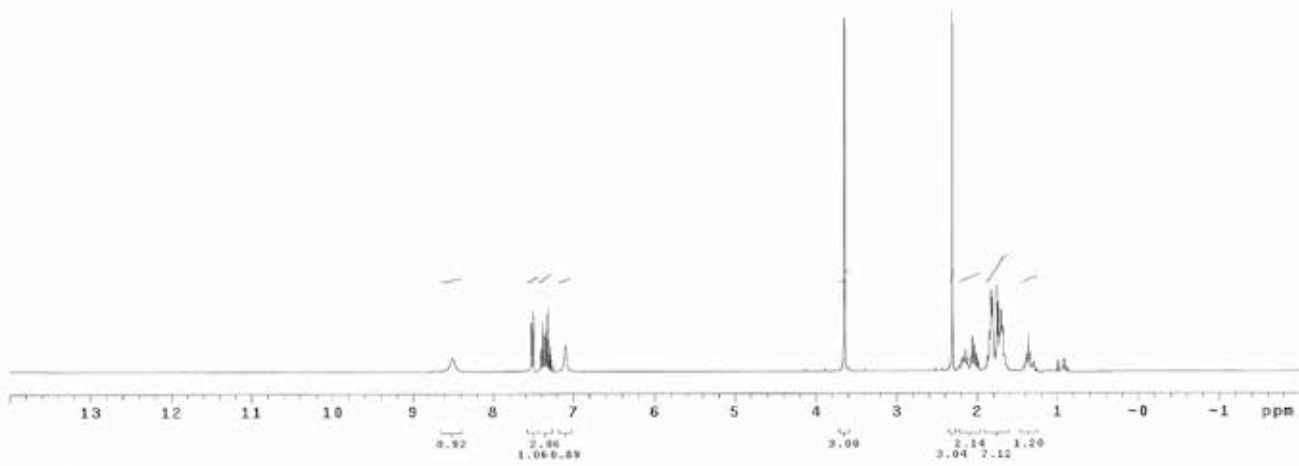

Std Carbon experiment  
Sample: NS-5-DVP-48-B  
File: sp  
Pulse Sequence: szpul  
Solvent: cdcl3  
Temp: 20.0 C / 293.1 K  
Operator: dpat11  
Mercury-300 "r2d2"  
Relax. delay 1.000 sec  
Pulse 30.0 degrees  
Acq. time 1.301 sec  
Width 18115.9 Hz  
312 repetitions  
OBSERVE C13, 75.4913335 MHz  
DECUPLE H1, 300.2251447 MHz  
Power 40 dB  
continuously on  
WALTZ-16 modulated  
DATA PROCESSING  
line broadening 0.5 Hz  
FT size 65536  
Total time 18 min, 45 sec

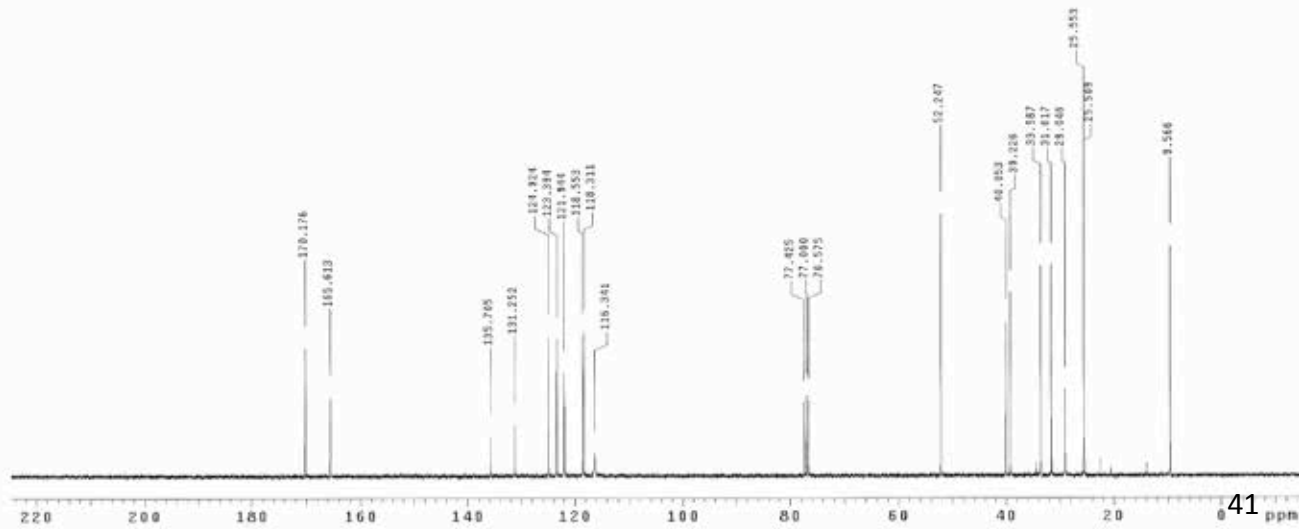

Std Proton parameters  
Sample: NB-5-DVP-51-B-H  
File: xp  
Pulse Sequence: s2pul  
Solvent: cdcl3  
Temp: 29.0 C / 293.1 K  
Operator: dpatt11  
Mercury-300 "r2d2"  
Relax. delay 1.000 sec  
Pulse 33.6 degrees  
Acq. time 3.559 sec  
Width 4893.1 Hz  
18 repetitions  
OBSERVE H1, 300.2237174 MHz  
DATA PROCESSING  
FT size 65536  
Total time 1 min, 18 sec

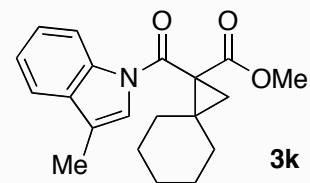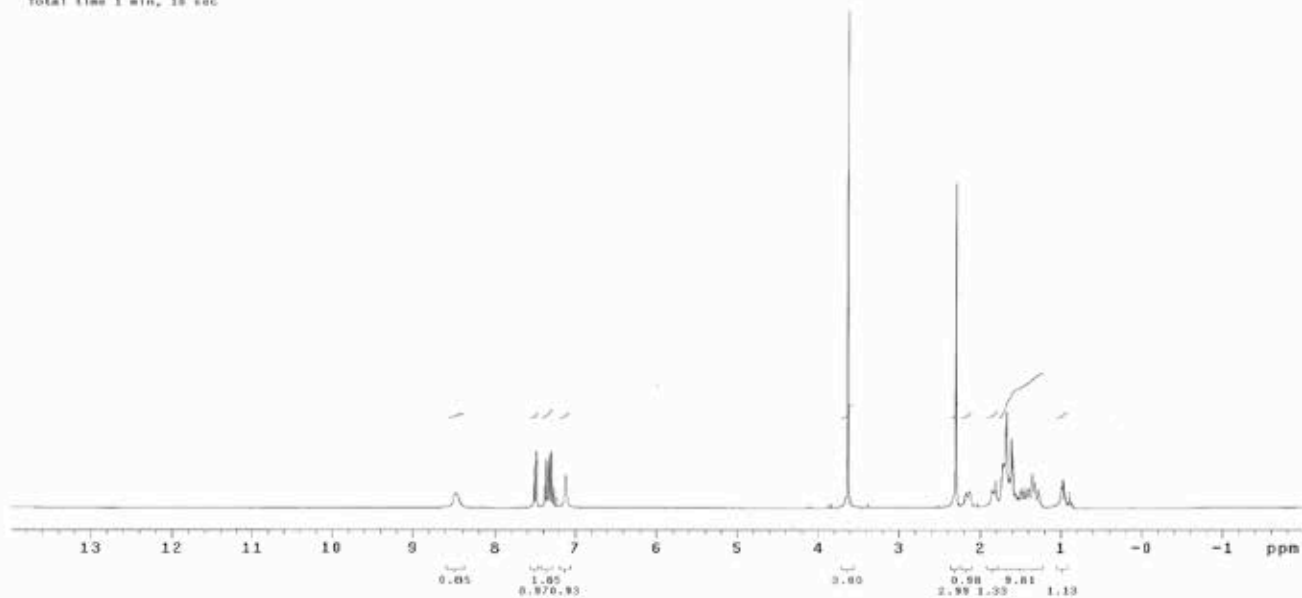

Std Carbon experiment  
Sample: NB-5-DVP-51-B-H  
File: xp  
Pulse Sequence: s2pul  
Solvent: cdcl3  
Temp: 29.0 C / 293.1 K  
Operator: dpatt11  
Mercury-300 "r2d2"  
Relax. delay 1.000 sec  
Pulse 33.0 degrees  
Acq. time 1.393 sec  
Width 16135.9 Hz  
308 repetitions  
OBSERVE C13, 75.4813242 MHz  
DECOUPLE H1, 300.2251667 MHz  
Power 49 dB  
continuously on  
WALTZ-16 modulated  
DATA PROCESSING  
Line broadening 0.3 Hz  
FT size 65536  
Total time 10 min, 45 sec

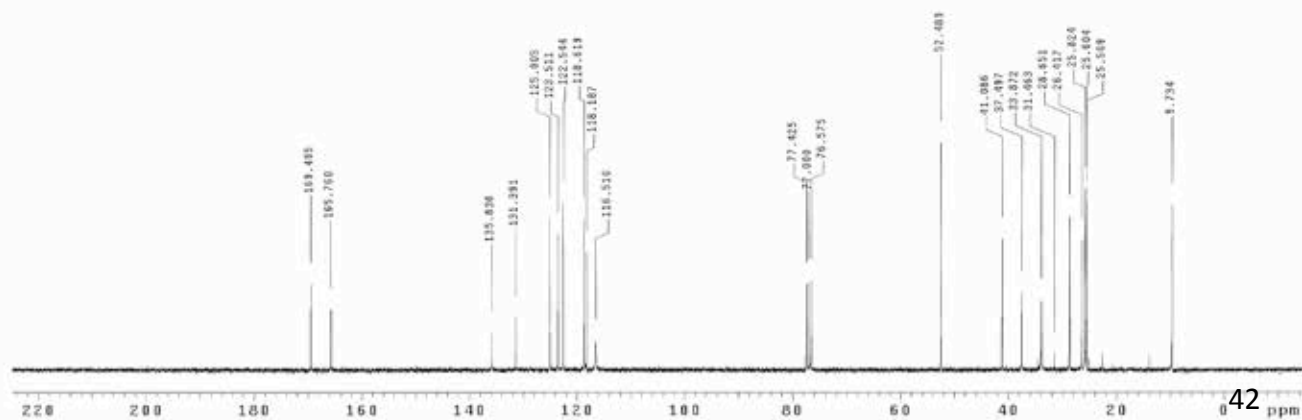

Std Proton parameters  
Sample: NB-4-DVP-174-H  
File: xp  
Pulse Sequence: s2pul  
Solvent: cdcl3  
Ambient temperature  
Operator: dpaf11  
Mercury-300 "r2d2"  
Relax. delay 1.000 sec  
Pulse 30.0 degrees  
Acq. time 3.559 sec  
Width 4003.1 Hz  
18 repetitions  
OBSERVE F1, 300.2237684 MHz  
DATA PROCESSING  
FT size 65536  
Total time 1 min, 16 sec

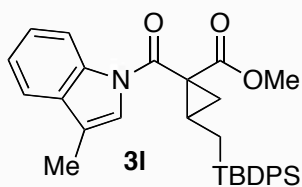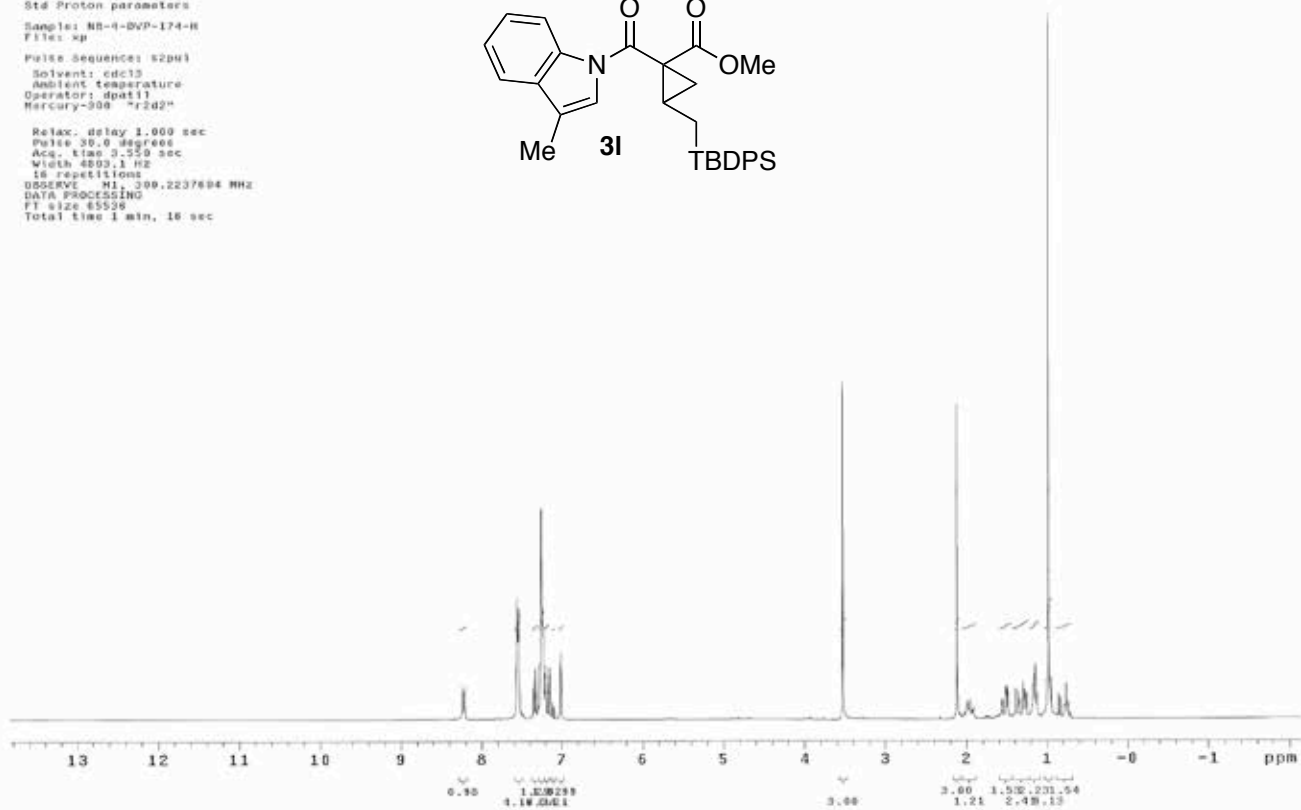

Std Carbon experiment  
Sample: NB-4-DVP-174-H  
File: xp  
Pulse Sequence: s2pul  
Solvent: cdcl3  
Ambient temperature  
Operator: dpaf11  
Mercury-300 "r2d2"  
Relax. delay 1.000 sec  
Pulse 30.0 degrees  
Acq. time 1.381 sec  
Width 3811.9 Hz  
182 repetitions  
OBSERVE G13, 75.4813137 MHz  
DECUPLE H1, 399.2251657 MHz  
Power 40 dB  
continuously on  
WALTZ-16 modulated  
DATA PROCESSING  
Line broadening 0.5 Hz  
FT size 65536  
Total time 10 min, 45 sec

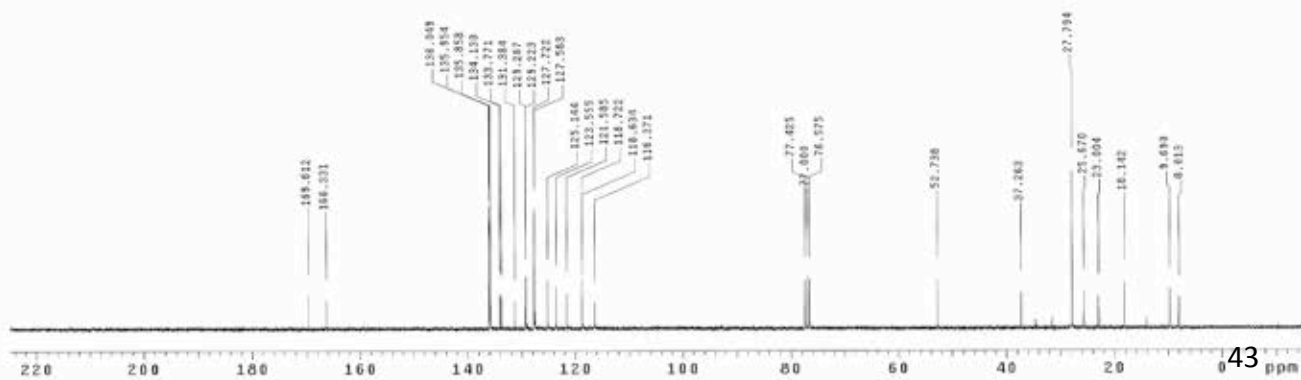

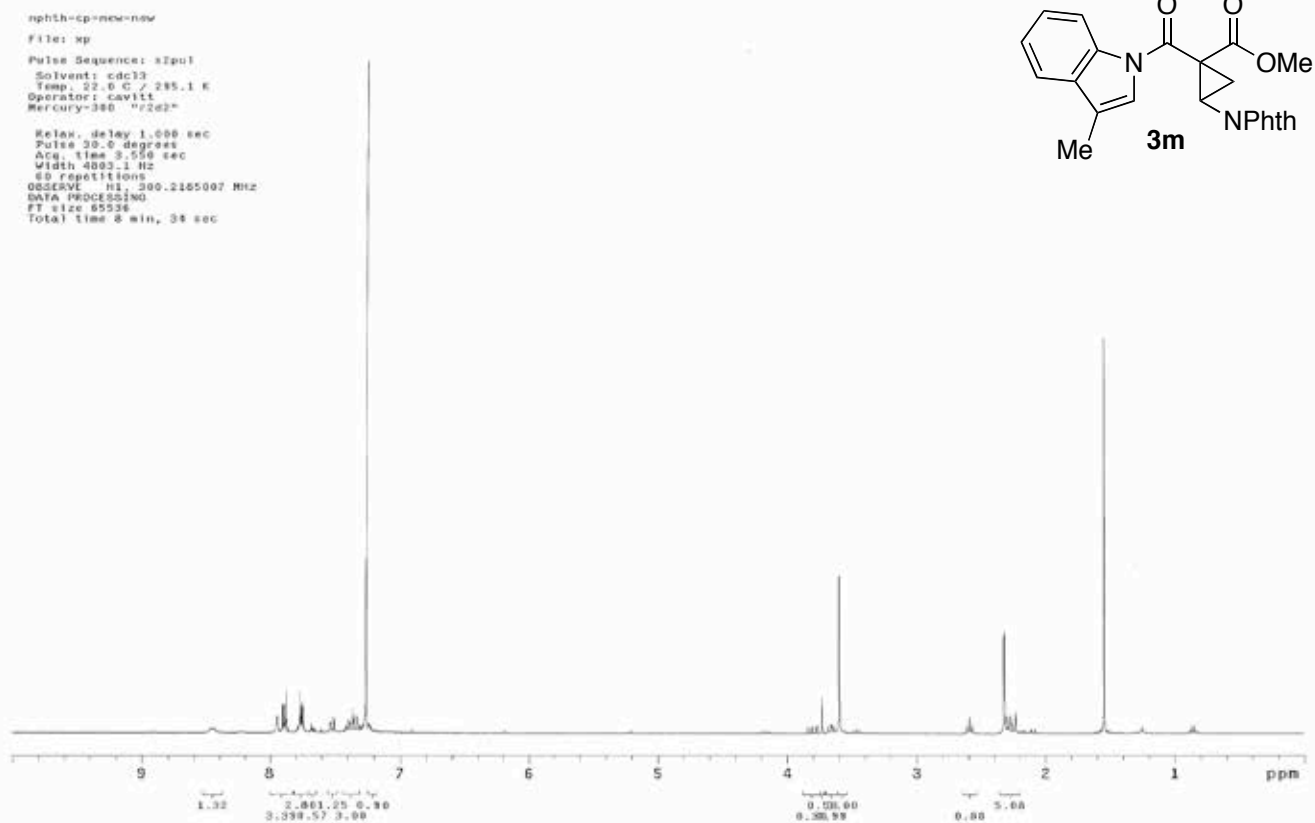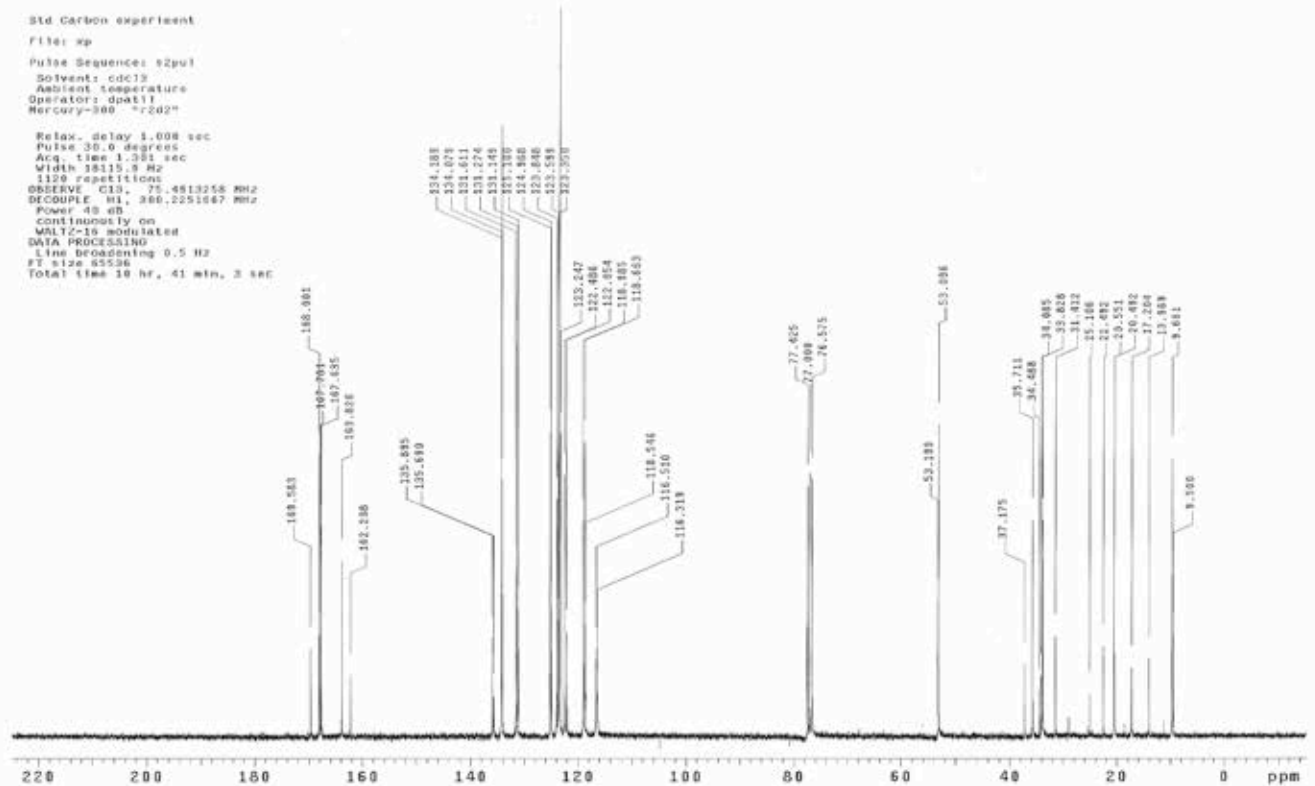

II-MAC-53-H  
 File: xp  
 Pulse Sequence: s2pul  
 Solvent: cdcl3  
 Ambient temperature  
 Operator: cavitt  
 Mercury-300 "r2d2"  
 Relax. delay 1.000 sec  
 Pulse 30.0 degrees  
 Acq. time 3.550 sec  
 Width 4893.1 Hz  
 66 repetitions  
 OBSERVE H1, 300.2164999 MHz  
 DATA PROCESSING  
 FT size 65536  
 Total time 8 min, 34 sec

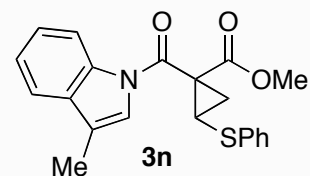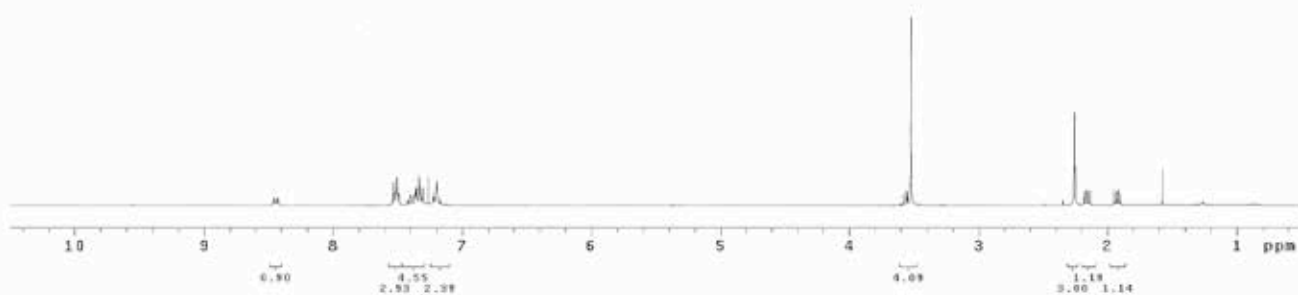

II-MAC-53-C  
 File: xp  
 Pulse Sequence: s2pul  
 Solvent: cdcl3  
 Ambient temperature  
 Operator: cavitt  
 Mercury-300 "r2d2"  
 Relax. delay 1.000 sec  
 Pulse 30.0 degrees  
 Acq. time 1.381 sec  
 Width 18115.3 Hz  
 136 repetitions  
 OBSERVE C13, 75.4900041 MHz  
 DECOUPLE H1, 300.2164999 MHz  
 Power 40 dB  
 Continuously on  
 WALTZ-16 modulated  
 DATA PROCESSING  
 Line broadening 0.5 Hz  
 FT size 45536  
 Total time 25 hr, 48 min, 5 sec

| INDEX | FREQUENCY | PPM     | HEIGHT |
|-------|-----------|---------|--------|
| 1     | 12625.7   | 167.251 | 7.6    |
| 2     | 12421.7   | 164.546 | 7.0    |
| 3     | 10269.6   | 135.929 | 5.9    |
| 4     | 10221.6   | 135.408 | 6.9    |
| 5     | 8839.0    | 131.541 | 7.2    |
| 6     | 8738.2    | 128.009 | 41.2   |
| 7     | 8691.2    | 127.623 | 38.6   |
| 8     | 8511.5    | 125.997 | 28.7   |
| 9     | 8471.7    | 125.479 | 17.7   |
| 10    | 8362.0    | 124.027 | 16.7   |
| 11    | 8137.8    | 121.046 | 13.6   |
| 12    | 8036.6    | 118.708 | 10.8   |
| 13    | 8979.7    | 118.952 | 15.6   |
| 14    | 8780.3    | 116.550 | 9.6    |
| 15    | 5844.4    | 77.420  | 53.1   |
| 16    | 5812.9    | 77.002  | 55.1   |
| 17    | 5780.8    | 76.578  | 56.7   |
| 18    | 4007.3    | 53.084  | 18.6   |
| 19    | 2989.4    | 39.733  | 8.8    |
| 20    | 2126.1    | 28.191  | 11.7   |
| 21    | 1507.0    | 19.974  | 14.0   |
| 22    | 794.4     | 9.758   | 12.1   |

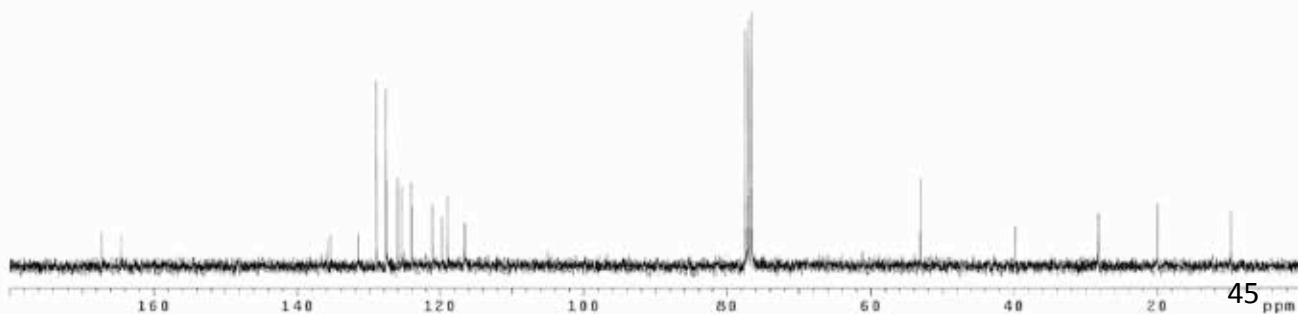

DHF-H-T1  
File: home/franco/cavitt/DHF-H-T1.fid  
Pulse Sequence: s2pul  
Solvent: cdcl3  
Ambient Temperature  
Operator: cavitt  
File: DHF-H-T1  
Mercury-300 "r1d2"  
Relax. delay 1.000 sec  
Pulse 30.0 degrees  
Acq. time 3.350 sec  
Width 4883.1 Hz  
33 repetitions  
OBSERVE H1, 300.2185882 MHz  
DATA PROCESSING  
F1 size 65536  
Total time 8 min, 34 sec

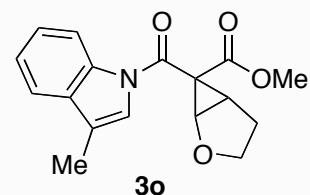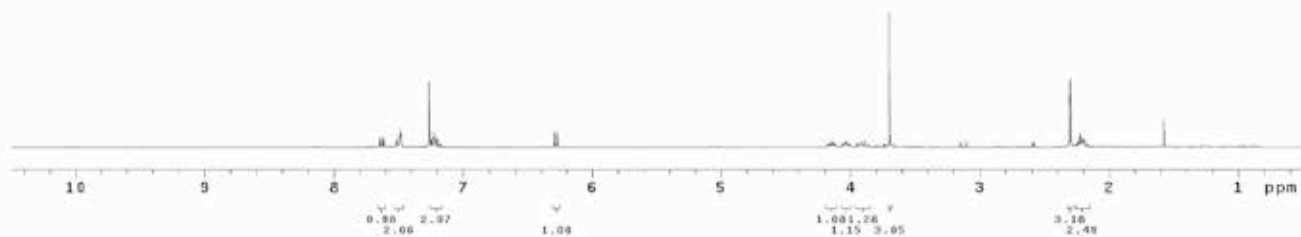

Std Carbon experiment  
Sample: NB-4-DVP-186-H  
File: xp  
Pulse Sequence: s2pul  
Solvent: cdcl3  
Ambient Temperature  
Operator: spattl  
Mercury-300 "r2d2"  
Relax. delay 1.008 sec  
Pulse 30.0 degrees  
Acq. time 1.301 sec  
Width 18111.3 Hz  
268 repetitions  
OBSERVE C13, 75.4013288 MHz  
DECOUPLE H1, 300.2251067 MHz  
Power 46 dB  
continuously on  
MULTI-z is modulated  
DATA PROCESSING  
Line broadening 0.5 Hz  
F1 size 45536  
Total time 10 min, 45 sec

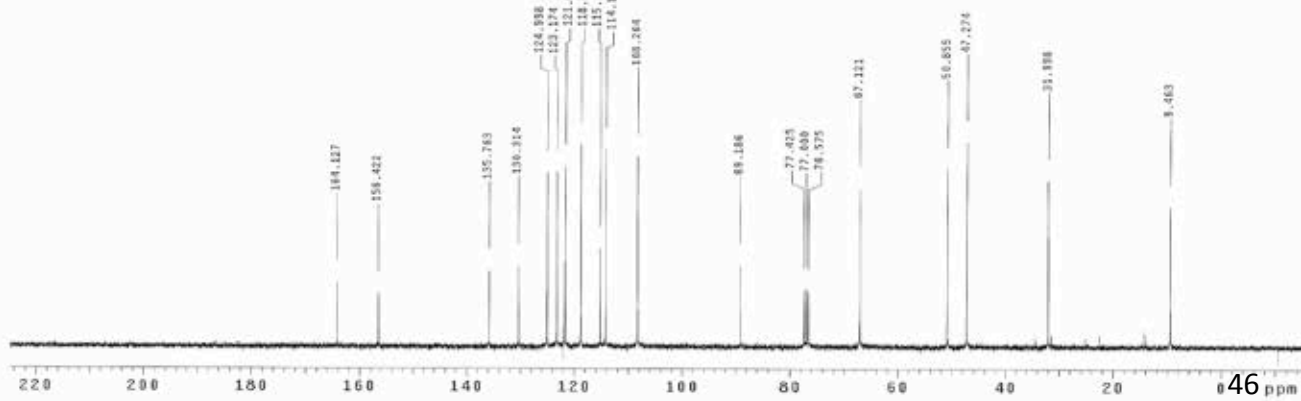

DHP-cp  
File: xp  
Pulse Sequence: s2pul  
Solvent: cdcl3  
Ambient temperature  
Operator: cavilli  
Mercury-300 "r2d2"  
Relax. delay 1.000 sec  
Pulse 33.0 degrees  
Acq. time 3.550 sec  
Width 4883.1 Hz  
33 repetitions  
OBSERVE H1, 300.2185023 MHz  
DATA PROCESSING  
F1 size 65536  
Total time 8 min, 34 sec

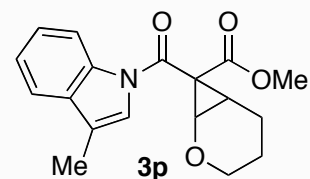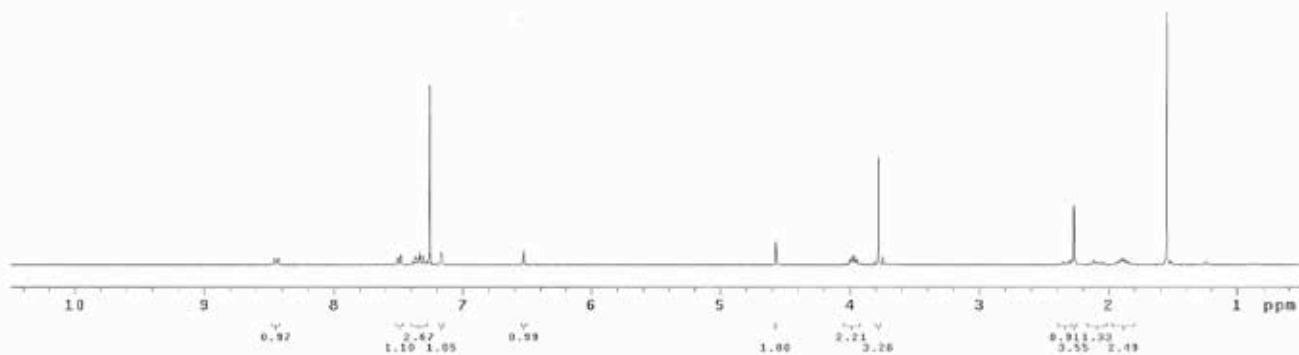

Std Carbon experiment  
Sample: NS-4-DVP-161-H  
File: xp  
Pulse Sequence: s2pul  
Solvent: cdcl3  
Ambient temperature  
Operator: dpatil  
Mercury-300 "r2d2"  
Relax. delay 1.000 sec  
Pulse 33.0 degrees  
Acq. time 1.293 sec  
Width 18135.0 Hz  
102 repetitions  
OBSERVE C13, 75.4913242 MHz  
DECUPLE H1, 300.2251662 MHz  
Power 40 dB  
continuously on  
WALTZ-16 modulated  
DATA PROCESSING  
Line broadening 0.5 Hz  
F1 size 65536  
Total time 18 hr, 41 min, 3 sec

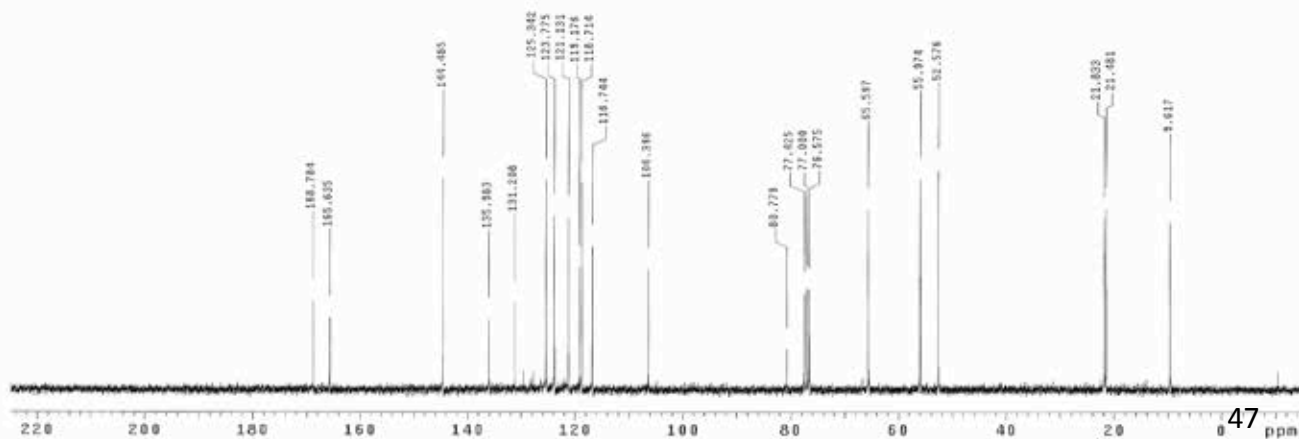

Std Proton parameters  
Sample: 3-methylindole-Cbz-CP-N  
File: xp  
Pulse Sequence: zgpg30  
Solvent: cdcl3  
Ambient temperature  
Operator: dpatt11  
Mercury-300 "r2d2"  
Relax. delay 1.000 sec  
Pulse 30.0 degrees  
Acq. time 3.250 sec  
Width 4803.1 Hz  
25 repetitions  
OBSERVE HI, 300.2185002 MHz  
DATA PROCESSING  
FT size 65536  
Total time 1 min, 16 sec

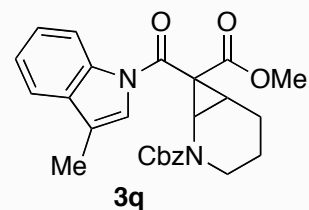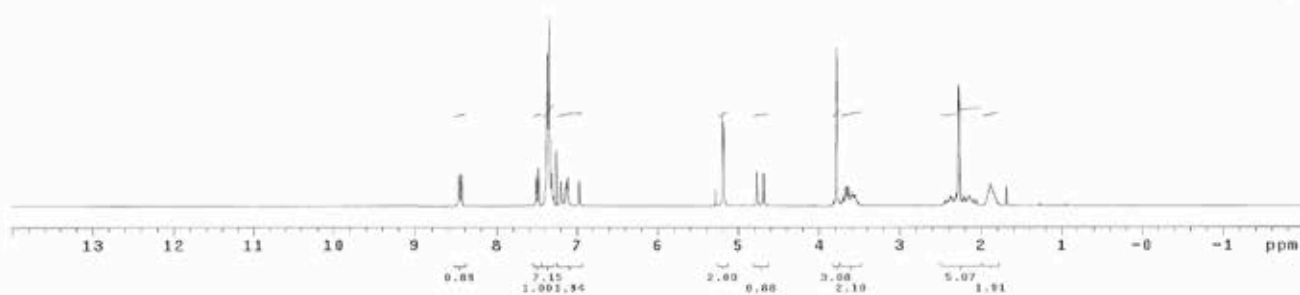

Std Carbon experiment  
Sample: 3-methylindole-Cbz-CP-N  
File: xp  
Pulse Sequence: zgpg30  
Solvent: cdcl3  
Ambient temperature  
Operator: dpatt11  
Mercury-300 "r2d2"  
Relax. delay 1.000 sec  
Pulse 30.0 degrees  
Acq. time 3.301 sec  
Width 18135.9 Hz  
258 repetitions  
OBSERVE C13, 75.4980071 MHz  
DECOUPLE HI, 300.2185002 MHz  
Power 40 dB  
CONTINUOUSLY ON  
WALTZ-16 modulated  
DATA PROCESSING  
Line broadening 0.5 Hz  
FT size 65536  
Total time 18 min, 45 sec

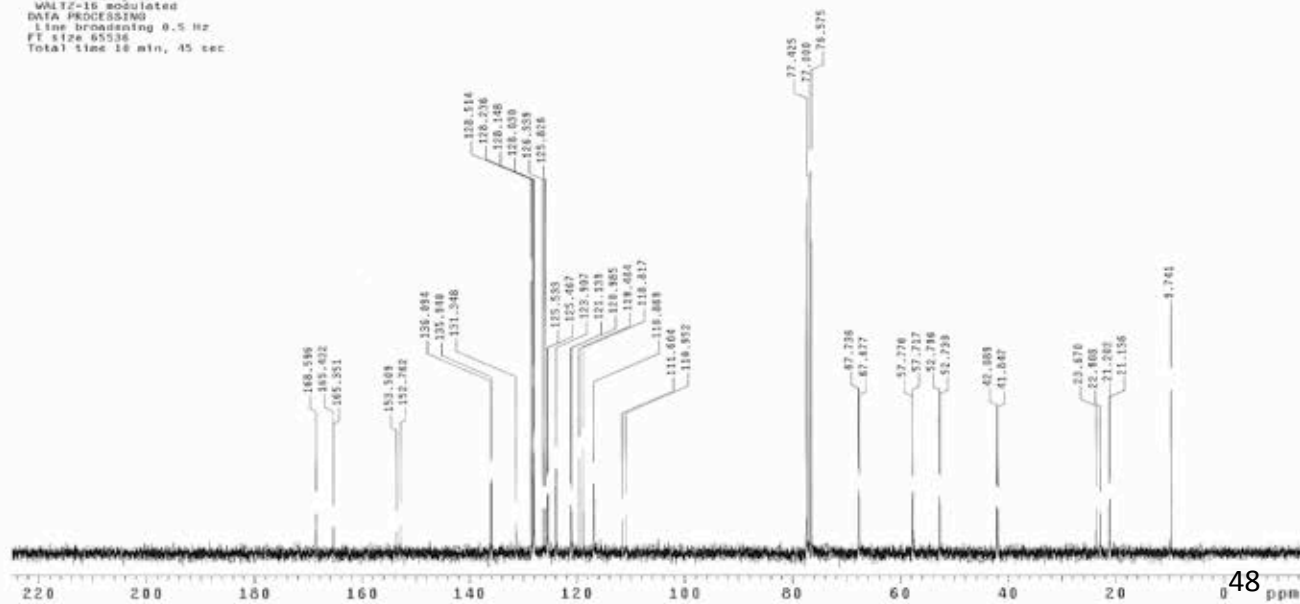



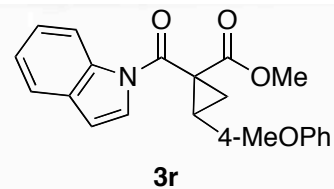

2,3-*non*substituted indole CP  
Sample: NB-5-DVP-90-H  
File: 90  
Pulse Sequence: g2ppl  
Solvent: cdcl3  
Ambient temperature  
Operator: dpatt1  
Mercury-300 "r2d2"  
Relax. delay 1.000 sec  
Pulse 30.0 udegrees  
Acq. time 3.550 sec  
Width 5893.1 Hz  
16 repetitions  
OBSERVE F1: 300.2165182 MHz  
DATA PROCESSING  
FT size 65536  
Total time 1 min, 16 sec

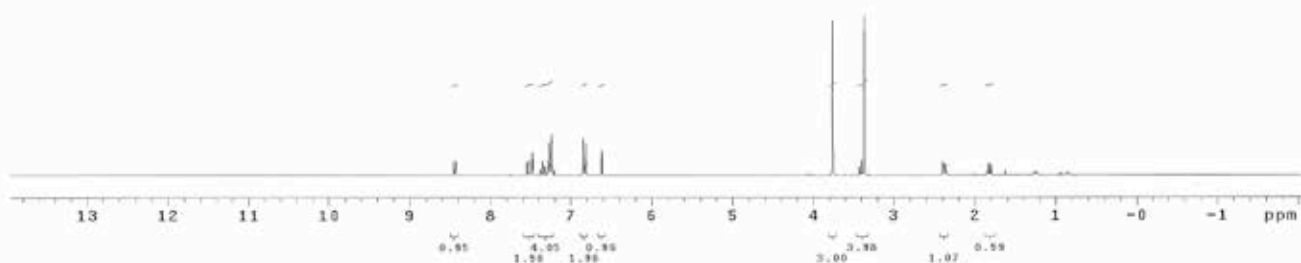

Std Carbon experiment  
Sample: NB-5-DVP-90-H  
File: 90  
Pulse Sequence: g2ppl  
Solvent: cdcl3  
Ambient temperature  
Operator: dpatt1  
Mercury-300 "r2d2"  
Relax. delay 1.000 sec  
Pulse 38.0 degrees  
Acq. time 1.301 sec  
Width 10115.3 Hz  
112 repetitions  
OBSERVE G13: 75.4508882 MHz  
DECOUPLE H1: 300.2199481 MHz  
Power 49 dB  
continuously on  
WALTZ-16 modulated  
DATA PROCESSING  
Line broadening 0.5 Hz  
FT size 65536  
Total time 19 min, 45 sec

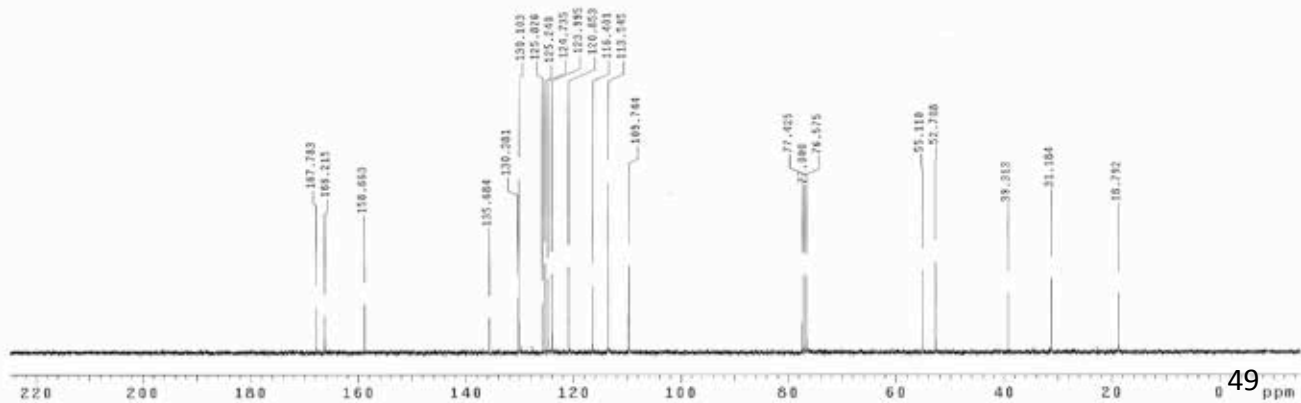

Std Proton parameters  
Sample: EtBrindole-CP-N  
File: xp  
Pulse Sequence: s2pu1  
Solvent: cdk13  
Ambient temperature  
Operator: dpatl1  
Mercury-300 "r2d2"  
Relax. delay 1.000 sec  
Pulse 38.0 degrees  
Acq. time 3.550 sec  
Width 4063.1 Hz  
16 repetitions  
OBSERVE M1, 300.2185171 MHz  
DATA PROCESSING  
F1 size 05538  
Total time 1 min, 16 sec

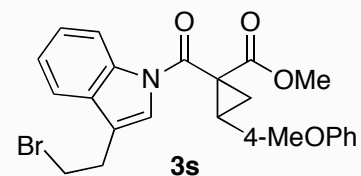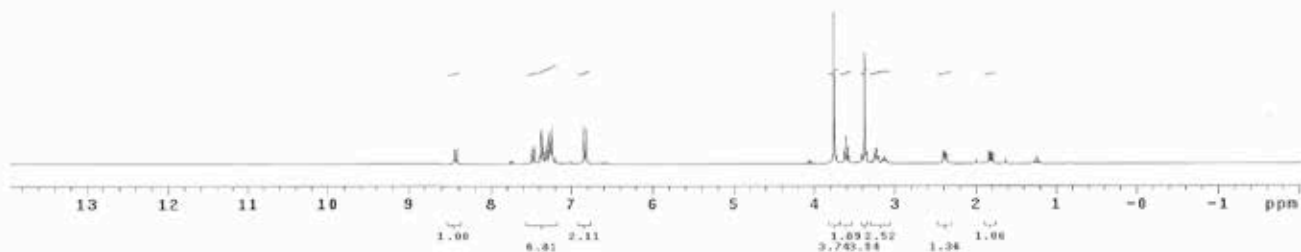

Std Carbon experiment  
Sample: EtBrindole-CP-N  
File: howe/france/dpatl1/4-OMe-EtBrindole-CP-C.fid  
Pulse Sequence: s2pu1  
Solvent: cdk13  
Ambient temperature  
Operator: dpatl1  
File: 4-OMe-EtBrindole-CP-C  
Mercury-300 "r2d2"  
Relax. delay 1.000 sec  
Pulse 38.0 degrees  
Acq. time 1.301 sec  
Width 10315.9 Hz  
80 repetitions  
OBSERVE C13, 75.4900019 MHz  
DECOUPLE M1, 300.2199401 MHz  
Power 40 dB  
continuously on  
WALTZ-16 modulated  
DATA PROCESSING  
Line broadening 0.5 Hz  
F1 size 05538  
Total time 10 min, 40 sec

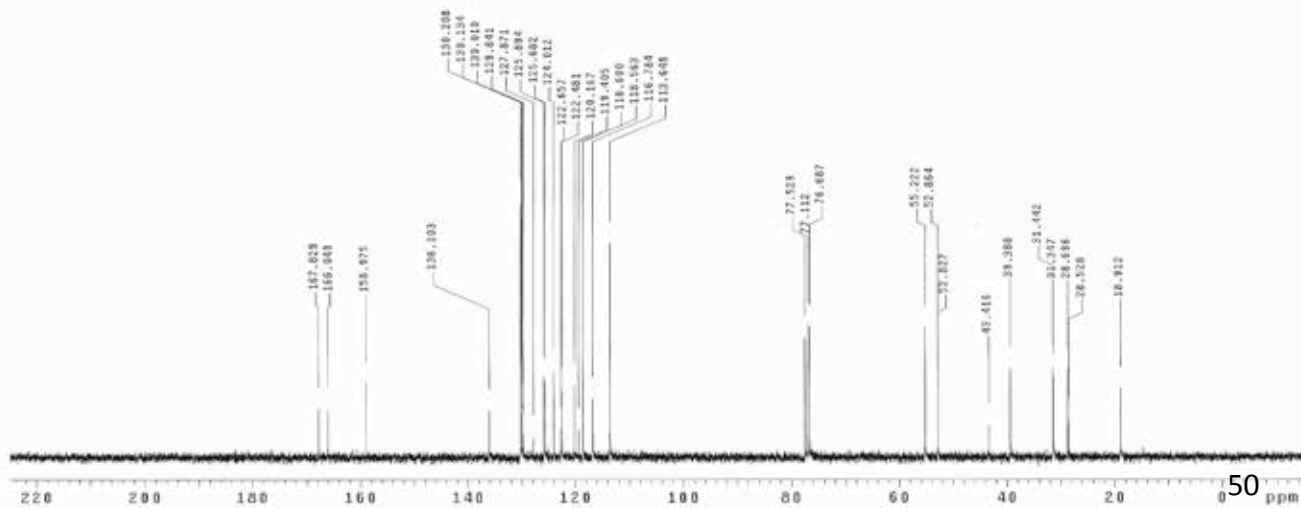

II-MAG-55-H  
 File: xp  
 Pulse Sequence: s2pul  
 Solvent: cdcl3  
 Ambient temperature  
 Operator: cavitt  
 Mercury-300 "r2d2"  
 Relax. delay 1.000 sec  
 Pulse 30.0 degrees  
 Acq. time 3.550 sec  
 Width 4803.1 Hz  
 40 repetitions  
 OBSERVE H1 300.218487 MHz  
 DATA PROCESSING  
 FT size 65536  
 Total time 8 min, 34 sec

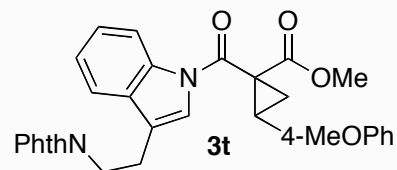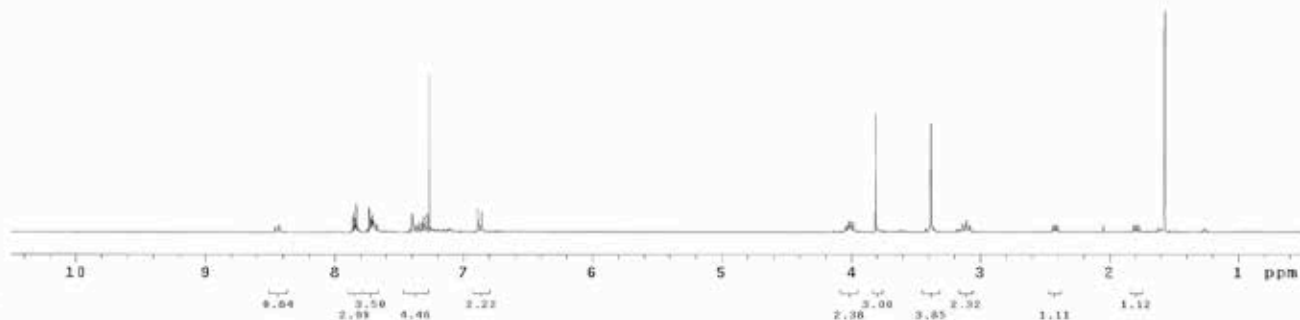

File: home/franca/cavitt/I\_mac\_203\_carbon.fid  
 Pulse Sequence: s2pul  
 Solvent: cdcl3  
 Ambient temperature  
 Operator: cavitt  
 File: I\_mac\_203\_carbon  
 Mercury-300 "r2d2"  
 Relax. delay 1.000 sec  
 Pulse 30.0 degrees  
 Acq. time 1.301 sec  
 Width 18217.8 Hz  
 28789 repetitions  
 OBSERVE C13 75.4913117 MHz  
 DECOUPLE H1 300.2251887 MHz  
 Power 50 dB  
 continuously on  
 WALTZ-16 modulated  
 DATA PROCESSING  
 Line broadening 8.5 Hz  
 FT size 65536  
 Total time 85 hr, 48 min, 5 sec

| INDEX | FREQUENCY | PPH     | HEIGHT |
|-------|-----------|---------|--------|
| 1     | 12695.6   | 168.173 | 15.3   |
| 2     | 12662.4   | 167.734 | 19.3   |
| 3     | 12535.1   | 166.920 | 9.3    |
| 4     | 11946.2   | 156.988 | 18.6   |
| 5     | 10273.0   | 136.062 | 8.3    |
| 6     | 10116.8   | 134.038 | 39.3   |
| 7     | 10185.5   | 133.863 | 8.1    |
| 8     | 9367.8    | 122.939 | 17.8   |
| 9     | 9845.1    | 130.414 | 11.8   |
| 10    | 8827.4    | 116.178 | 42.7   |
| 11    | 9513.9    | 124.050 | 12.6   |
| 12    | 8483.5    | 125.024 | 18.8   |
| 13    | 8384.7    | 124.050 | 17.9   |
| 14    | 9309.4    | 123.217 | 46.5   |
| 15    | 9288.9    | 123.178 | 9.3    |
| 16    | 8228.9    | 122.145 | 4.3    |
| 17    | 8212.6    | 122.030 | 16.3   |
| 18    | 8031.3    | 118.634 | 19.2   |
| 19    | 9023.8    | 119.524 | 4.3    |
| 20    | 8962.6    | 118.969 | 17.3   |
| 21    | 8974.9    | 118.867 | 3.8    |
| 22    | 8806.3    | 116.653 | 11.8   |
| 23    | 8577.4    | 113.621 | 39.6   |
| 24    | 8490.6    | 112.471 | 2.4    |
| 25    | 8385.8    | 111.060 | 4.9    |
| 26    | 5885.7    | 77.436  | 387.2  |
| 27    | 5829.2    | 77.216  | 14.2   |
| 28    | 5814.2    | 77.019  | 372.3  |
| 29    | 5782.2    | 76.594  | 376.5  |
| 30    | 5742.4    | 76.066  | 1.3    |
| 31    | 4168.4    | 55.217  | 25.2   |
| 32    | 4034.8    | 53.437  | 27.5   |
| 33    | 3981.8    | 53.734  | 14.4   |
| 34    | 2871.4    | 38.061  | 18.3   |
| 35    | 2906.2    | 38.497  | 4.2    |
| 36    | 2827.2    | 37.450  | 18.8   |
| 37    | 2362.8    | 31.298  | 15.8   |
| 38    | 1846.9    | 24.466  | 3.8    |
| 39    | 1832.8    | 24.268  | 16.1   |

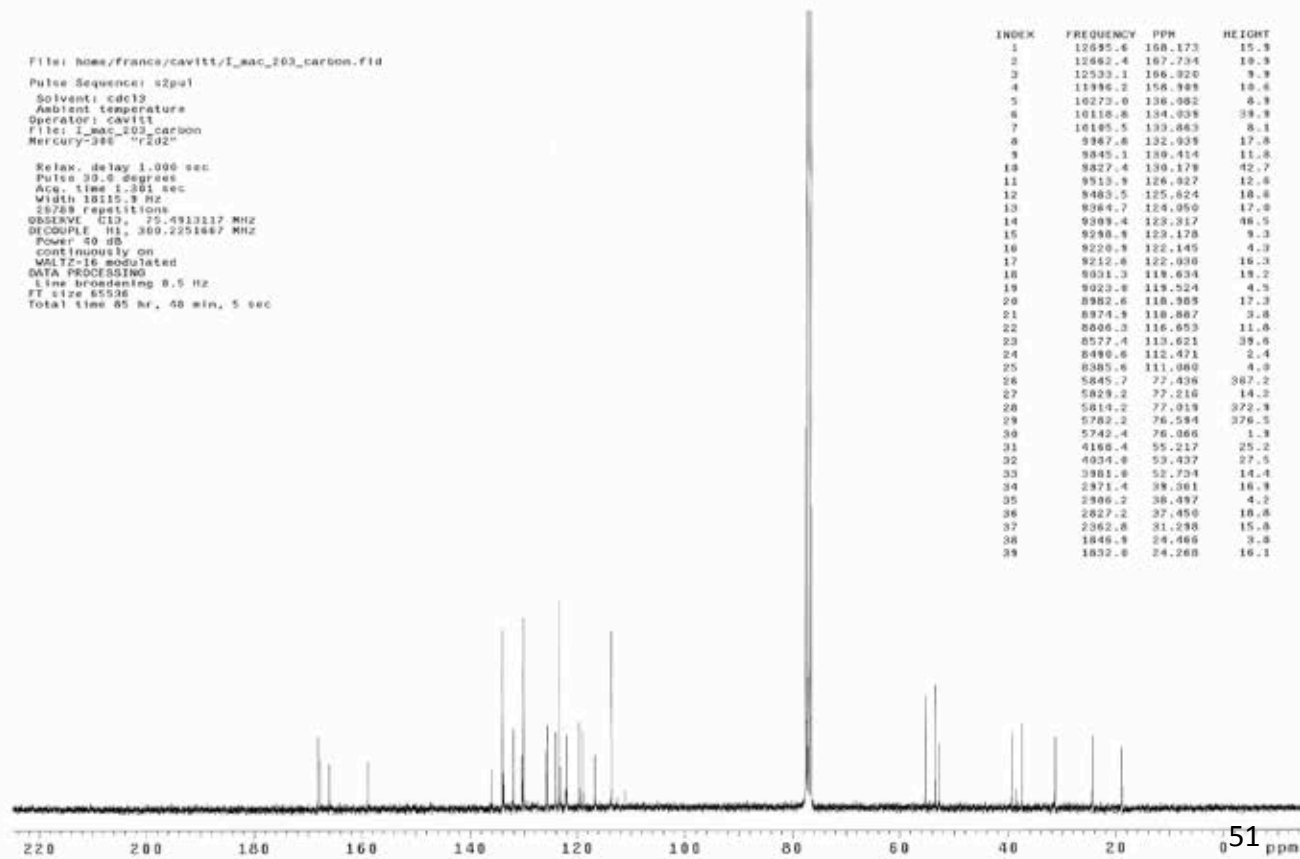



Std Proton parameters

Sample: alpha-bromostyrene-diazot\_spot  
File: hoes/franco/dpat11/alpha-bromo-styrene-CP-H.fid  
Pulse Sequence: szpul  
Solvent: cdc13  
Acquisition temperature  
Operator: dpat11  
File: alpha-bromo-styrene-CP-H  
Mercury-300 "r2d2"  
Relax. delay 1.000 sec  
Pulse 30.0 degree  
Acq. time 3.559 sec  
Width 4803.1 Hz  
16 repetitions  
OBSERVE H1, 300.2237183 MHz  
DATA PROCESSING  
FT size 65536  
Total time 1 min, 16 sec

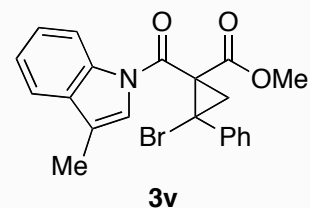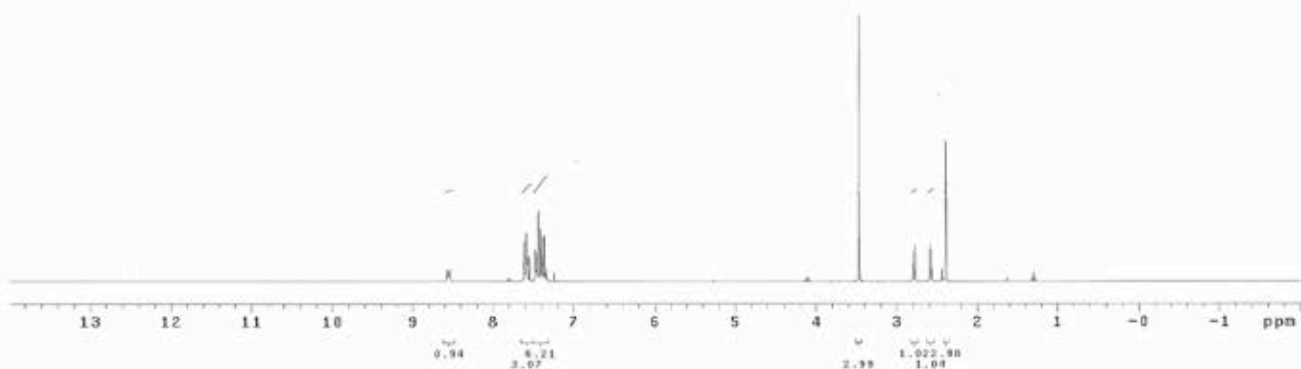

Std Carbon experiment

Sample: alpha-bromostyrene-diazot\_spot  
File: hoes/franco/dpat11/alpha-bromo-styrene-CP-C.fid  
Pulse Sequence: szpul  
Solvent: cdc13  
Acquisition temperature  
Operator: dpat11  
File: alpha-bromo-styrene-CP-C  
Mercury-300 "r2d2"  
Relax. delay 1.000 sec  
Pulse 30.0 degree  
Acq. time 1.391 sec  
Width 18115.9 Hz  
64 repetitions  
OBSERVE C13, 75.4913208 MHz  
DECOUPLE H1, 300.2251667 MHz  
Power 49 dB  
continuously on  
WALTZ-16 modulated  
DATA PROCESSING  
Line broadening 8.5 Hz  
FT size 85536  
Total time 16 min, 45 sec

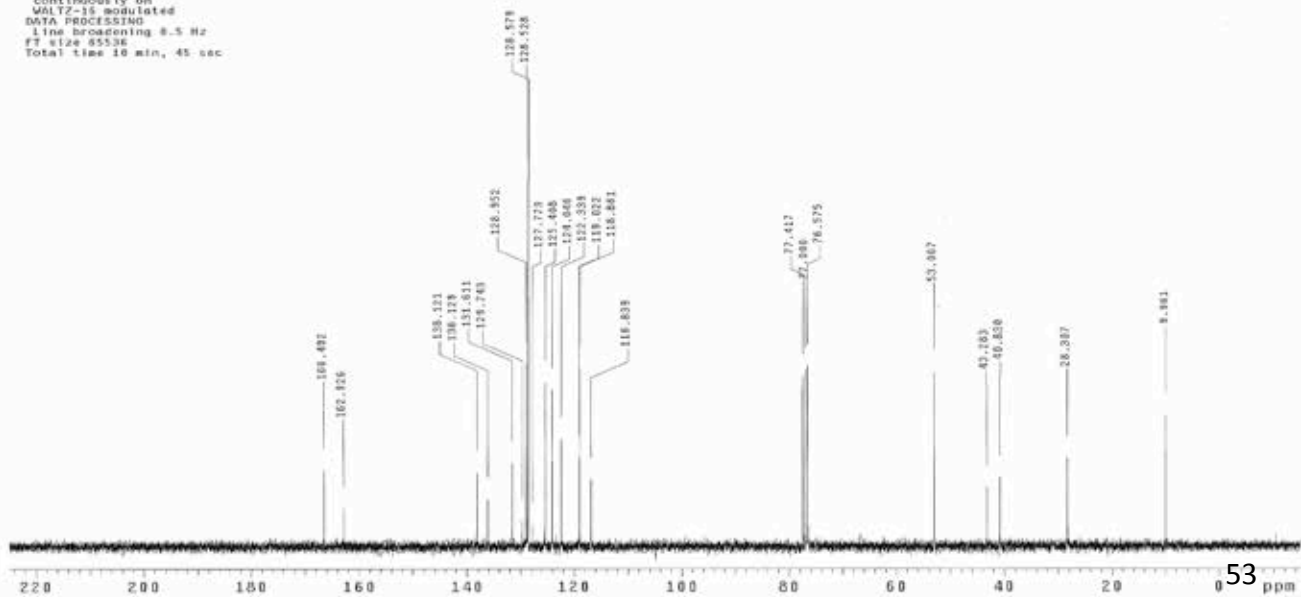

Std Proton parameters  
Sample: 4-Mestylene-cyln-B  
File: xp  
Pulse Sequence: szpul  
Solvent: cdcl3  
Temp: 22.0 C / 295.1 K  
Operator: dpatt1  
Mercury-300 "r202"  
  
Relax. delay 1.000 sec  
Pulse 30.0 degrees  
Acq. time 3.558 sec  
Width 4995.1 Hz  
16 repetitions  
OBSERVE HI: 300.2185052 MHz  
DATA PROCESSING  
FT size 65536  
Total time 1 min, 16 sec

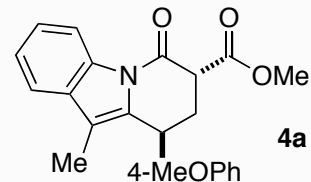

(2.6:1 trans:cis  
mixture of diastereomers)

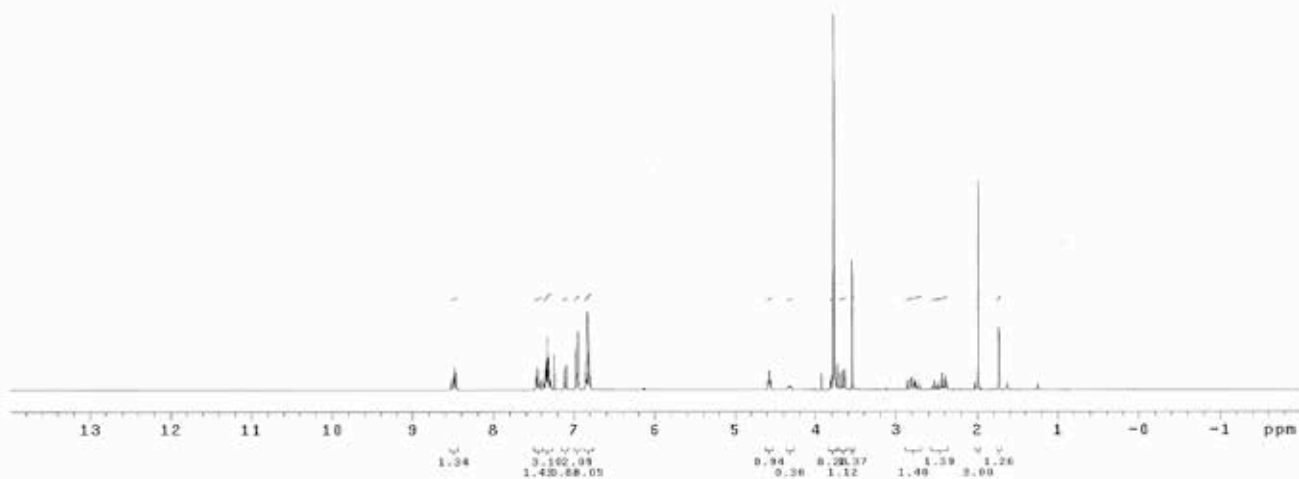

Std Carbon experiment  
Sample: 4-Mestylene-cyln-C  
File: xp  
Pulse Sequence: szpul  
Solvent: cdcl3  
Temp: 22.8 C / 295.1 K  
Operator: dpatt1  
Mercury-300 "r202"  
  
Relax. delay 1.000 sec  
Pulse 30.0 degrees  
Acq. time 1.301 sec  
Width 16115.3 Hz  
280 repetitions  
OBSERVE C13: 75.4808654 MHz  
DECOUPLE HI: 300.2189481 MHz  
Power 40 dB  
continuously on  
WALTZ-16 modulated  
DATA PROCESSING  
1 line broadcasting 0.5 Hz  
FT size 65536  
Total time 42 min, 2 sec

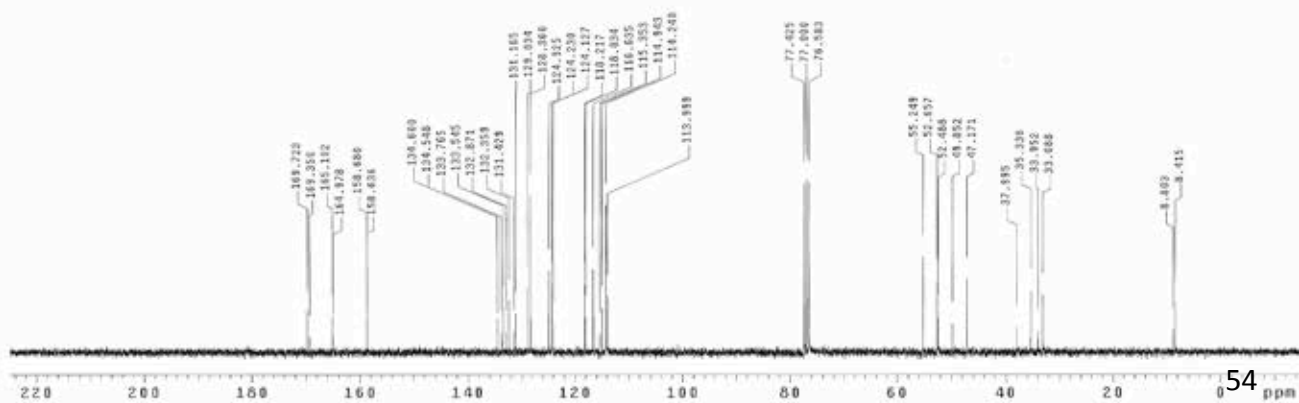

O-ME cyclized

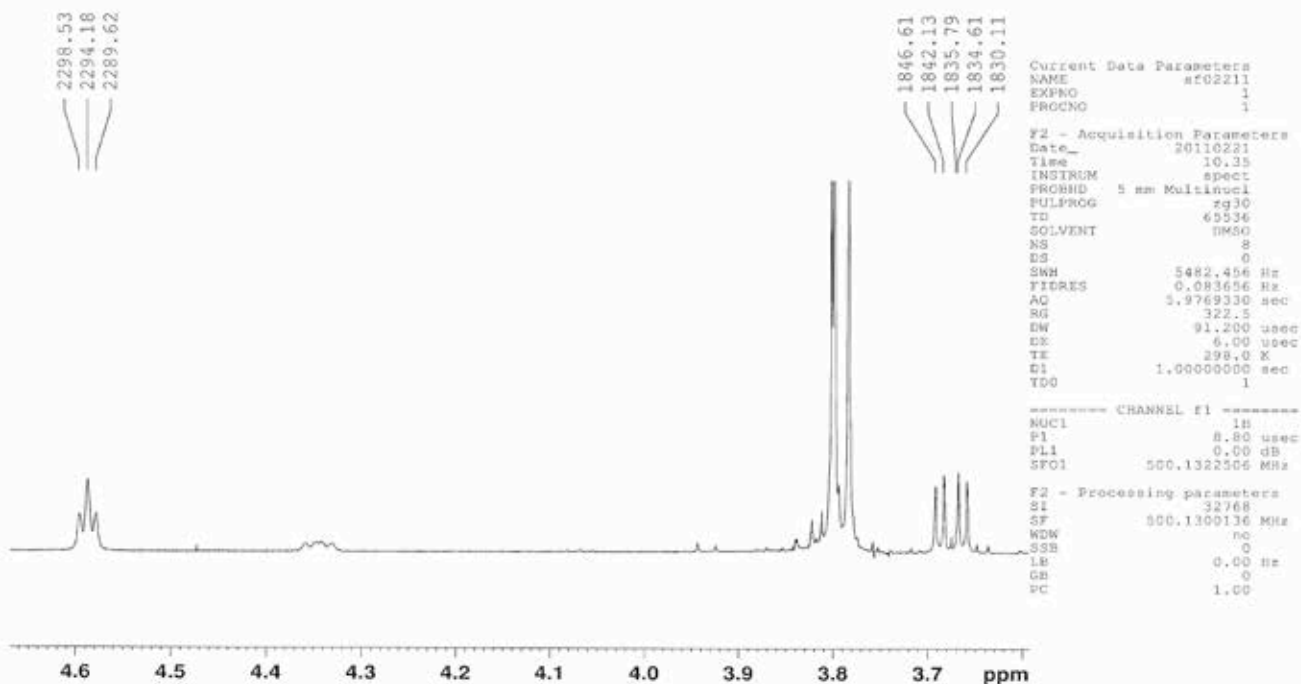

O-ME cyclized

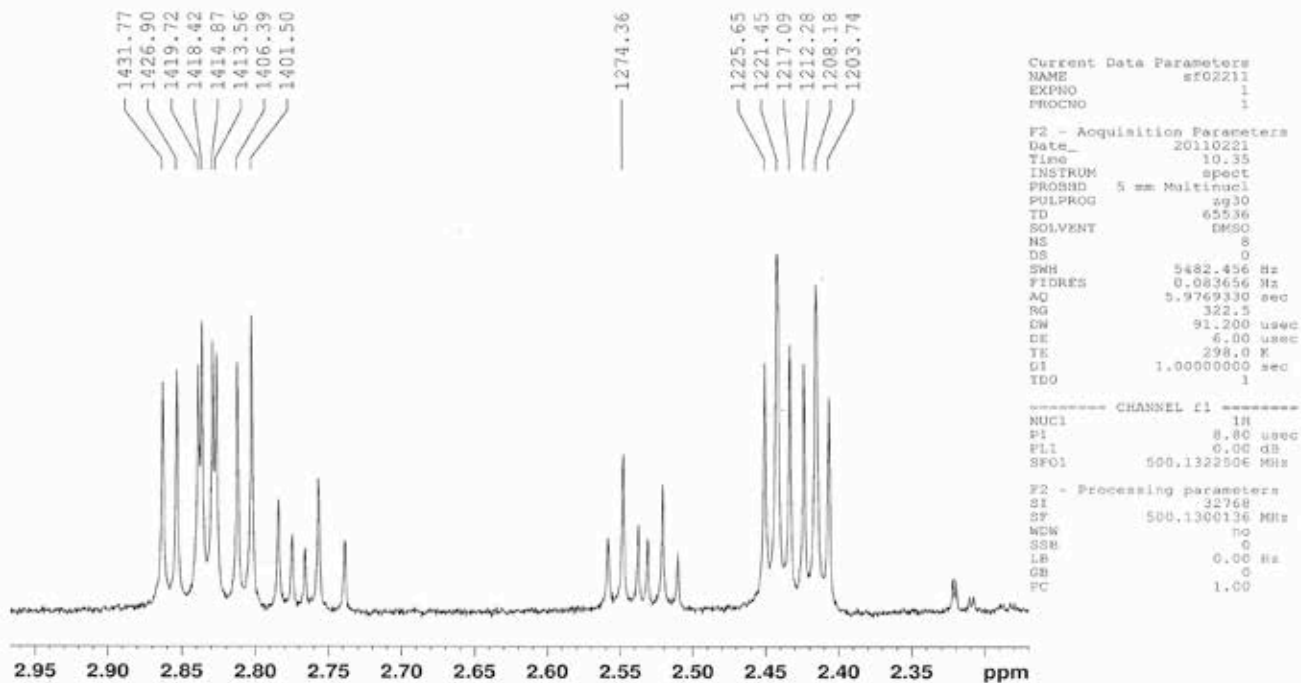

1H\_1H COSY Spectrum of 4a

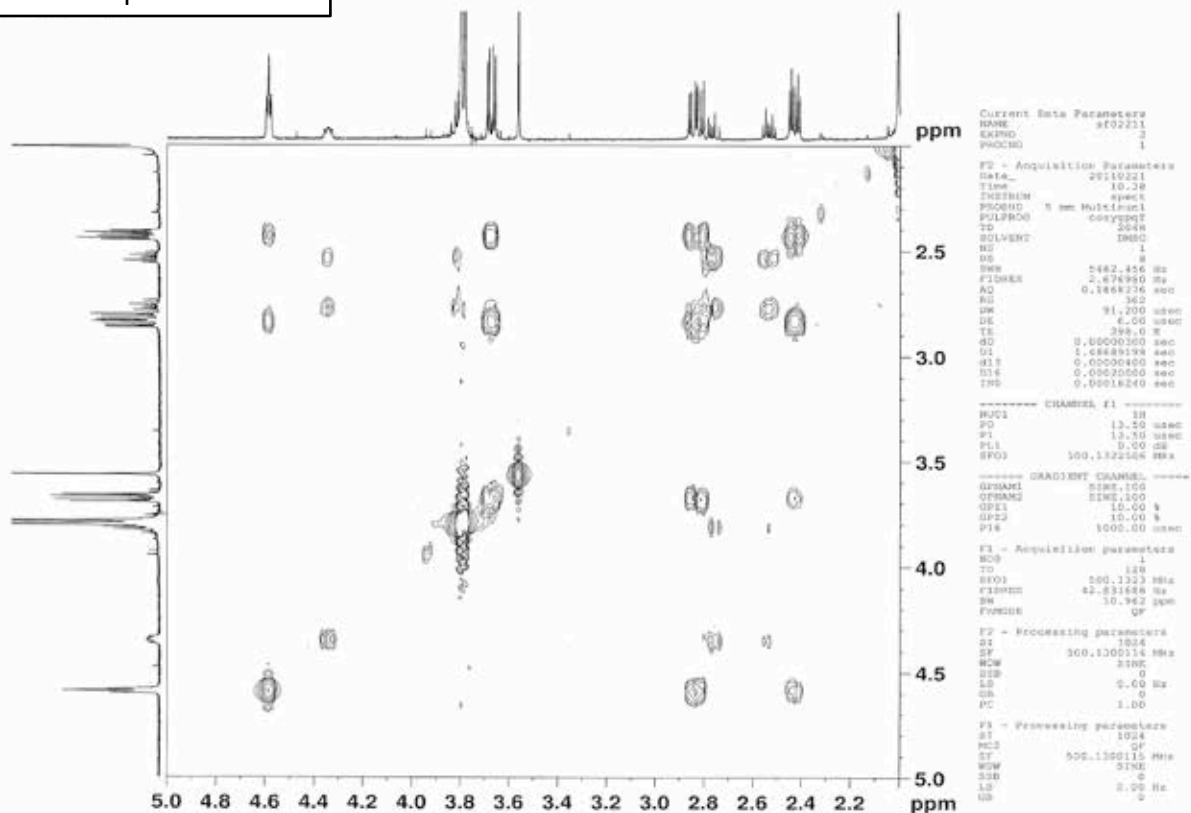

1H\_1H COSY Spectrum of 4a

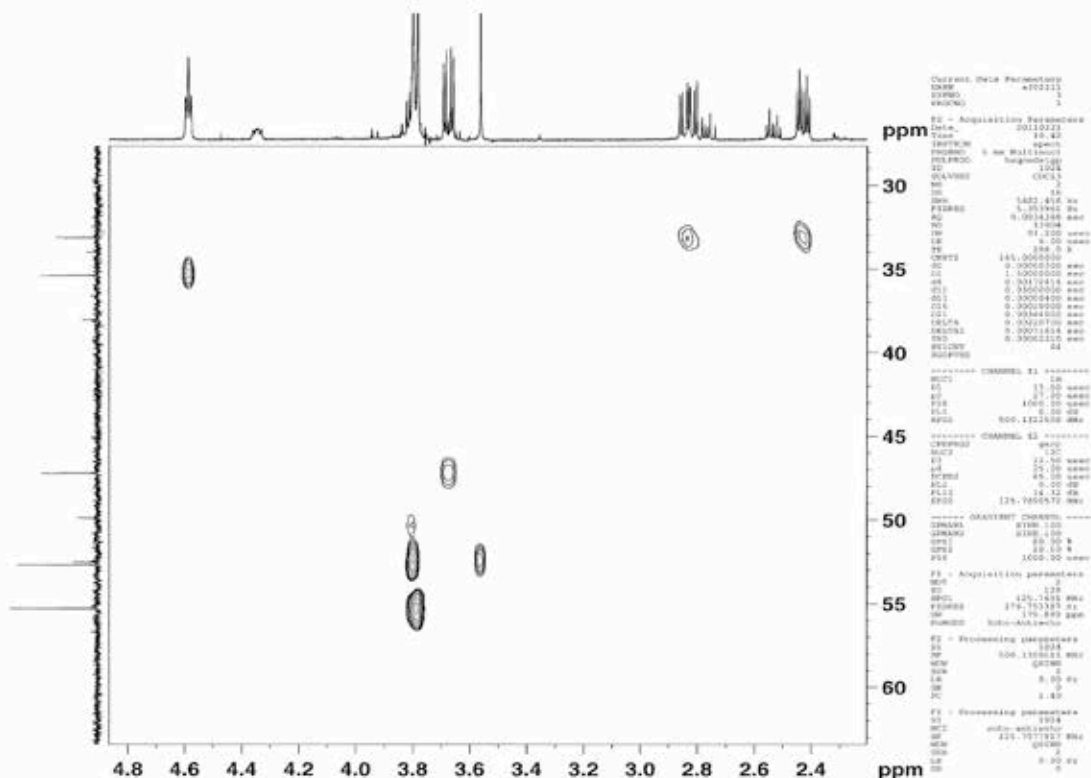





Std Proton parameters  
Sample: 2-Methylstyrene-cyclin-new-H  
File: xp  
Pulse Sequence: s2pul  
Solvent: cdcl3  
Ambient Temperature  
Operator: dpat11  
Mercury-300 "r2d2"  
  
Relax. delay 1.000 sec  
Pulse 30.0 degrees  
Acq. time 3.550 sec  
Width 4803.1 Hz  
18 repetitions  
OBSERVE H1, 300.205655 MHz  
DATA PROCESSING  
FT size 65536  
Total time 1 min, 16 sec

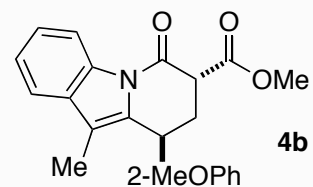

(3.2:1 trans:cis  
mixture of diastereomers)

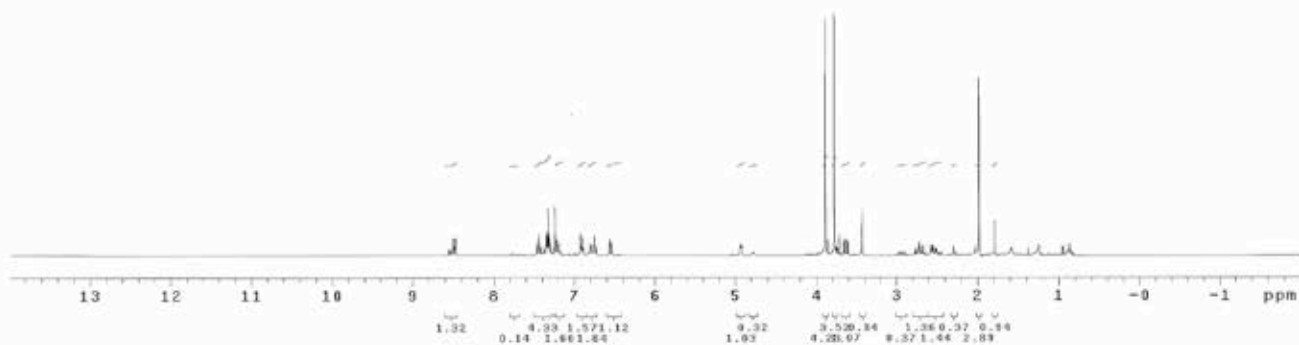

Std Carbon experiment  
Sample: NB-5-OVP-55-A-H  
File: xp  
Pulse Sequence: s2pul  
Solvent: cdcl3  
Temp: 32.0 C / 285.1 K  
Operator: dpat11  
Mercury-300 "r2d2"  
  
Relax. delay 1.000 sec  
Pulse 30.0 degrees  
Acq. time 1.001 sec  
Width 18115.9 Hz  
182 repetitions  
OBSERVE C13, 75.4813164 MHz  
DECOUPLE H1, 300.2251667 MHz  
Power 19 dB  
continuously on  
WALTZ-16 modulated  
DATA PROCESSING  
Line broadening 0.5 Hz  
FT size 65536  
Total time 10 min, 45 sec

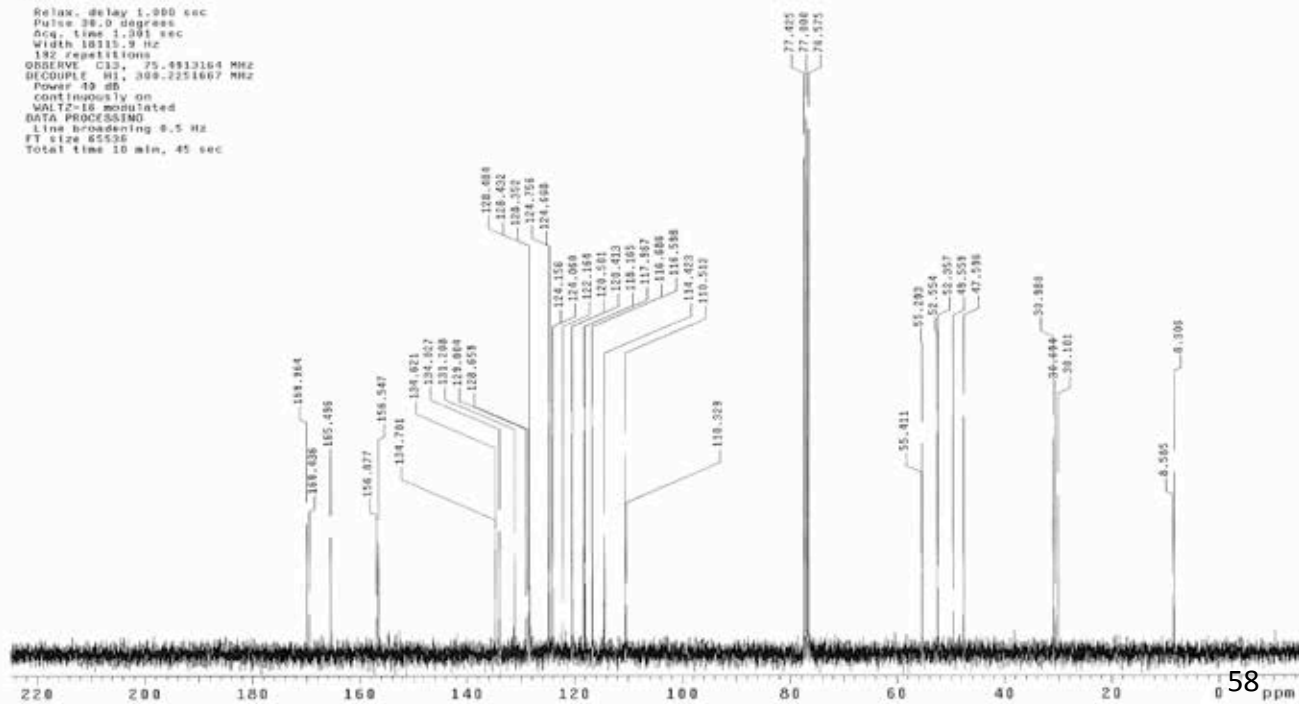

Styrene-cyclized-new  
File: xp  
Pulse Sequence: s2pu1  
Solvent: cdcl3  
Ambient Temperature  
Operator: caw11  
Mercury-300 "r2d2"  
Relax. delay 1.000 sec  
Pulse 39.0 degrees  
Acq. time 3.550 sec  
Width 4882.1 Hz  
57 repetitions  
OBSERVE H1, 300.2104993 MHz  
DATA PROCESSING  
FT size 65536  
Total time 6 min, 34 sec

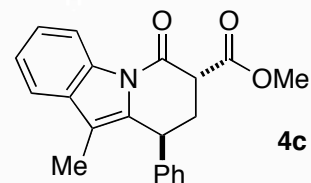

(2.6:1 *trans*:*cis*  
mixture of diastereomers)

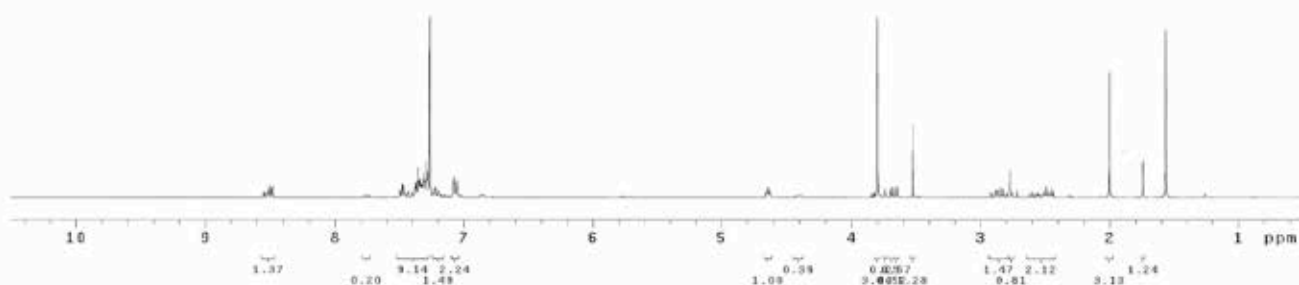

Std Carbon experiment  
Sample: NS-4-DVP-263-B-H  
File: xp  
Pulse Sequence: s2pu1  
Solvent: cdcl3  
Ambient Temperature  
Operator: upat11  
Mercury-300 "r2d2"  
Relax. delay 1.000 sec  
Pulse 30.0 degrees  
Acq. time 1.361 sec  
Width 10111.3 Hz  
2326 repetitions  
OBSERVE C13, 75.4913148 MHz  
DECOUPLE H1, 300.2251087 MHz  
Power 50 dB  
continuously on  
WALTZ-16 modulated  
DATA PROCESSING  
Line Broadening 0.5 Hz  
FT size 65536  
Total time 10 hr, 41 min, 3 sec

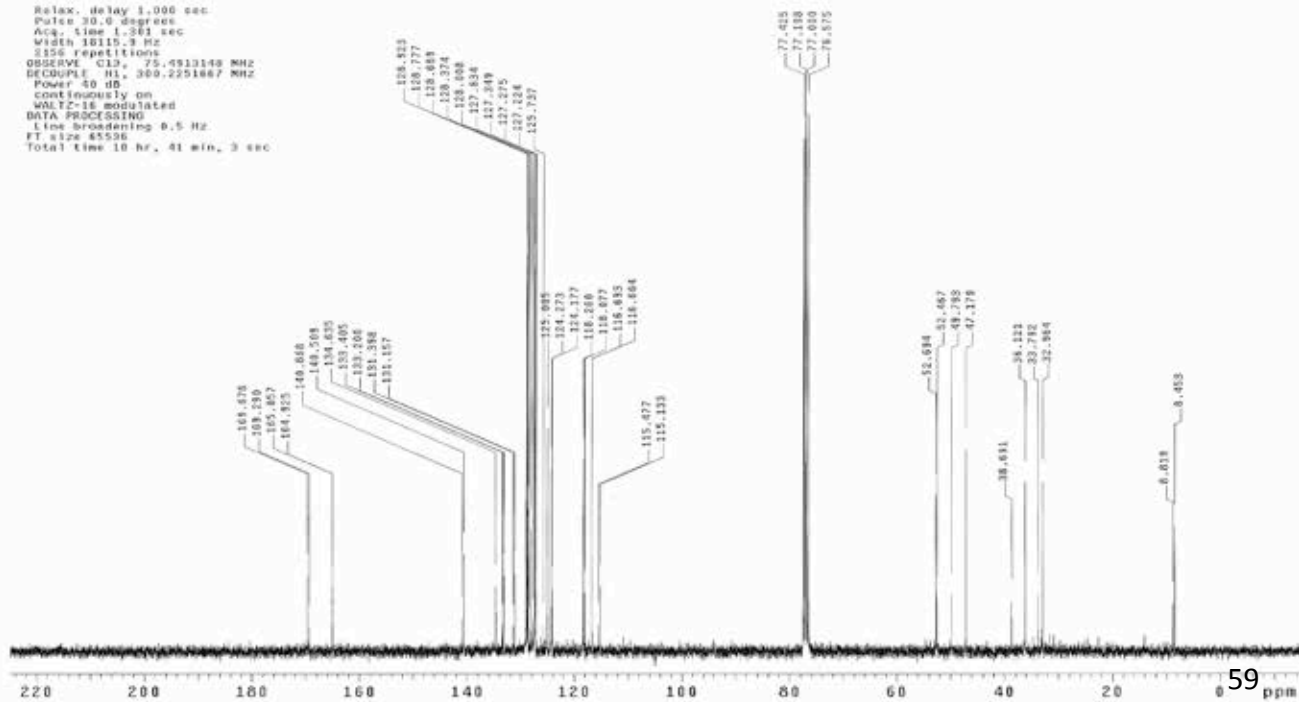

Fluoro-cyclized-H  
 File: hms/france/cavitt/Fluoro-cyclized-H.fid  
 Pulse Sequence: s2pa1  
 Solvent: cdcl3  
 Ambient temperature  
 Operator: cavitt  
 File: Fluoro-cyclized-H  
 Mercury-300 "r2d2"  
 Relax. delay 1.000 sec  
 Pulse 30.0 degrees  
 Acq. time 3.350 sec  
 Width 4800.0 Hz  
 47 repetitions  
 OBSERVE H1 300.2207110 MHz  
 DATA PROCESSING  
 FT size 65536  
 Total time 8 min, 24 sec

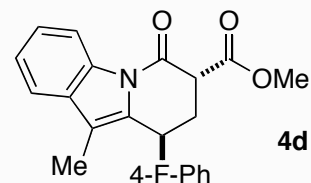

(2.8:1 *trans:cis*  
 mixture of diastereomers)

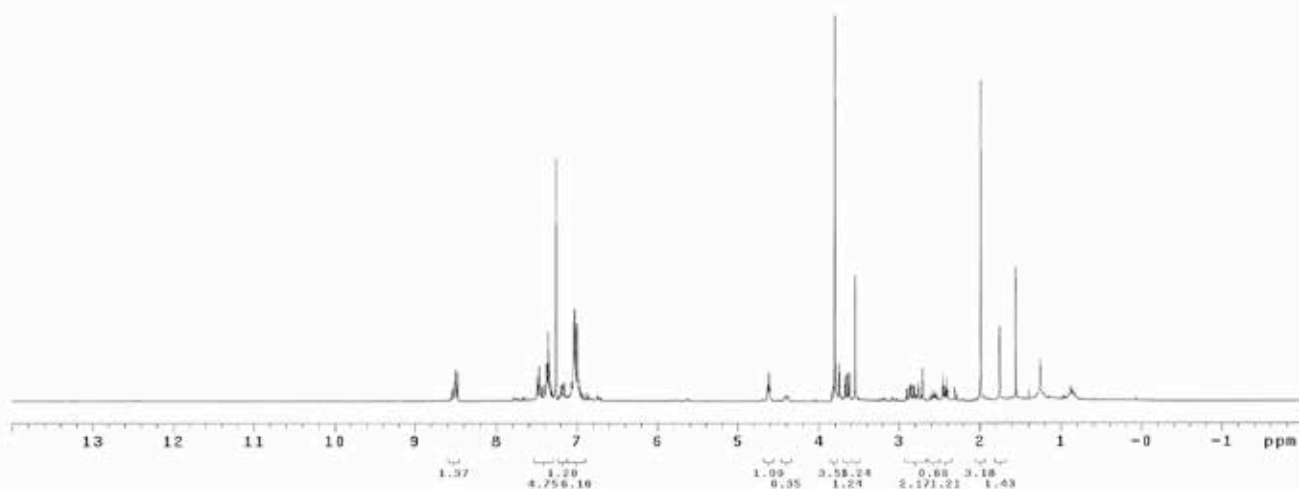

Fluoro-cyclized-C  
 File: hms/france/cavitt/Fluoro-cyclized-C.fid  
 Pulse Sequence: s2pa1  
 Solvent: cdcl3  
 Ambient temperature  
 Operator: cavitt  
 File: Fluoro-cyclized-C  
 Mercury-300 "r2d2"  
 Relax. delay 1.000 sec  
 Pulse 30.0 degrees  
 Acq. time 1.301 sec  
 Width 16215.0 Hz  
 2440 repetitions  
 OBSERVE C13 75.4913154 MHz  
 DECOUPLE H1 300.2251067 MHz  
 Power 40 dB  
 continuously on  
 WALTZ-16 modulated  
 DATA PROCESSING  
 Line broadening 0.5 Hz  
 FT size 65536  
 Total time 85 hr, 48 min, 5 sec

| INDEX | FREQUENCY | PPM     | HEIGHT |
|-------|-----------|---------|--------|
| 1     | 12796.9   | 169.515 | 17.7   |
| 2     | 12772.6   | 169.183 | 7.0    |
| 3     | 12442.6   | 164.021 | 12.5   |
| 4     | 12087.0   | 160.244 | 10.2   |
| 5     | 10282.5   | 136.208 | 12.6   |
| 6     | 10161.5   | 134.685 | 12.0   |
| 7     | 10034.3   | 132.920 | 16.0   |
| 8     | 9892.8    | 131.045 | 14.9   |
| 9     | 9763.3    | 129.595 | 11.1   |
| 10    | 9725.0    | 129.485 | 16.2   |
| 11    | 9739.7    | 128.951 | 23.3   |
| 12    | 9726.9    | 128.848 | 44.8   |
| 13    | 9446.1    | 125.128 | 43.2   |
| 14    | 9385.6    | 124.330 | 29.4   |
| 15    | 9376.6    | 124.235 | 16.4   |
| 16    | 9329.7    | 118.268 | 38.4   |
| 17    | 9316.4    | 118.112 | 16.3   |
| 18    | 8888.1    | 116.677 | 44.9   |
| 19    | 8755.0    | 115.974 | 46.7   |
| 20    | 8733.4    | 115.868 | 58.7   |
| 21    | 8713.6    | 115.817 | 15.5   |
| 22    | 8693.7    | 115.241 | 16.4   |
| 23    | 5842.6    | 77.384  | 403.7  |
| 24    | 5810.5    | 76.969  | 431.6  |
| 25    | 5778.4    | 76.544  | 415.6  |
| 26    | 3981.1    | 52.736  | 29.8   |
| 27    | 3864.0    | 52.549  | 18.4   |
| 28    | 3746.7    | 49.631  | 16.5   |
| 29    | 3687.4    | 47.785  | -9.3   |
| 30    | 3557.6    | 47.128  | 32.5   |
| 31    | 2861.0    | 37.859  | 9.3    |
| 32    | 2679.1    | 35.488  | 27.7   |
| 33    | 2551.4    | 33.788  | 18.2   |
| 34    | 2492.8    | 33.021  | 29.4   |
| 35    | 2482.9    | 33.036  | 24.9   |
| 36    | 638.6     | 8.459   | 21.9   |

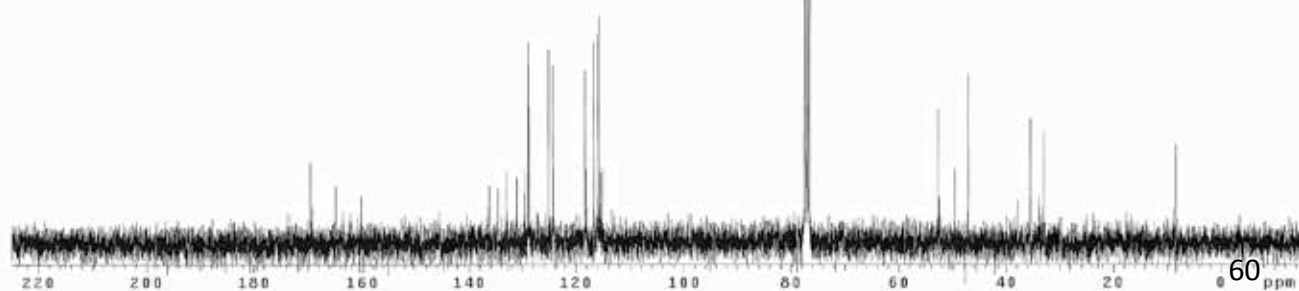

chlor-new  
 File: xp  
 Pulse Sequence: s2pul  
 Solvent: cdcl3  
 Ambient temperature  
 Operator: cavitt  
 Mercury-300 "r2d2"  
 Acq. time 1.301 sec  
 Relax. delay 1.000 sec  
 Pulse 30.0 degrees  
 Acq. time 3.550 sec  
 Width 4800.1 Hz  
 66 repetitions  
 OBSERVE H1, 300.2104991 MHz  
 DATA PROCESSING  
 FT size 65536  
 Total time 8 min, 34 sec

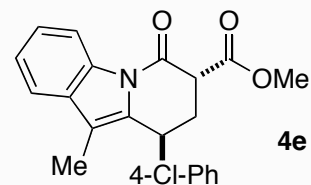

(1.9:1 *trans:cis*  
 mixture of diastereomers)

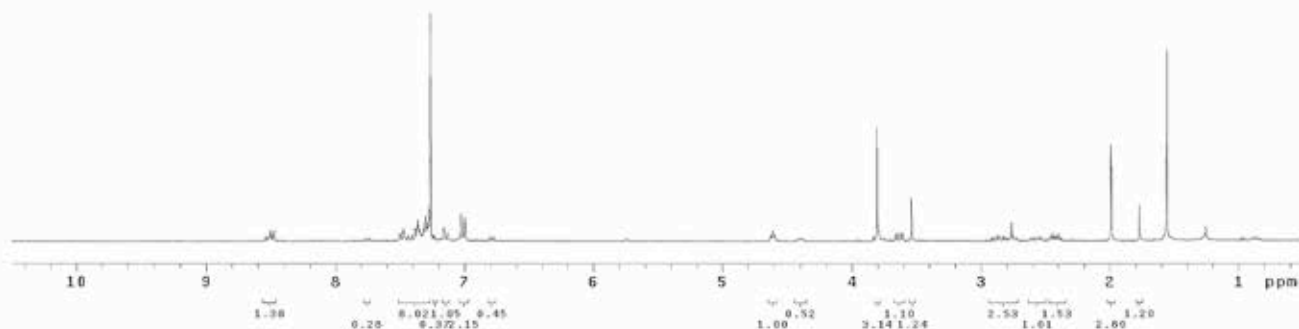

Std Carbon experiment

File: home/franco/cavitt/chloro-carbon.fid  
 Pulse Sequence: s2pul  
 Solvent: cdcl3  
 Ambient temperature  
 Operator: cavitt  
 File: chloro-carbon  
 Mercury-300 "r2d2"

Relax. delay 1.000 sec  
 Pulse 30.0 degrees  
 Acq. time 1.301 sec  
 Width 10233.3 Hz  
 17853 repetitions  
 OBSERVE C13, 75.4913123 MHz  
 DECOUPLE H1, 300.2251067 MHz  
 Power 40 dB  
 continuously on  
 WALTZ-16 modulated  
 DATA PROCESSING  
 Line broadening 0.5 Hz  
 FT size 65536  
 Total time 85 hr, 48 min, 5 sec

| INDEX | FREQUENCY | PPM     | HEIGHT | INDEX | FREQUENCY | PPM    | HEIGHT |
|-------|-----------|---------|--------|-------|-----------|--------|--------|
| 1     | 12794.5   | 169.483 | 19.6   | 40    | 3884.2    | 52.777 | 39.2   |
| 2     | 12771.3   | 169.175 | 8.6    | 41    | 3867.1    | 52.550 | 15.5   |
| 3     | 12430.8   | 164.774 | 15.6   | 42    | 3740.3    | 49.599 | 17.4   |
| 4     | 12431.0   | 164.678 | 7.1    | 43    | 3558.0    | 47.131 | 51.5   |
| 5     | 10525.0   | 139.920 | 8.6    | 44    | 2869.7    | 38.013 | 14.5   |
| 6     | 10501.8   | 139.113 | 28.5   | 45    | 2659.3    | 35.677 | 41.2   |
| 7     | 10164.0   | 134.040 | 20.0   | 46    | 2539.6    | 33.641 | 15.3   |
| 8     | 10056.0   | 133.717 | 21.9   | 47    | 2504.0    | 33.180 | 7.7    |
| 9     | 10045.7   | 133.071 | 9.7    | 48    | 2404.9    | 32.918 | 39.7   |
| 10    | 10025.2   | 132.800 | 10.2   | 49    | 2241.1    | 29.888 | 8.8    |
| 11    | 10011.4   | 132.817 | 25.0   | 50    | 875.4     | 8.848  | 13.8   |
| 12    | 8807.5    | 116.240 | 9.3    | 51    | 843.3     | 8.522  | 32.5   |
| 13    | 8852.0    | 131.042 | 24.4   |       |           |        |        |
| 14    | 8767.1    | 129.360 | 41.0   |       |           |        |        |
| 15    | 8740.6    | 129.138 | 124.4  |       |           |        |        |
| 16    | 8740.5    | 129.028 | 18.6   |       |           |        |        |
| 17    | 8733.9    | 128.941 | 10.1   |       |           |        |        |
| 18    | 8728.4    | 128.667 | 45.6   |       |           |        |        |
| 19    | 8719.5    | 128.750 | 106.1  |       |           |        |        |
| 20    | 8635.0    | 127.288 | 7.7    |       |           |        |        |
| 21    | 8600.1    | 127.188 | 35.0   |       |           |        |        |
| 22    | 8550.3    | 126.508 | 8.0    |       |           |        |        |
| 23    | 8455.0    | 125.220 | 52.1   |       |           |        |        |
| 24    | 8390.0    | 124.385 | 56.0   |       |           |        |        |
| 25    | 8363.4    | 124.298 | 19.7   |       |           |        |        |
| 26    | 8176.4    | 121.529 | 7.7    |       |           |        |        |
| 27    | 8164.7    | 120.807 | 19.5   |       |           |        |        |
| 28    | 8133.9    | 118.344 | 32.4   |       |           |        |        |
| 29    | 8121.8    | 118.182 | 18.9   |       |           |        |        |
| 30    | 8113.0    | 118.754 | 20.0   |       |           |        |        |
| 31    | 8111.2    | 116.718 | 61.7   |       |           |        |        |
| 32    | 8128.9    | 115.641 | 8.1    |       |           |        |        |
| 33    | 8111.1    | 115.382 | 20.3   |       |           |        |        |
| 34    | 8100.1    | 118.742 | 9.7    |       |           |        |        |
| 35    | 5844.6    | 77.420  | 809.4  |       |           |        |        |
| 36    | 5828.0    | 77.201  | 33.7   |       |           |        |        |
| 37    | 5812.5    | 76.898  | 602.2  |       |           |        |        |
| 38    | 5781.0    | 76.578  | 286.9  |       |           |        |        |
| 39    | 4683.2    | 54.188  | 7.6    |       |           |        |        |

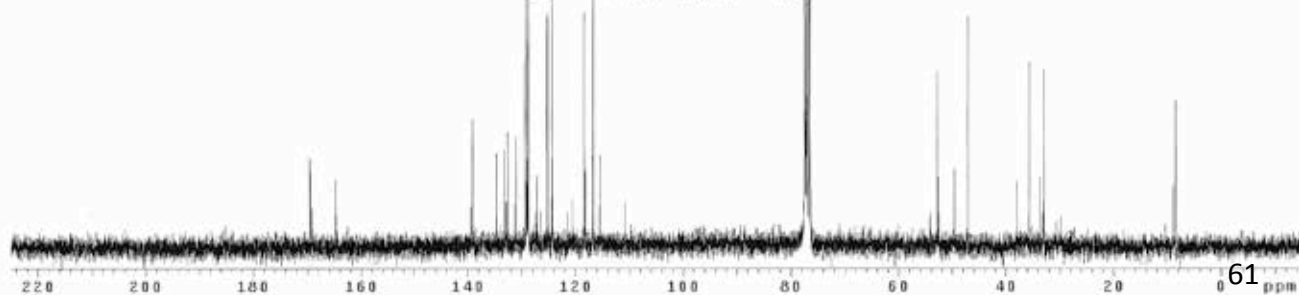



Std Proton parameters  
Sample: 1Brindole-diazo-H  
File: xp  
Pulse Sequence: s2pul  
Solvent: cdcl3  
Temp: 25.0 C / 293.1 K  
Operator: dpatt11  
Mercury-300 "r2d2"  
Relax. delay 1.000 sec  
Pulse 30.0 degrees  
Acq. time 3.350 sec  
Width 4003.1 Hz  
IS repetitions  
OBSERVE H1, 300.2105002 MHz  
DATA PROCESSING  
FT size 65536  
Total time 1 min, 10 sec

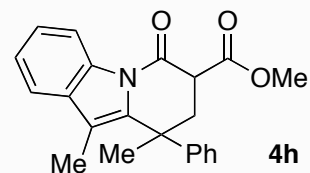

(1:1:1 mixture of diastereomers)

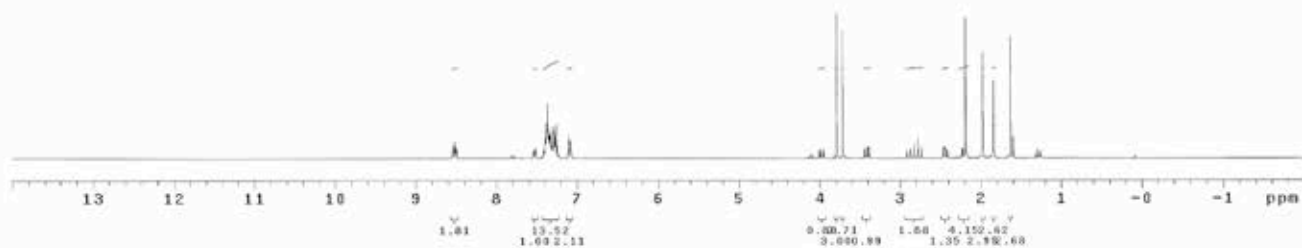

Std Carbon experiment  
Sample: 1Brindole-diazo-H  
File: xp  
Pulse Sequence: s2pul  
Solvent: cdcl3  
Temp: 20.0 C / 293.1 K  
Operator: dpatt11  
Mercury-300 "r2d2"  
Relax. delay 1.000 sec  
Pulse 30.0 degrees  
Acq. time 1.301 sec  
Width 10115.3 Hz  
240 repetitions  
OBSERVE C13, 75.4000043 MHz  
DECOUPLE H1, 300.2100401 MHz  
Power 40 dB  
continuously on  
WALTZ-16 modulated  
DATA PROCESSING  
1 line broadening 0.5 Hz  
FT size 65536  
Total time 7 hr, 7 sec

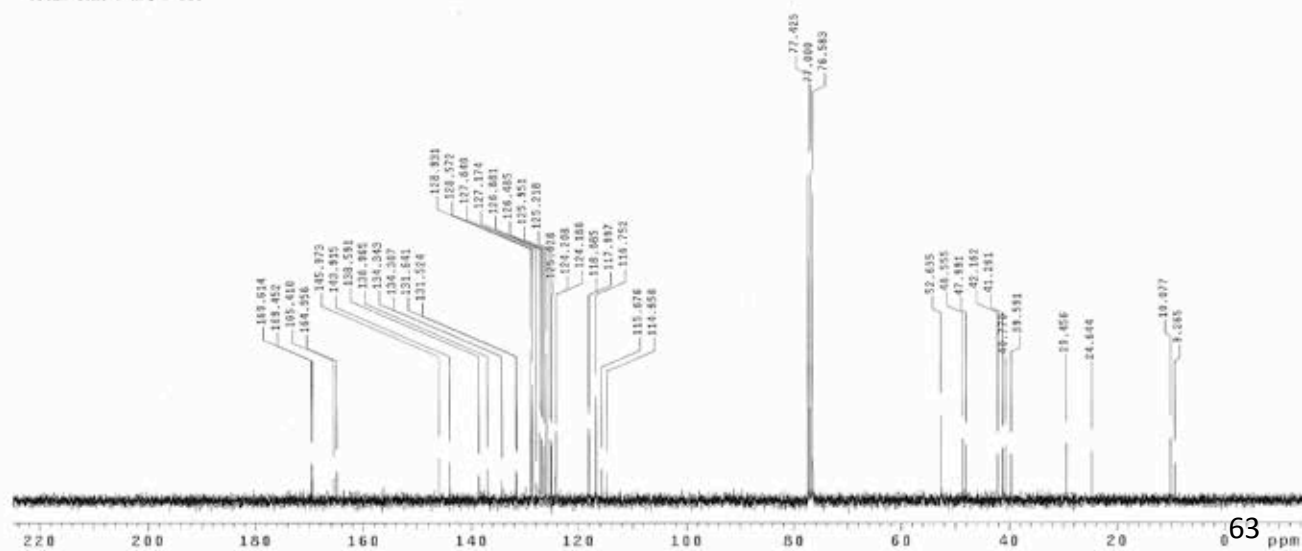

Std Proton parameters  
Sample: NB-5-DVP-58-A-H  
File: xp  
Pulse Sequence: s2pul  
Solvent: cdcl3  
Temp: 22.8 C / 285.1 K  
Operator: dpat11  
Mercury-360 "r2d2"  
Relax. delay 1.000 sec  
Pulse 30.0 degrees  
Acq. time 3.550 sec  
Width 4803.1 Hz  
18 repetitions  
OBSERVE H1, 300.2237171 MHz  
DATA PROCESSING  
FT size 65536  
Total time 1 min, 16 sec

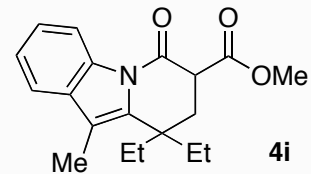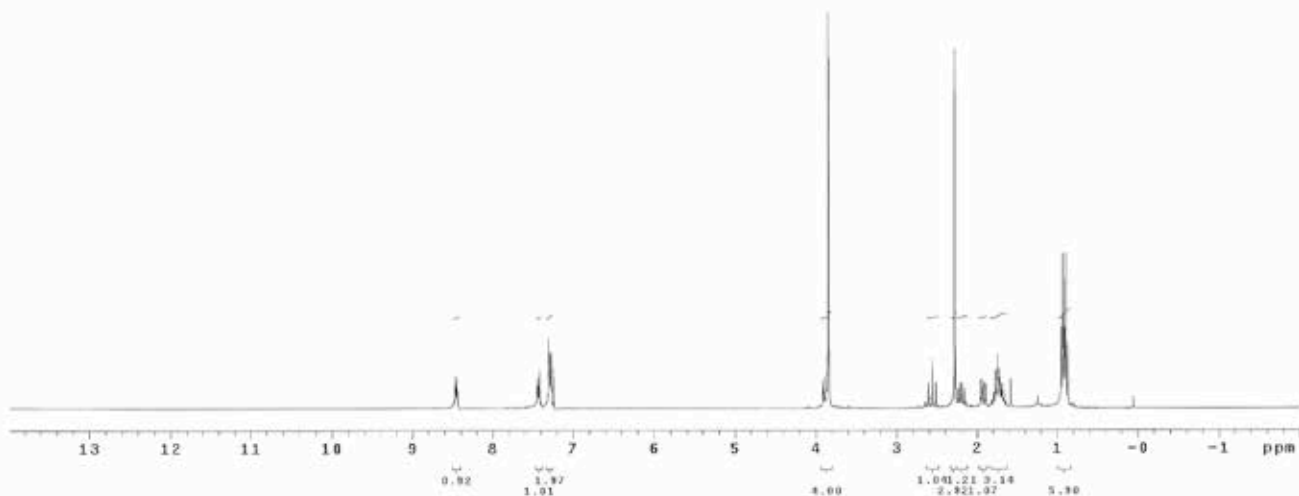

Std Carbon experiment  
Sample: NB-5-DVP-58-A-H  
File: xp  
Pulse Sequence: s2pul  
Solvent: cdcl3  
Temp: 22.8 C / 285.1 K  
Operator: dpat11  
Mercury-360 "r2d2"  
Relax. delay 1.000 sec  
Pulse 30.0 degrees  
Acq. time 1.301 sec  
Width 18135.9 Hz  
144 repetitions  
OBSERVE C13, 75.4813148 MHz  
DECUPLE H1, 300.2251607 MHz  
Power 49 dB  
continuously on  
WALTZ-16 modulated  
DATA PROCESSING  
Line broadening 8.5 Hz  
FT size 65536  
Total time 10 min, 45 sec

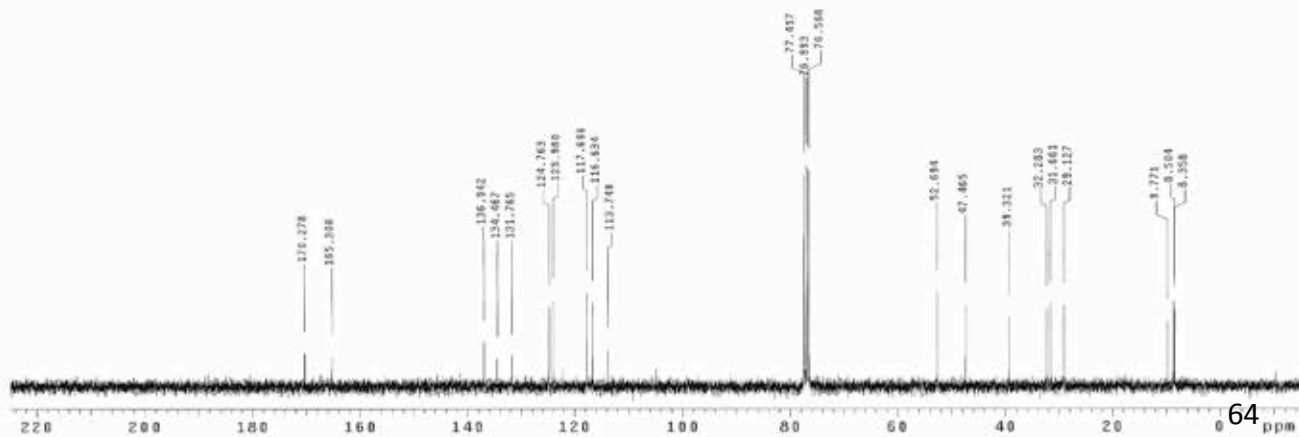



Std Proton parameters  
Sample: NB-5-OVP-50-B-M  
File: KP  
Pulse Sequence: zgpg30  
Solvent: cdcl3  
Ambient temperature  
Operator: dpat11  
Mercury-300 "r1d2"  
Relax. delay 1.000 sec  
Pulse 30.0 degrees  
Acq. time 3.250 sec  
Width 4800.0 Hz  
IS repetitions  
OBSERVE F1: 300.2237117 MHz  
DATA PROCESSING  
F1 size 65536  
Total time 1 min, 10 sec

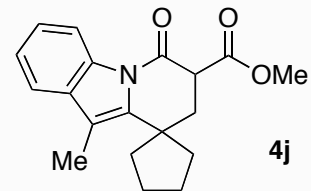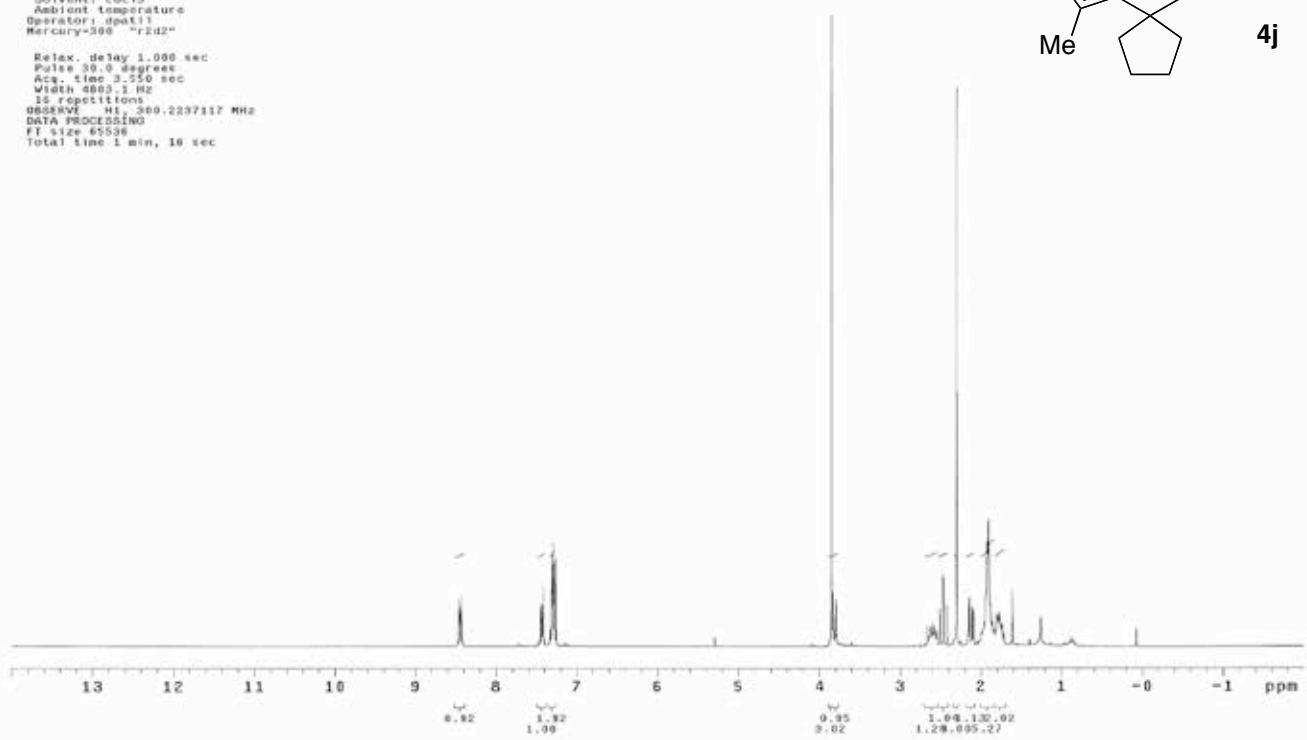

Std Carbon experiment  
Sample: NB-5-OVP-50-B-M  
File: KP  
Pulse Sequence: zgpg30  
Solvent: cdcl3  
Ambient temperature  
Operator: dpat11  
Mercury-300 "r1d2"  
Relax. delay 1.000 sec  
Pulse 30.0 degrees  
Acq. time 1.301 sec  
Width 16115.0 Hz  
256 repetitions  
OBSERVE C13: 75.4913148 MHz  
DECOUPLE H1: 300.2251007 MHz  
Power 40 dB  
continuously on  
WALTZ-16 modulated  
DATA PROCESSING  
Line broadening 0.5 Hz  
F1 size 65536  
Total time 10 min, 45 sec

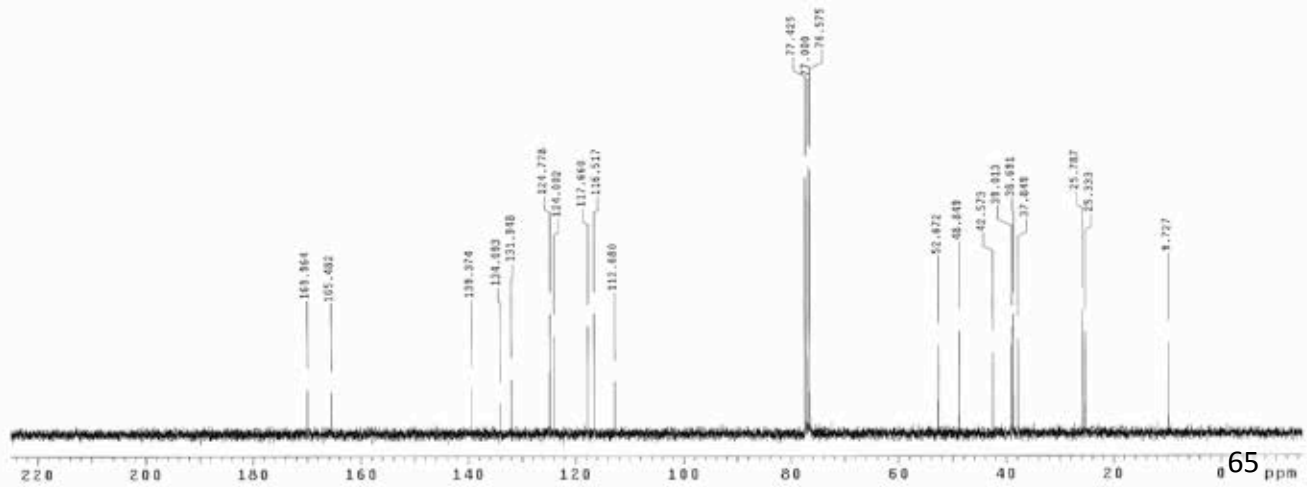

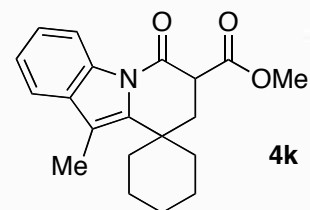

Green cap  
 Sample: NB-5-DVP-53-B-H  
 File: xp  
 Pulse Sequence: s2pul  
 Solvent: cdcl3  
 Temp: 20.0 C / 283.1 K  
 Operator: dpat11  
 Mercury-300 "r2d2"  
 Relax, delay 1.000 sec  
 Pulse 30.0 degrees  
 Acq. time 3.550 sec  
 Width 4865.1 Hz  
 18 repetitions  
 OBSERVE H1, 300.2237170 MHz  
 DATA PROCESSING  
 FT size 65536  
 Total time 1 min, 16 sec

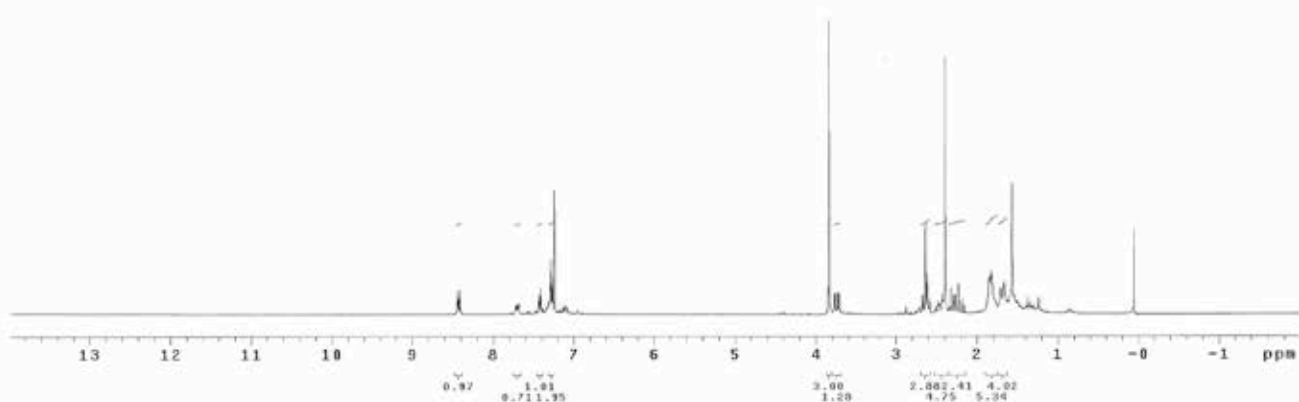

Std Carbon experiment  
 Sample: NB-5-DVP-53-B-H  
 File: xp  
 Pulse Sequence: s2pul  
 Solvent: cdcl3  
 Temp: 20.0 C / 293.1 K  
 Operator: dpat11  
 Mercury-300 "r2d2"  
 Relax, delay 1.000 sec  
 Pulse 30.0 degrees  
 Acq. time 1.381 sec  
 Width 18115.3 Hz  
 3260 repetitions  
 OBSERVE C13, 75.4913131 MHz  
 DECOUPLE H1, 300.2251667 MHz  
 Power 50 dB  
 continuously on  
 WALTZ-16 modulated  
 DATA PROCESSING  
 Line broadening 0.5 Hz  
 FT size 65536  
 Total time 703 hr, 12 min, 2 sec

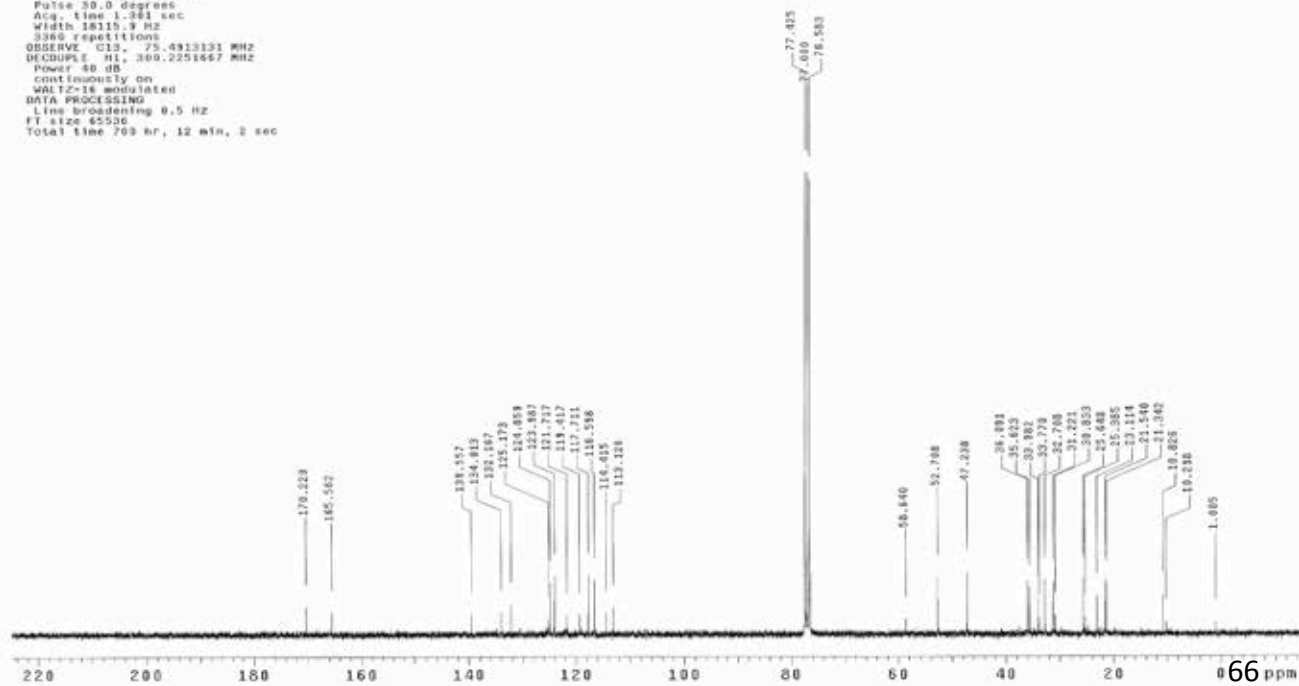

Std Proton parameters  
Sample: TBDPS-15a01-H  
File: xp  
Pulse Sequence: zgpg30  
Solvent: cdcl3  
Temp: 29.9 C / 283.1 K  
Operator: dpat11  
Mercury-300 "r202"  
Relax. delay 1.000 sec  
Pulse 30.0 degrees  
Acq. time 3.550 sec  
Width 4003.1 Hz  
18 repetitions  
OBSERVE H1, 300.2185002 MHz  
DATA PROCESSING  
FT size 65536  
Total time 1 min, 16 sec

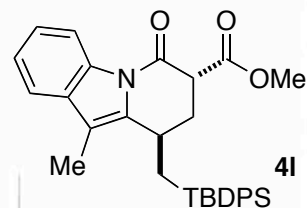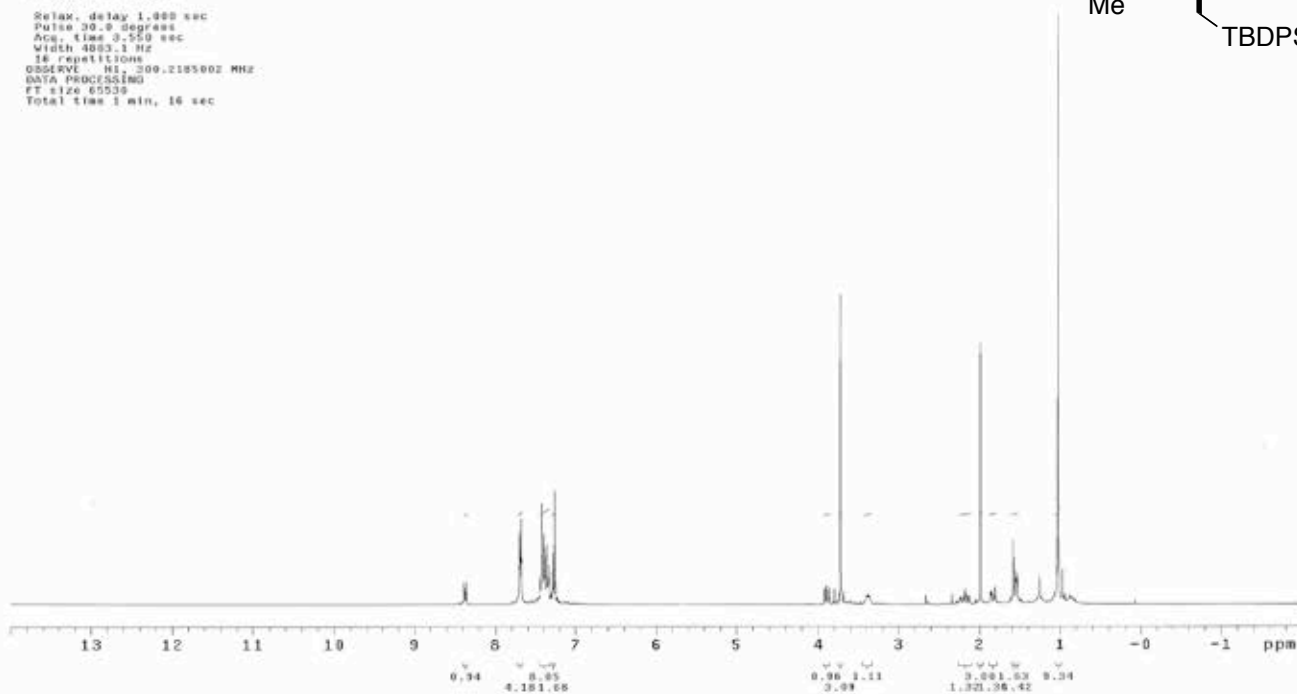

Std Carbon experiment  
Sample: HS-4-DVP-173-B-C  
File: xp  
Pulse Sequence: zgpg30  
Solvent: cdcl3  
Ambient temperature  
Operator: dpat11  
Mercury-300 "r202"  
Relax. delay 1.000 sec  
Pulse 30.0 degrees  
Acq. time 1.383 sec  
Width 18115.3 Hz  
3256 repetitions  
OBSERVE C13, 75.4913131 MHz  
DECUPLE H1, 300.2251007 MHz  
Power 50 dB  
continuously on  
WALTZ-16 modulated  
DATA PROCESSING  
Line broadening 0.5 Hz  
FT size 85536  
Total time 1056 hr, 25 min, 47 sec

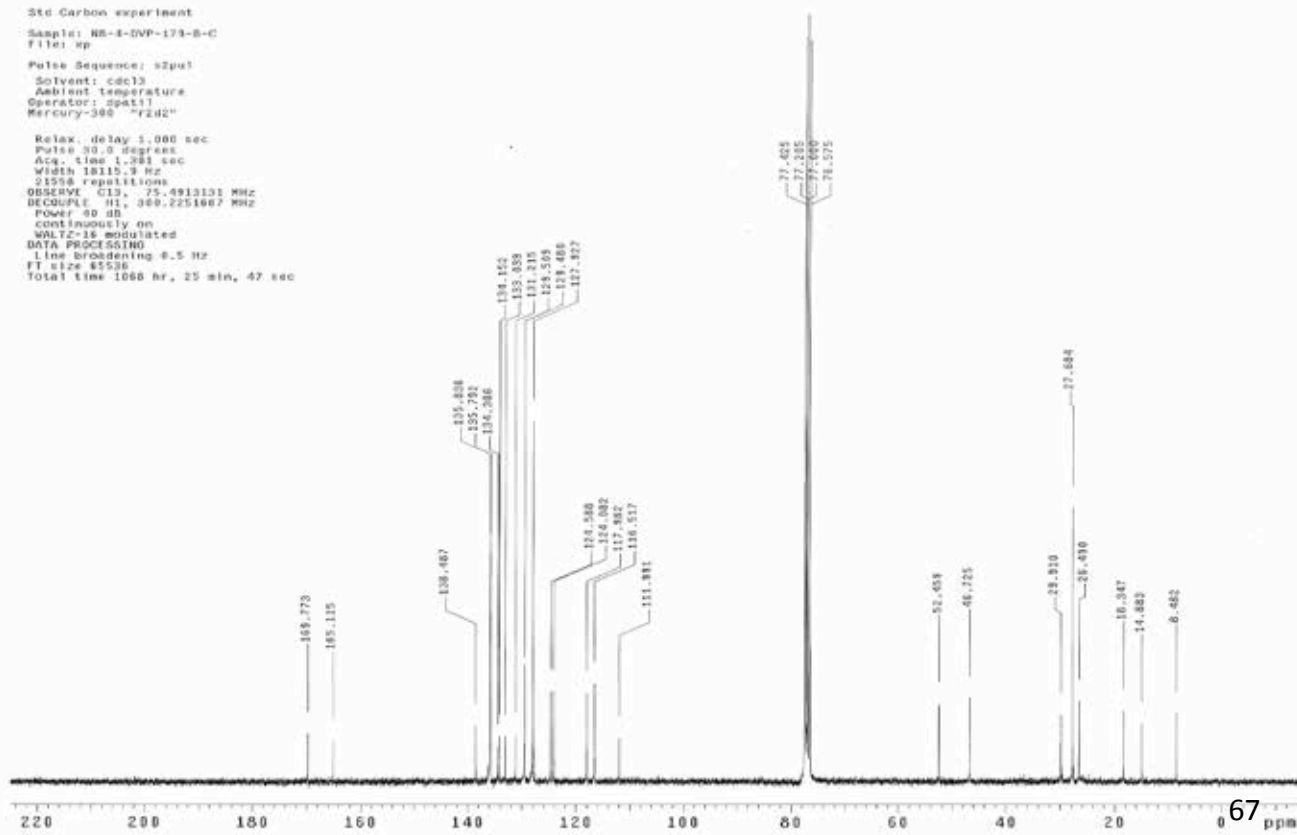

nphth=cyclized=new-H  
File: xp  
Pulse Sequence: s2pul  
Solvent: cdcl3  
Temp: 22.8 C / 295.1 K  
Operator: caw15  
Mercury-300 "r2d2"  
Relax. delay 1.000 sec  
Pulse 30.0 degrees  
Acq. time 3.550 sec  
Width 4803.1 Hz  
65 repetitions  
OBSERVE H1, 300.2105000 MHz  
DATA PROCESSING  
FT size 65536  
Total time 8 min, 34 sec

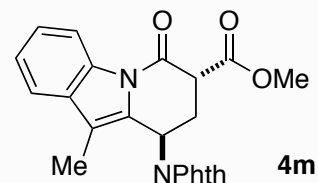

(4.8:1 trans:cis  
mixture of diastereomers)

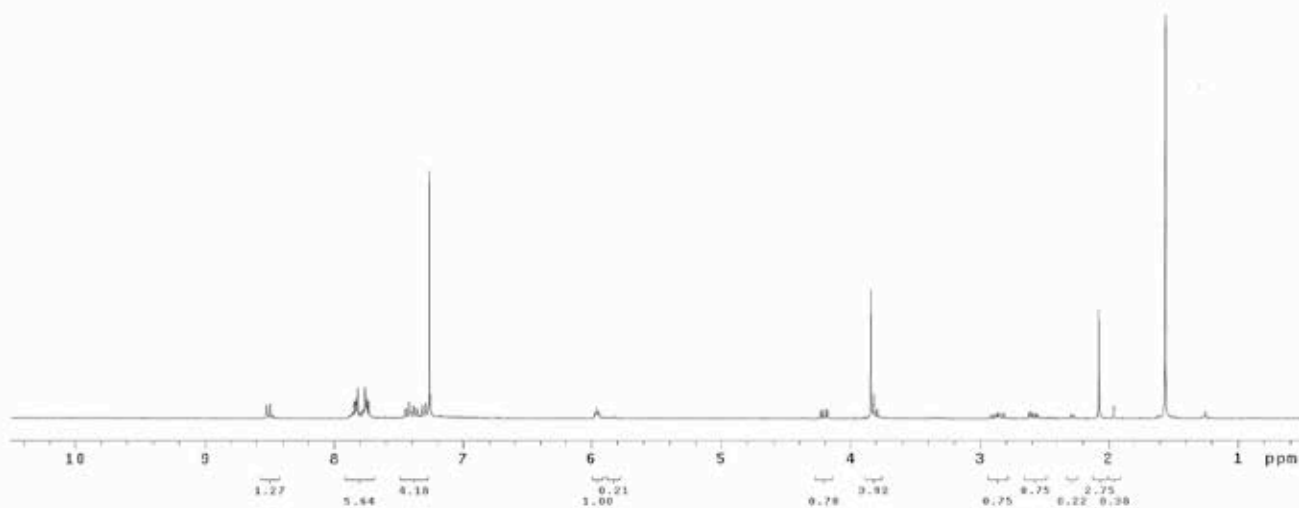

Std Carbon experiment  
Sample: NB-4-DVP-200-A-H  
File: xp  
Pulse Sequence: s2pul  
Solvent: cdcl3  
Ambient temperature  
Operator: spaw11  
Mercury-300 "r2d2"  
Relax. delay 1.000 sec  
Pulse 30.0 degrees  
Acq. time 1.391 sec  
Width 16215.3 Hz  
1520 repetitions  
OBSERVE C13, 75.4915148 MHz  
DECOUPLE H1, 300.2251667 MHz  
Power 40 dB  
continuously on  
WALTZ-16 modulated  
DATA PROCESSING  
Line broadening 0.5 Hz  
FT size 65536  
Total time 18 hr, 41 min, 3 sec

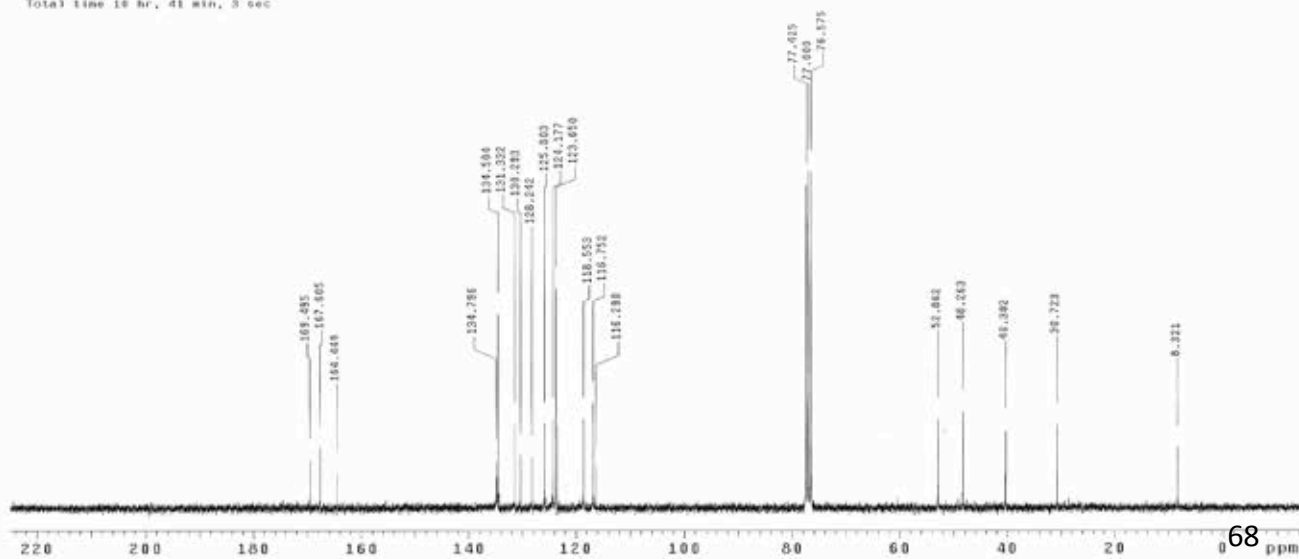

Std Proton parameters  
 File: hoes/franco/cavitt/thioetherphenyl.fid  
 Pulse Sequence: s2pul  
 Solvent: cdcl3  
 Temp: 25.0 C / 296.1 K  
 Operator: cavitt  
 File: thioetherphenyl  
 Mercury-386 "r2d2"  
 Relax. delay 1.000 sec  
 Pulse 30.0 degrees  
 Acq. time 3.550 sec  
 Width 4093.1 Hz  
 64 repetitions  
 OBSERVE H1, 300.2237100 MHz  
 DATA PROCESSING  
 FT size 65536  
 Total time 8 min, 24 sec

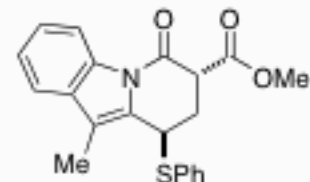

**4n**  
 6.3:1 mixture  
 of diastereomers

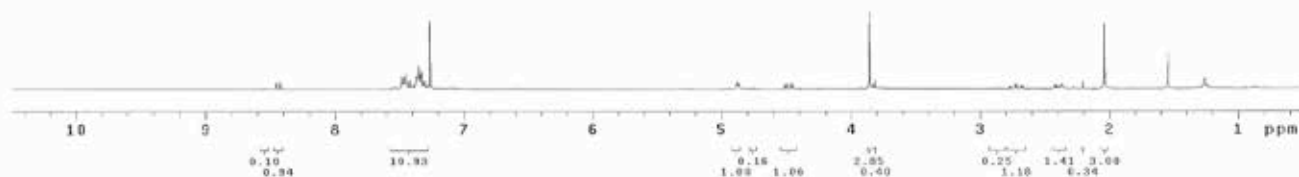

thioethercyclized13c  
 File: xp  
 Pulse Sequence: s2pul  
 Solvent: cdcl3  
 Ambient temperature  
 Operator: Cavitt  
 Mercury-386 "r2d2"  
 Relax. delay 1.000 sec  
 Pulse 30.0 degrees  
 Acq. time 1.301 sec  
 Width 18125.3 Hz  
 108072502 repetitions  
 OBSERVE C13, 75.4912129 MHz  
 DECOUPLE H1, 200.2251867 MHz  
 Power 40 dB  
 CONTINUOUSLY ON  
 WALTZ-16 modulated  
 DATA PROCESSING  
 Line broadening 0.5 Hz  
 FT size 65536  
 Total time 05:01:2 hr, 58 min, +8 sec

| INDEX | FREQUENCY | PPH     | HEIGHT |
|-------|-----------|---------|--------|
| 1     | 12806.6   | 169.644 | 6.1    |
| 2     | 12419.0   | 164.517 | 5.0    |
| 3     | 10109.0   | 134.704 | 8.9    |
| 4     | 10154.0   | 134.588 | 36.3   |
| 5     | 10006.4   | 132.551 | 6.9    |
| 6     | 9857.7    | 130.581 | 6.4    |
| 7     | 8639.4    | 110.471 | 5.9    |
| 8     | 8764.0    | 119.359 | 36.2   |
| 9     | 8757.1    | 119.248 | 4.5    |
| 10    | 8223.4    | 108.001 | 17.3   |
| 11    | 8485.1    | 115.845 | 14.6   |
| 12    | 8384.5    | 114.312 | 15.7   |
| 13    | 8951.0    | 118.570 | 16.3   |
| 14    | 8805.0    | 116.644 | 19.3   |
| 15    | 5844.5    | 77.020  | 289.1  |
| 16    | 5826.0    | 77.200  | 18.2   |
| 17    | 5812.5    | 76.995  | 300.8  |
| 18    | 5781.0    | 76.578  | 293.6  |
| 19    | 3985.0    | 52.799  | 14.0   |
| 20    | 3543.6    | 46.840  | 16.4   |
| 21    | 3022.2    | 40.034  | 15.2   |
| 22    | 2238.0    | 29.657  | 13.4   |
| 23    | 626.1     | 8.294   | 10.7   |

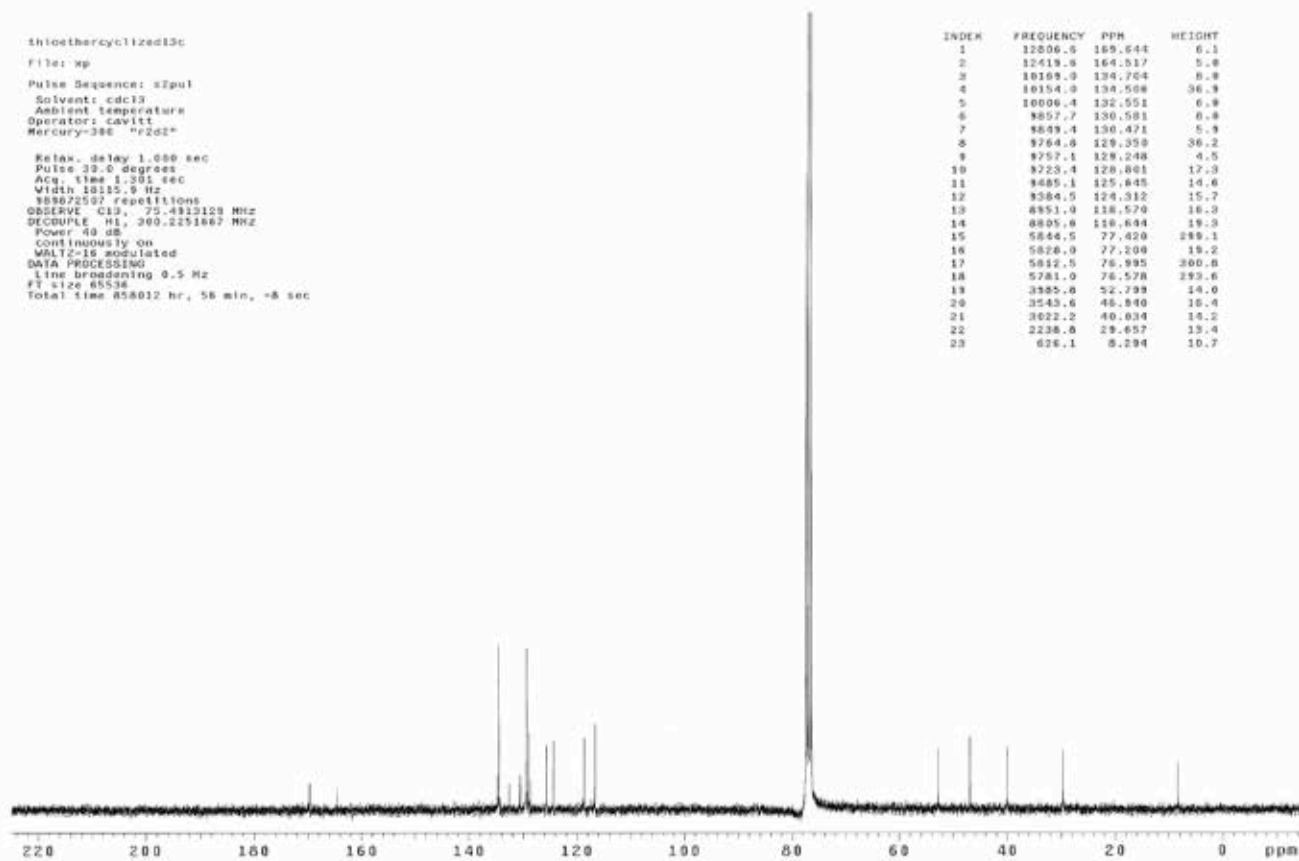

DHF-cyclized-B  
 File: xp  
 Pulse Sequence: s2pul  
 Solvent: cdcl3  
 Temp: 22.0 C / 285.1 K  
 Operator: cavitt  
 Mercury-300 "r2d2"  
 Relax: delay 1.000 sec  
 Pulse 30.0 degrees  
 Acq. time 3.550 sec  
 Width 4003.1 Hz  
 50 repetitions  
 OBSERVE H1, 300.2104991 MHz  
 DATA PROCESSING  
 FT size 65335  
 Total time 8 min, 34 sec

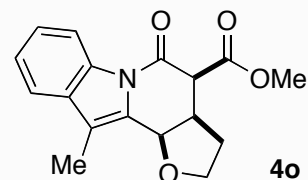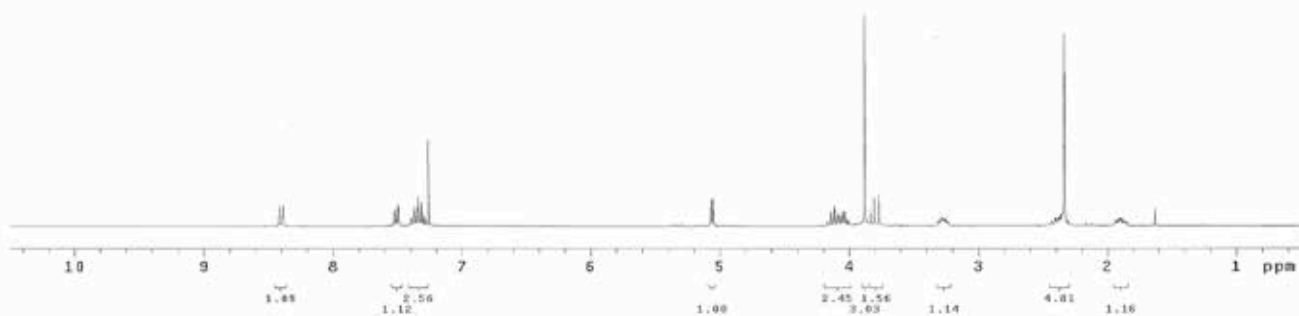

DHF-cyclized-C  
 File: xp  
 Pulse Sequence: s2pul  
 Solvent: cdcl3  
 Temp: 22.0 C / 285.1 K  
 Operator: cavitt  
 Mercury-300 "r2d2"  
 Relax: delay 1.000 sec  
 Pulse 30.0 degrees  
 Acq. time 1.391 sec  
 Width 30115.3 Hz  
 45000269 repetitions  
 OBSERVE C13, 75.4900047 MHz  
 DECOUPLE H1, 300.2199401 MHz  
 Power 43 dB  
 Continuously on  
 WALTZ-16 modulated  
 DATA PROCESSING  
 Line broadening 0.5 Hz  
 FT size 45536  
 Total time 85801 hr, 17 min, 28 sec

| INDEX | FREQUENCY | PPM     | HEIGHT |
|-------|-----------|---------|--------|
| 1     | 12778.8   | 169.279 | 10.0   |
| 2     | 12387.4   | 164.894 | 5.5    |
| 3     | 10257.2   | 124.551 | 6.7    |
| 4     | 9038.5    | 100.991 | 7.9    |
| 5     | 8731.0    | 108.904 | 6.1    |
| 6     | 8501.5    | 125.805 | 18.8   |
| 7     | 8378.8    | 124.239 | 17.5   |
| 8     | 8023.3    | 119.530 | 7.7    |
| 9     | 8774.1    | 119.876 | 22.1   |
| 10    | 8284.7    | 118.396 | 20.2   |
| 11    | 5844.4    | 77.420  | 37.2   |
| 12    | 5627.3    | 77.193  | 5.2    |
| 13    | 5612.3    | 76.885  | 36.4   |
| 14    | 5789.8    | 76.577  | 35.6   |
| 15    | 5282.7    | 69.978  | 10.4   |
| 16    | 5053.5    | 66.281  | 21.8   |
| 17    | 3991.2    | 52.875  | 18.0   |
| 18    | 3949.2    | 52.315  | 22.2   |
| 19    | 3675.2    | 49.728  | 21.6   |
| 20    | 2317.8    | 30.703  | 19.1   |
| 21    | 642.0     | 8.505   | 13.4   |

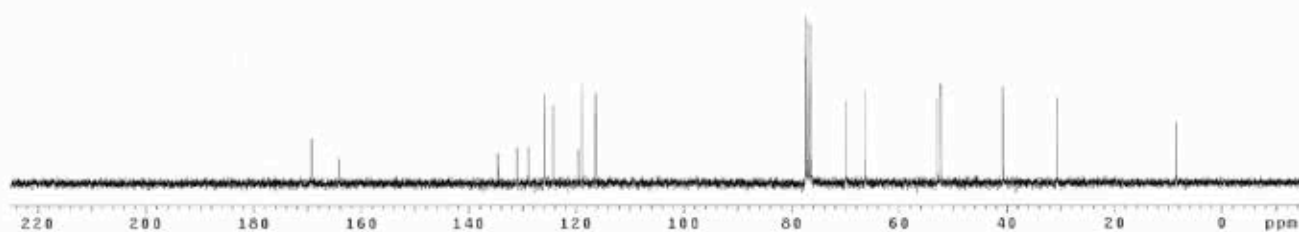

1H\_1H COSY Spectrum of 4o

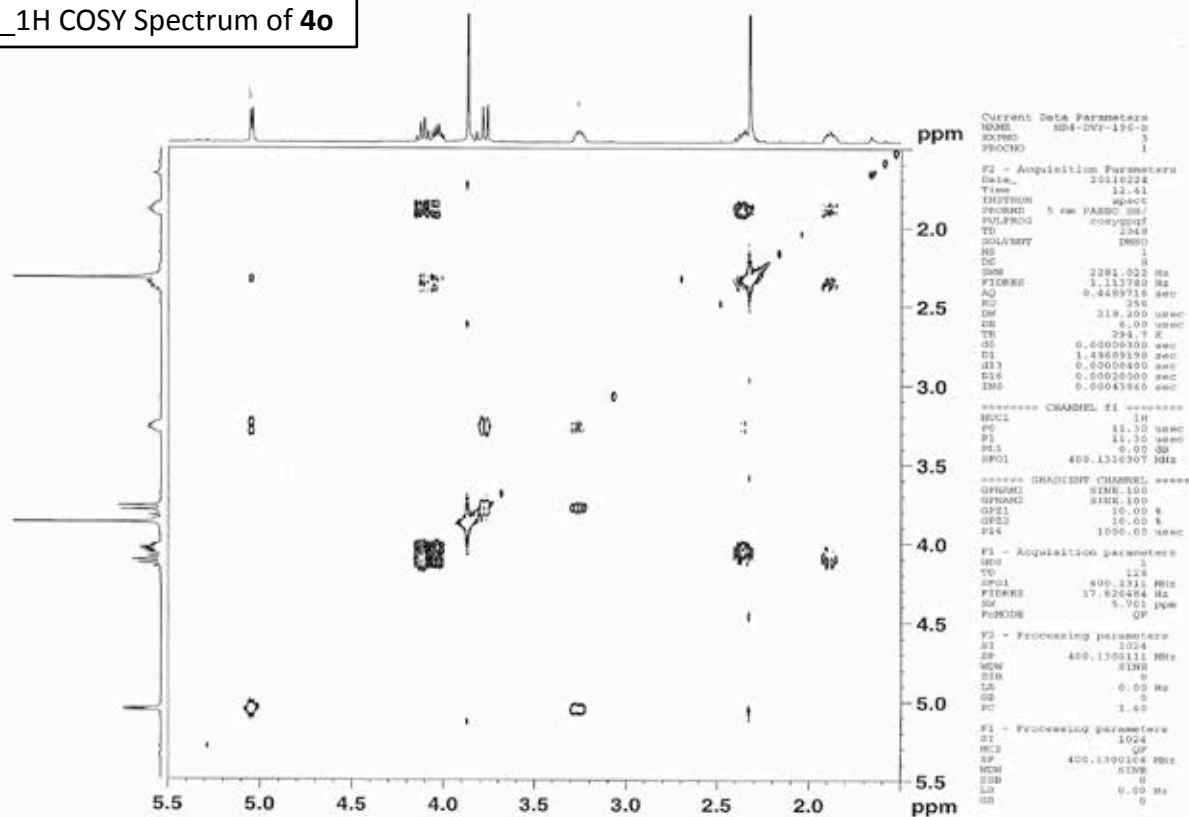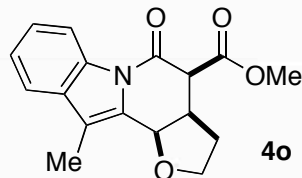

1H\_13C HSQC Spectrum of 4o

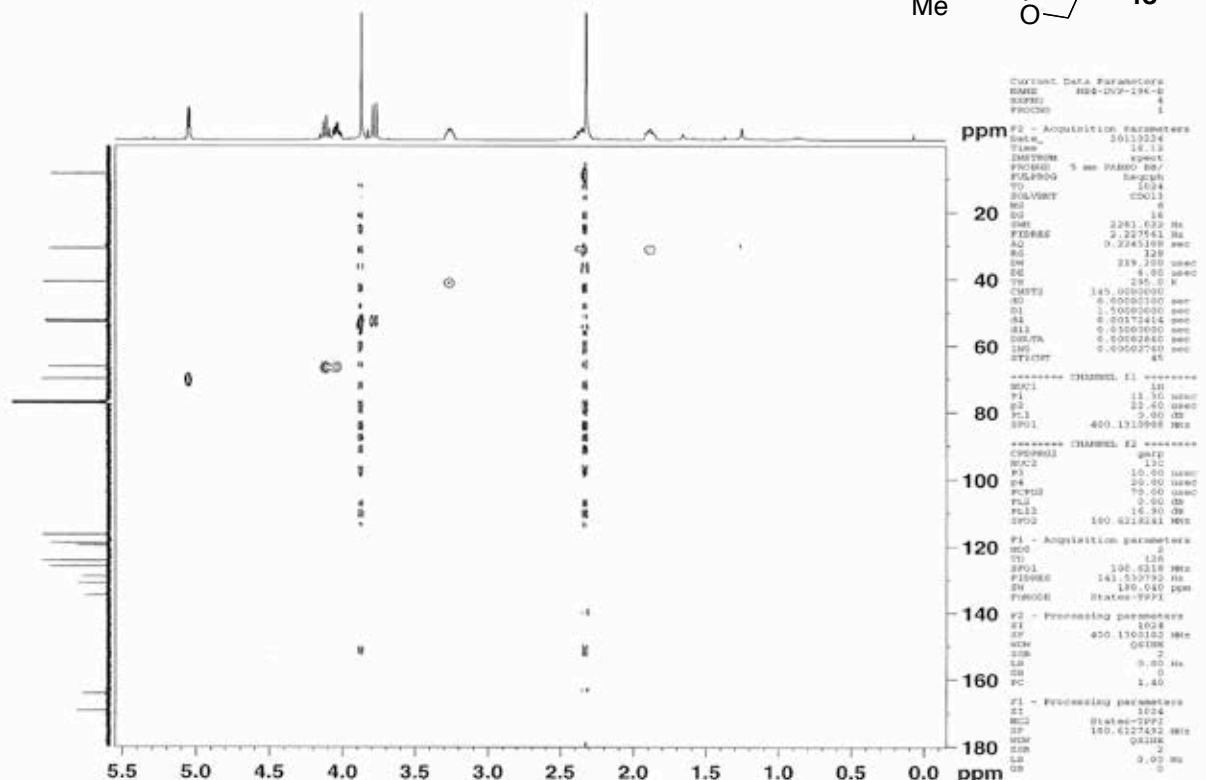

DEPT Spectra of **4o**

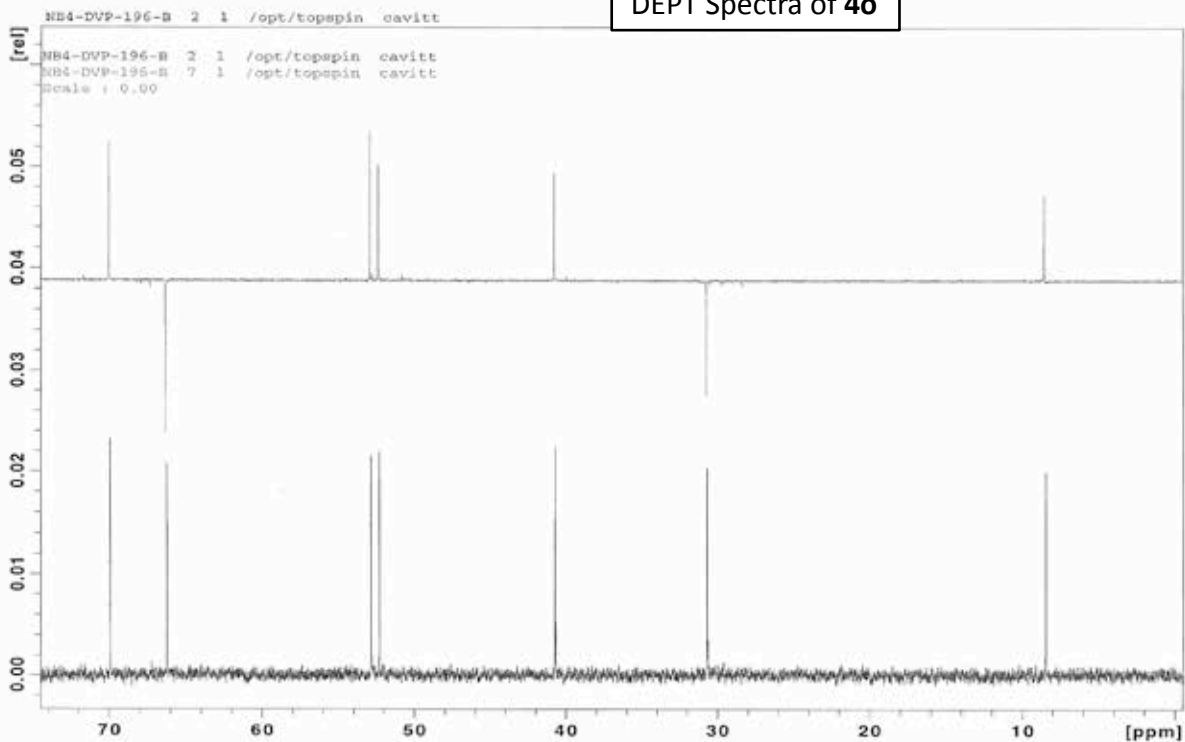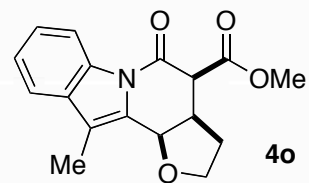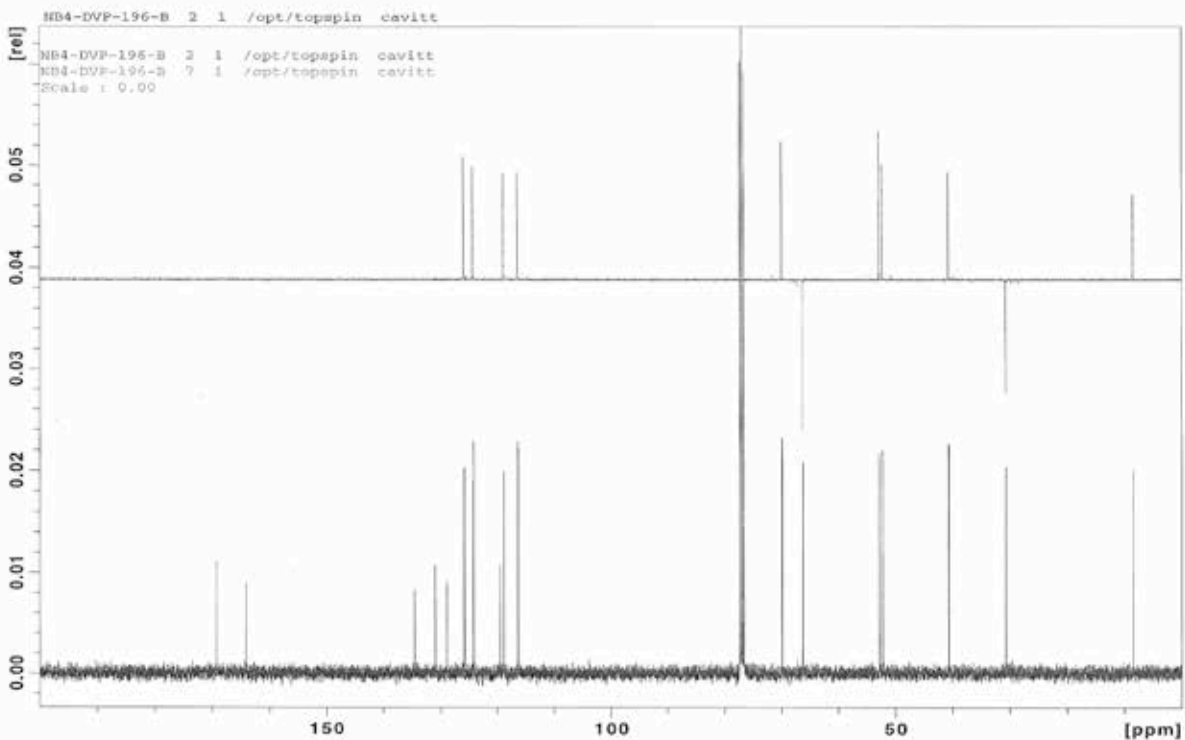



DEPT Spectra of **4o**

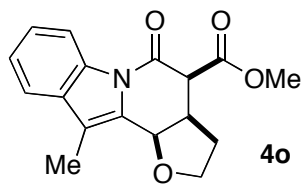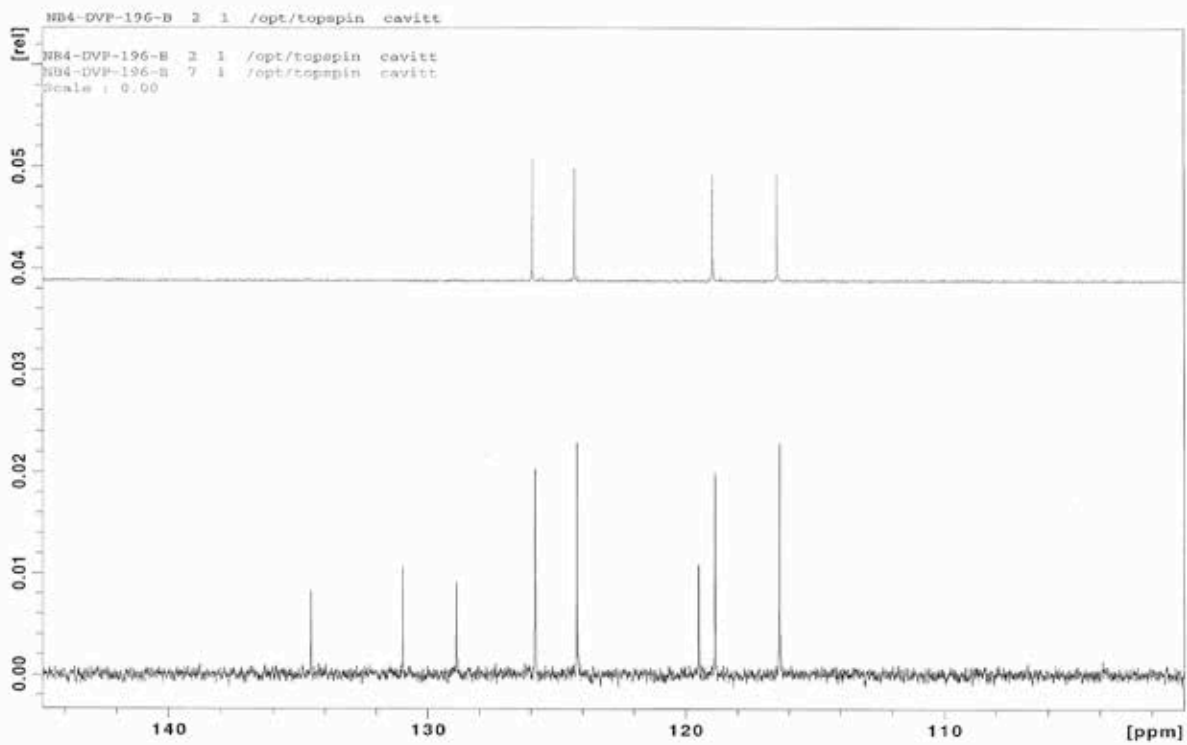

II-MAC-63-H  
File: xp  
Pulse Sequence: s2pul  
Solvent: cdcl3  
Ambient Temperature  
Operator: caw11  
Mercury-300 "r2d2"  
Acq. time 3.550 sec  
Width 4803.1 Hz  
55 repetitions  
OBSERVE H1, 300.2104335 MHz  
DATA PROCESSING  
FT size 65536  
Total time 8 min, 24 sec

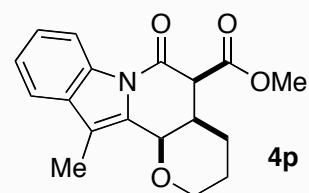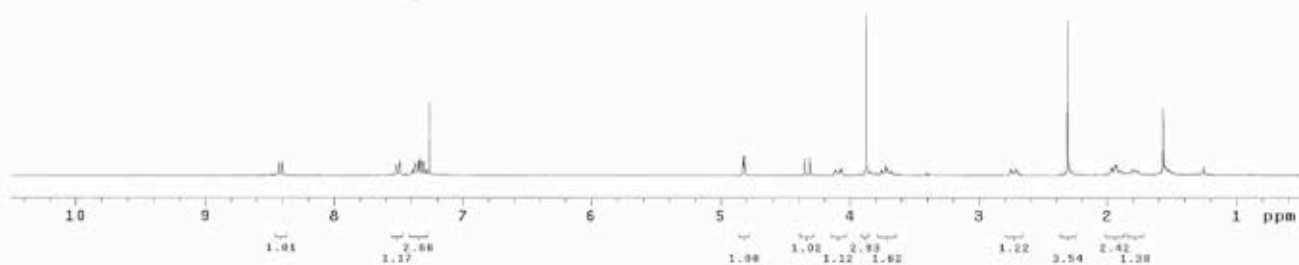

Std Carbon experiment  
Sample: MB-4-DVP-156-A-H  
File: xp  
Pulse Sequence: s2pul  
Solvent: cdcl3  
Ambient Temperature  
Operator: dpai1  
Mercury-300 "r2d2"  
Relax. delay 1.000 sec  
Pulse 30.0 degrees  
Acq. time 1.301 sec  
Width 18115.9 Hz  
230 repetitions  
OBSERVE C13, 75.4813148 MHz  
DECOUPLE H1, 300.2251607 MHz  
Power 48 dB  
continuously on  
WALTZ-16 modulated  
DATA PROCESSING  
Line broadening 0.5 Hz  
FT size 65536  
Total time 10 min, 45 sec

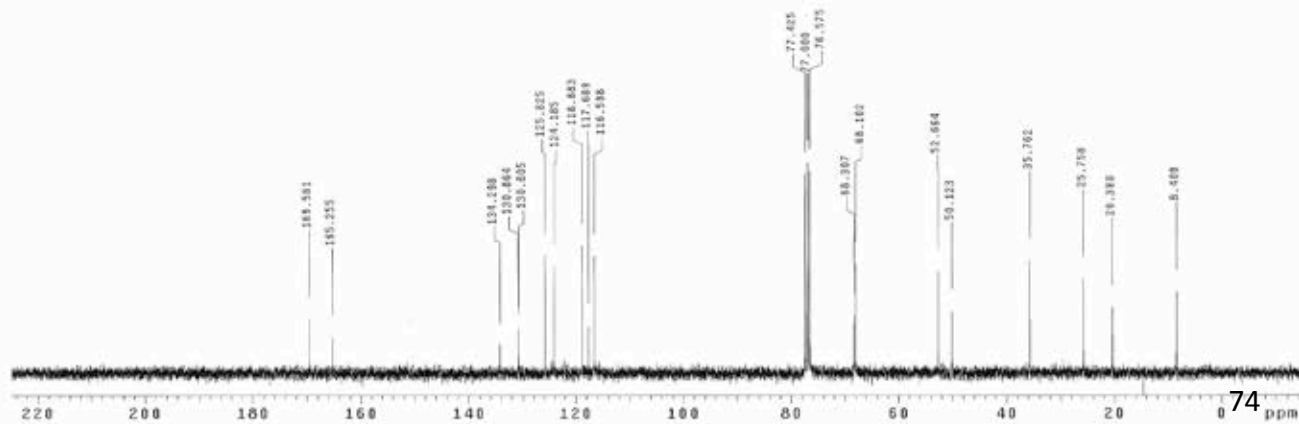

1H-1H COSY

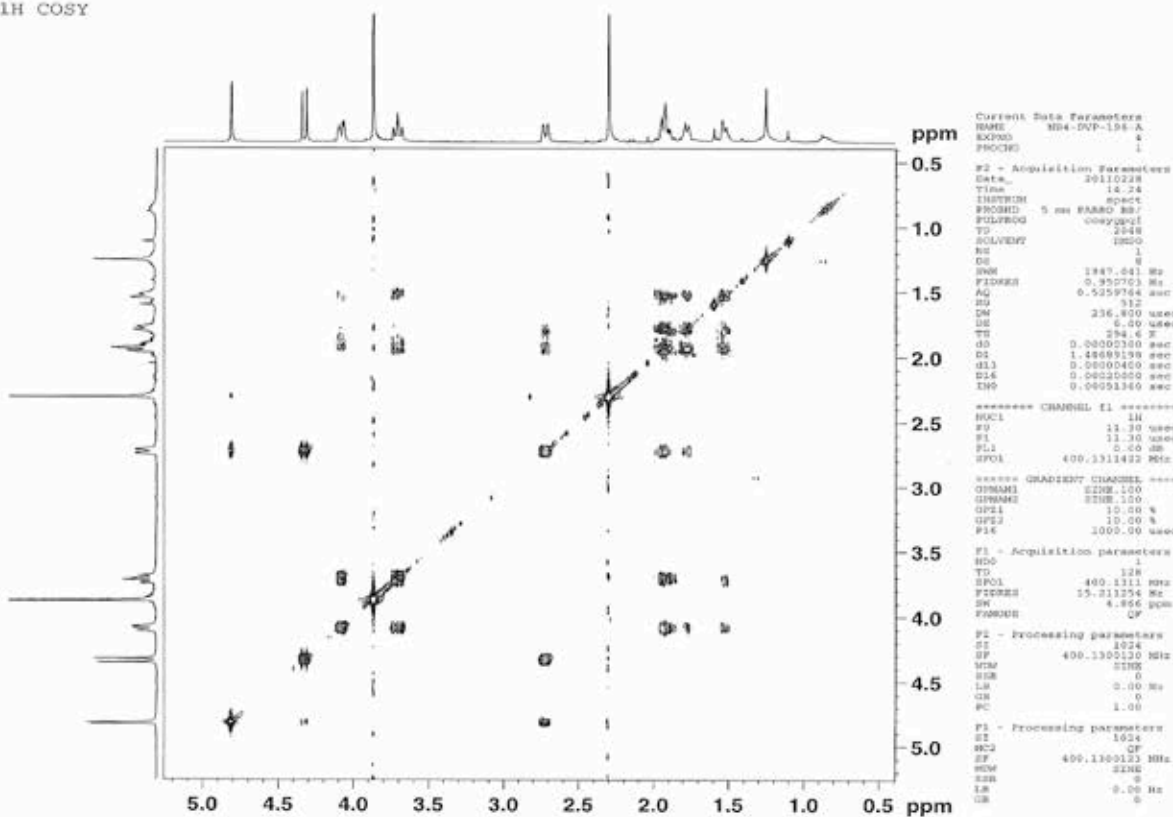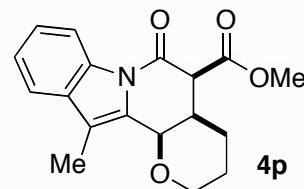

HSQC/GP

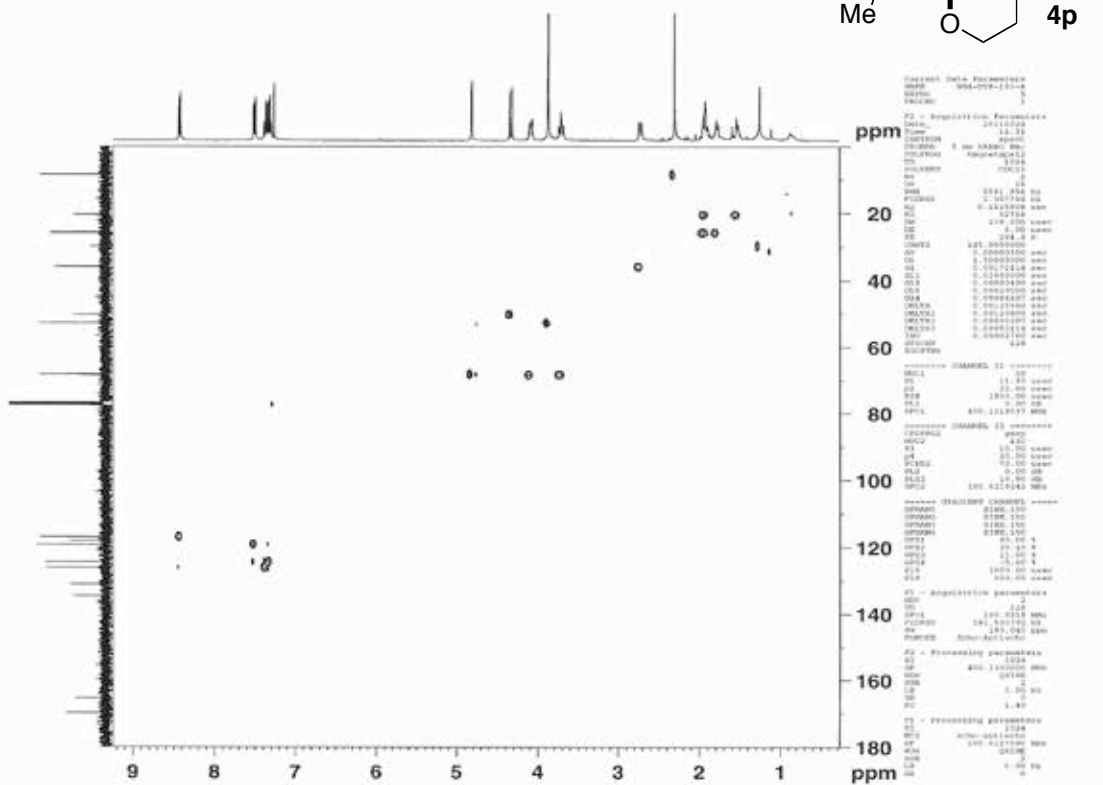

Std Proton parameters  
Sample: 3-MeCbz-cyclin-H  
File: xp  
Pulse Sequence: s2pul  
Solvent: cdcl3  
Ambient temperature  
Operator: dpatt11  
Mercury-300 "r2d2"  
  
Relax. delay 1.000 sec  
Pulse 30.0 degrees  
Acq. time 3.550 sec  
Width 4893.1 Hz  
16 repetitions  
OBSERVE H1: 300.2185962 MHz  
DATA PROCESSING  
FT size 65536  
Total time 1 min, 16 sec

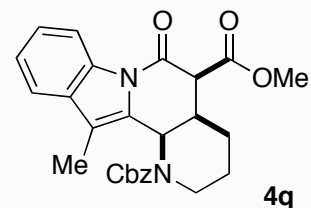

(7.1:1 mixture of diastereomers)

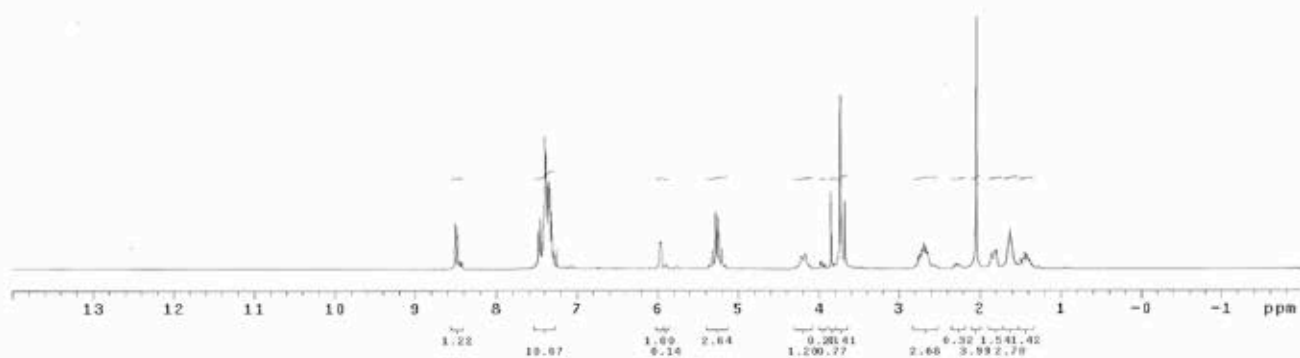

Std Carbon experiment  
Sample: 3-MeCbz-cyclin-C  
File: xp  
Pulse Sequence: s2pul  
Solvent: cdcl3  
Ambient temperature  
Operator: dpatt11  
Mercury-300 "r2d2"  
  
Relax. delay 1.000 sec  
Pulse 30.0 degrees  
Acq. time 1.331 sec  
Width 16115.3 Hz  
256 repetitions  
OBSERVE C13: 75.4900092 MHz  
DECOUPLE H1: 360.2199401 MHz  
Power 40 dB  
continuous ly on  
WALTZ-16 modulated  
DATA PROCESSING  
Line broadening 0.5 Hz  
FT size 55536  
Total time 10 min, 45 sec

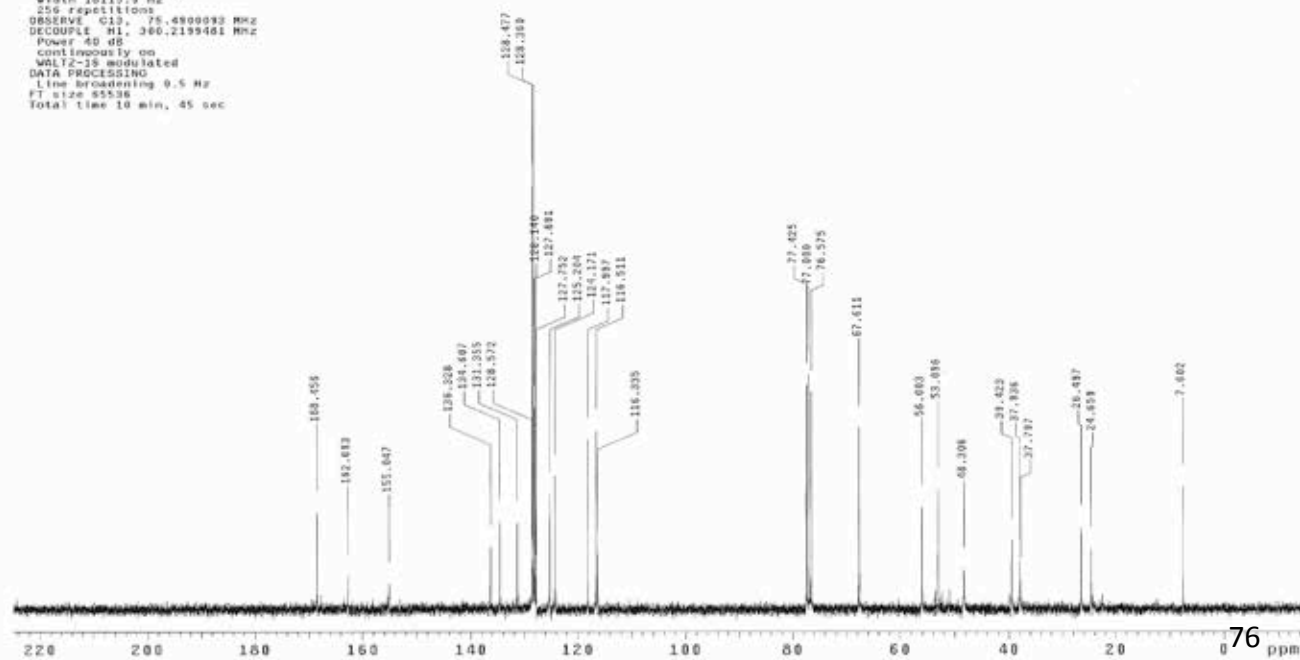

1H\_1H COSY Spectra of 4q

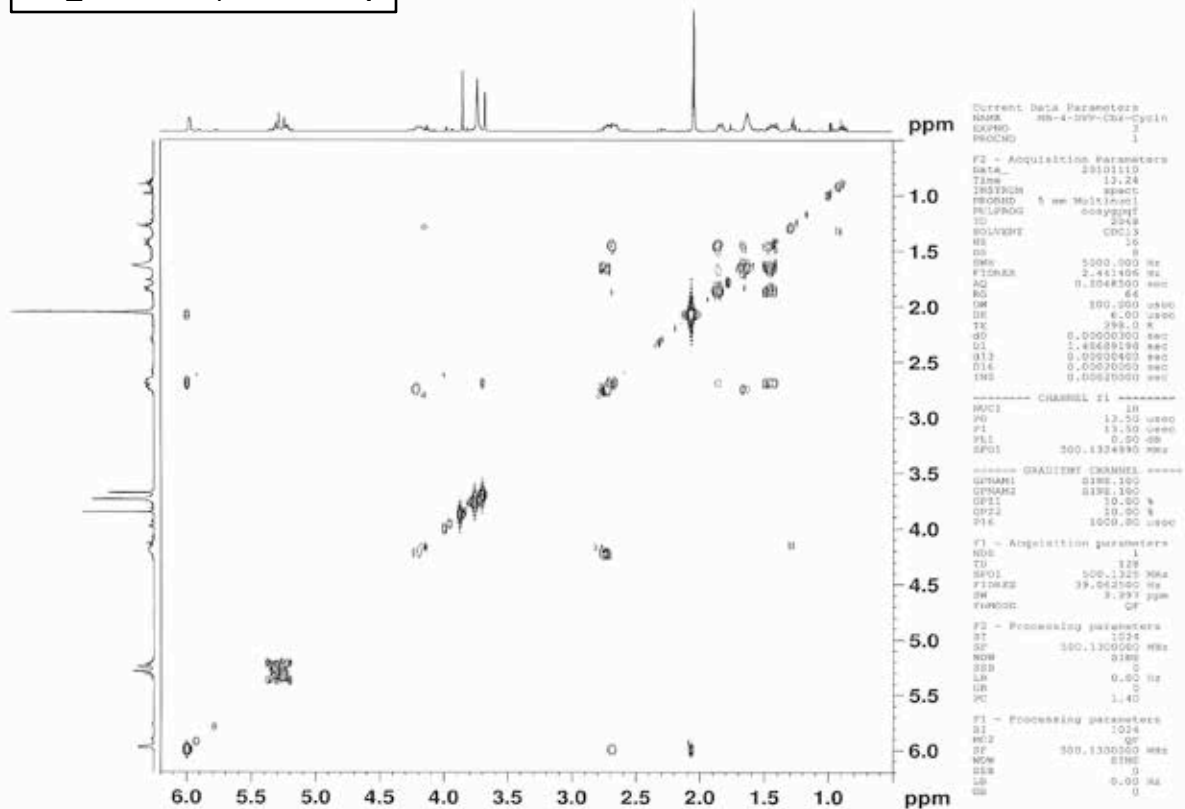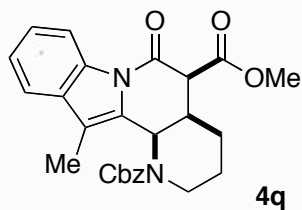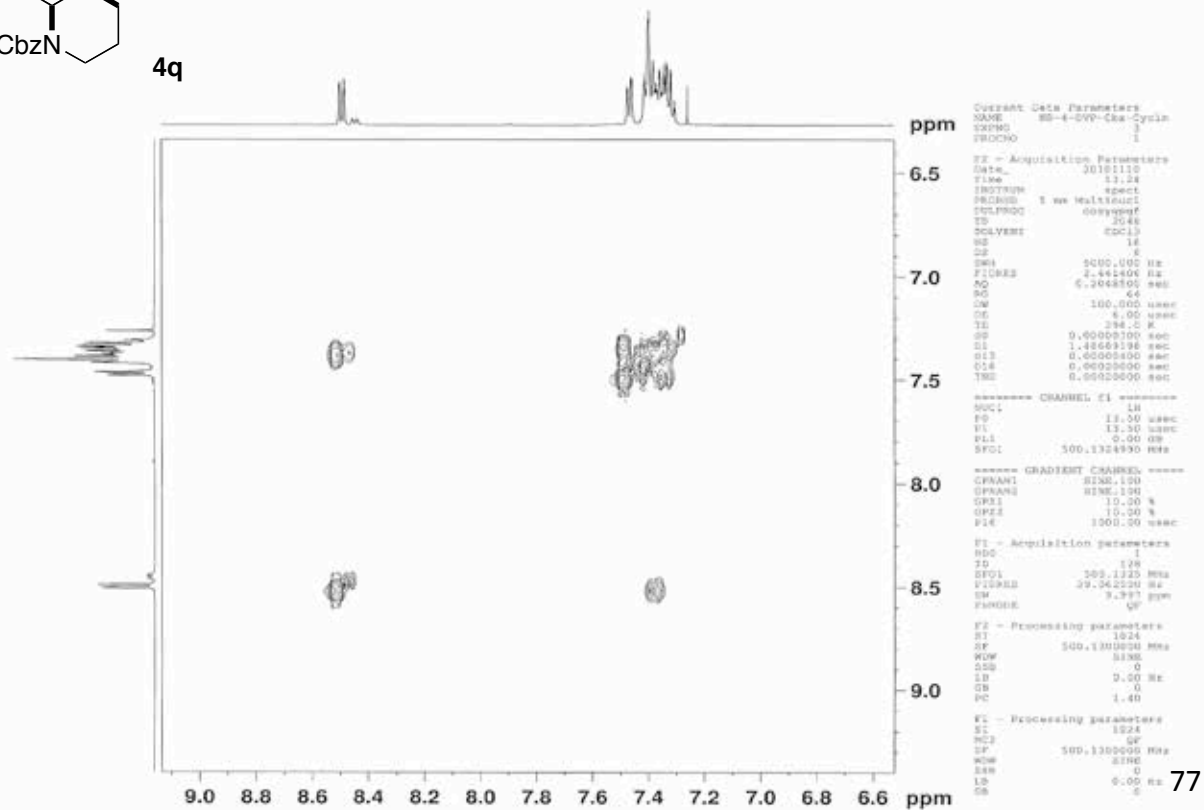

Decoupling Spectrum for **4q**

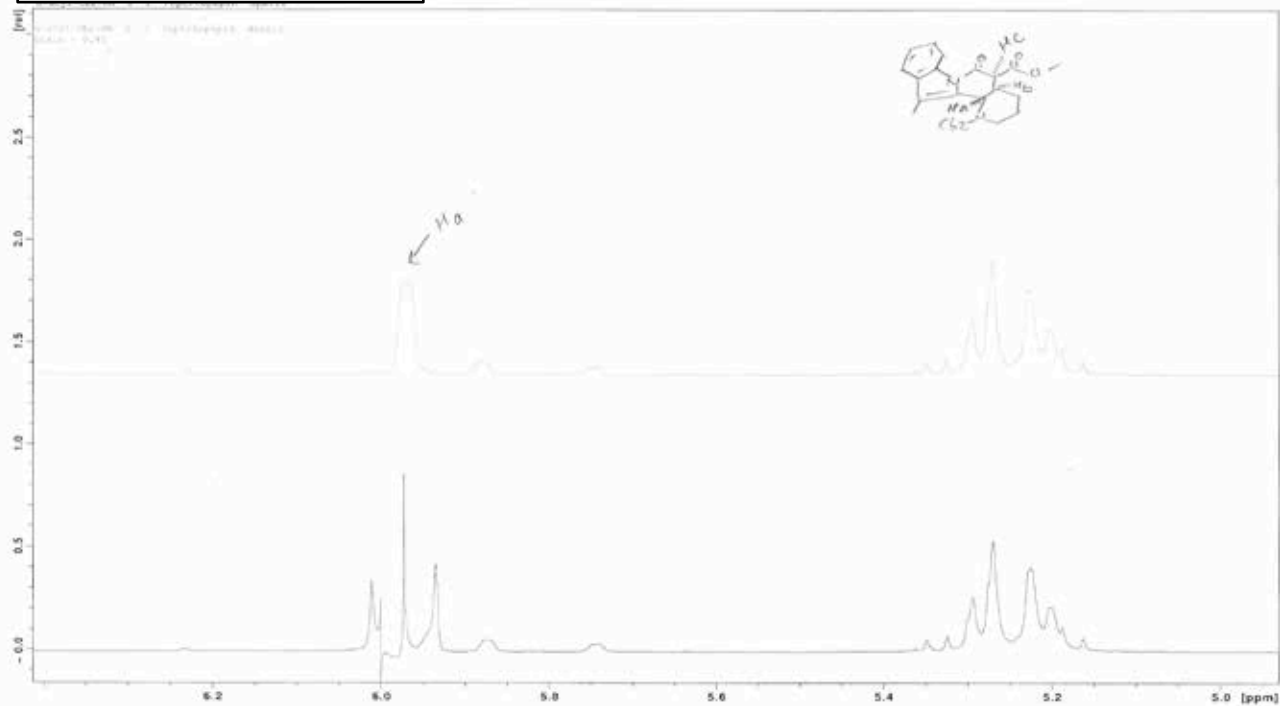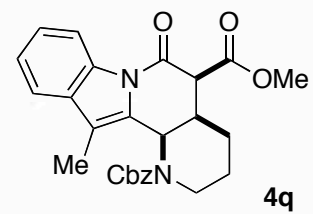

Decoupling Spectrum for **4q**

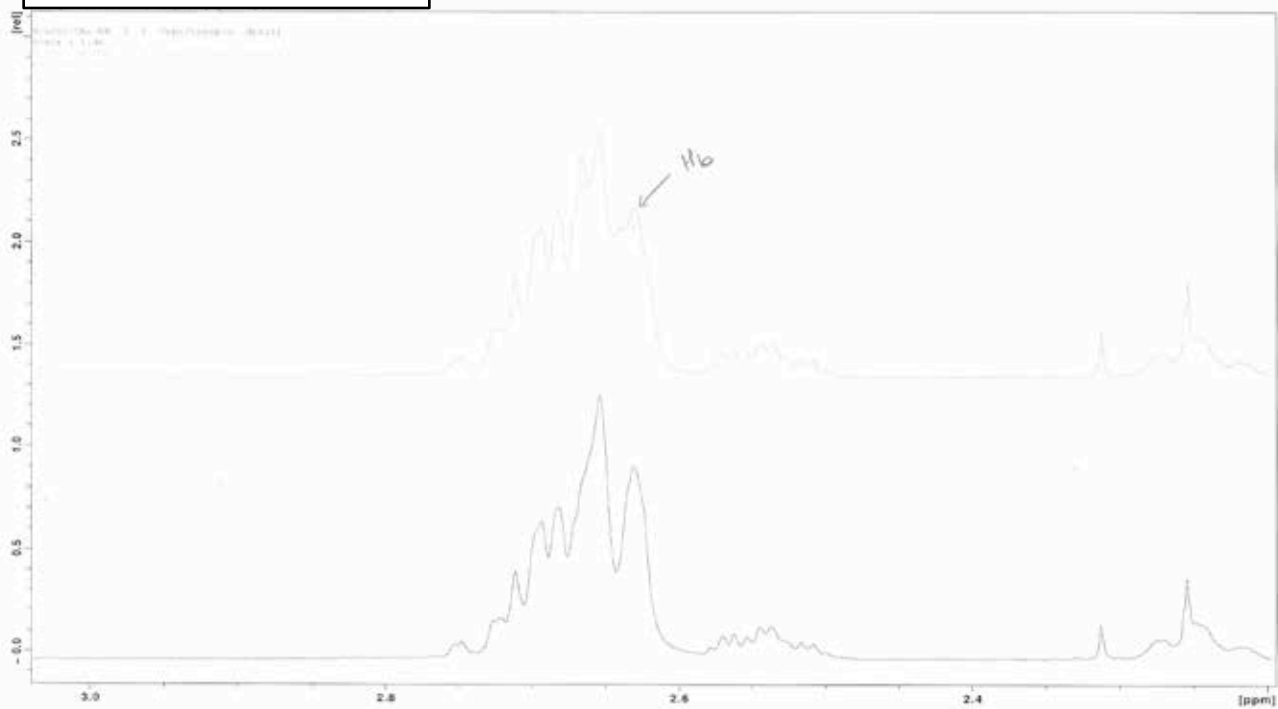

Decoupling Spectrum for **4q**

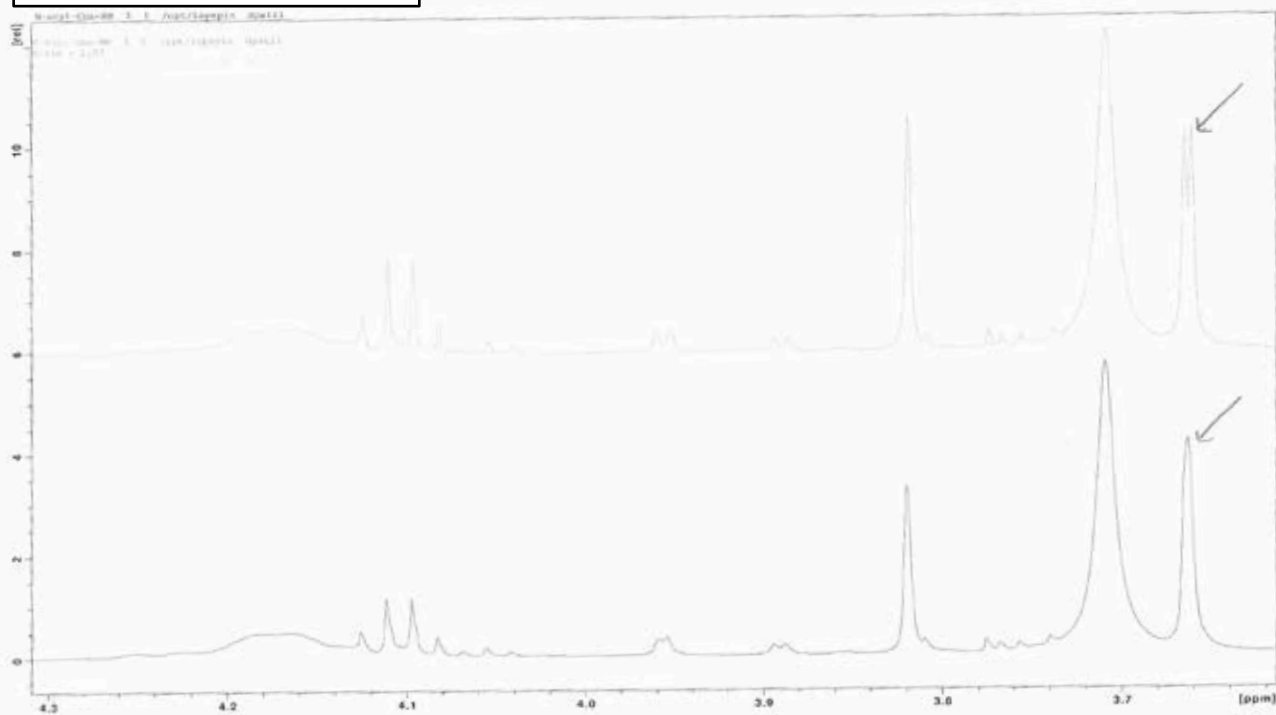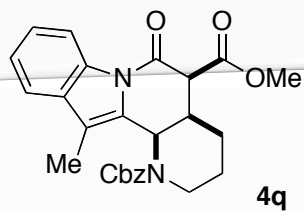

Decoupling Spectrum for **4q**

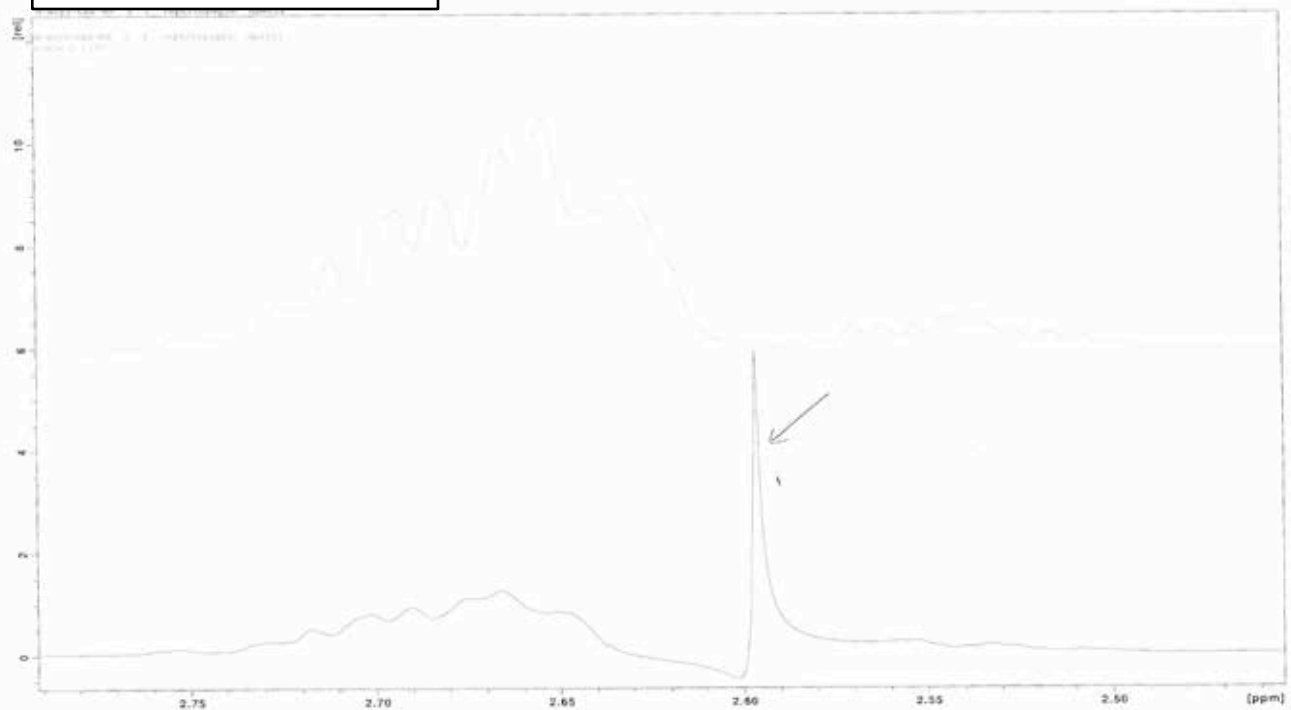

Decoupling Spectrum for **4q**

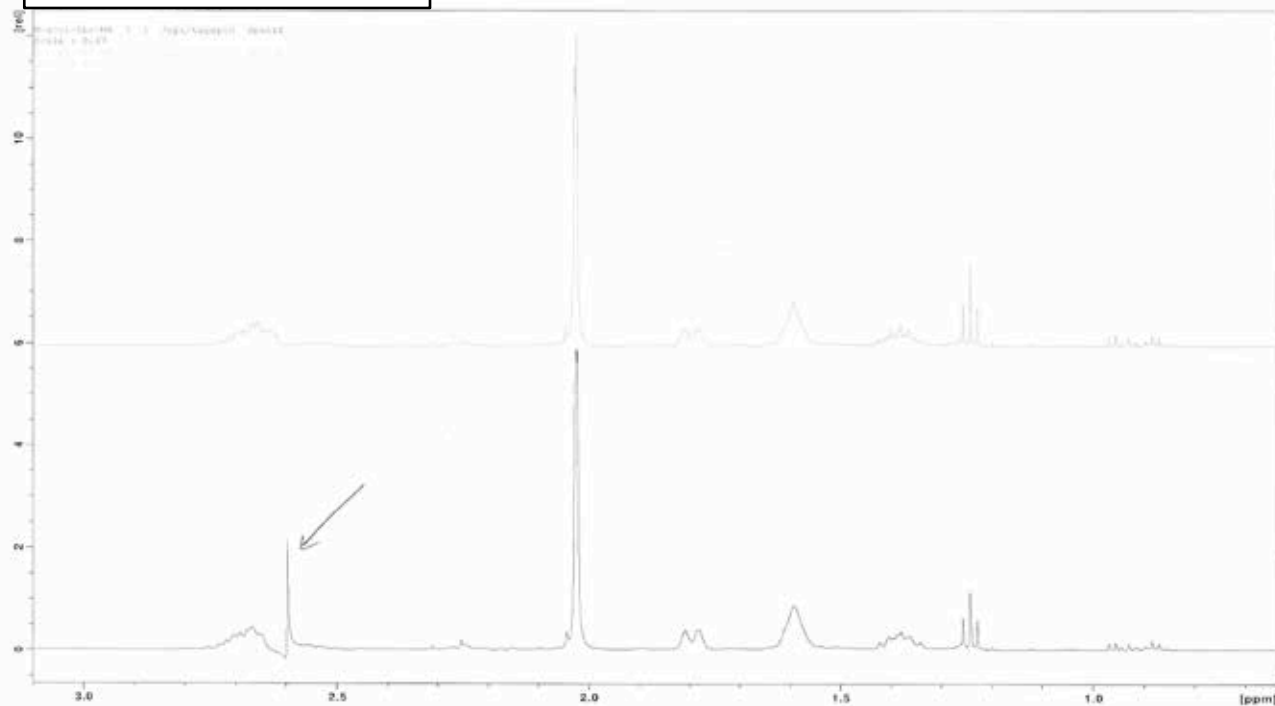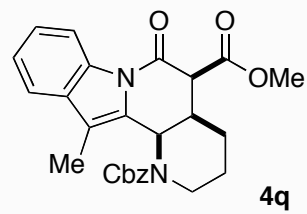

Decoupling Spectrum for **4q**

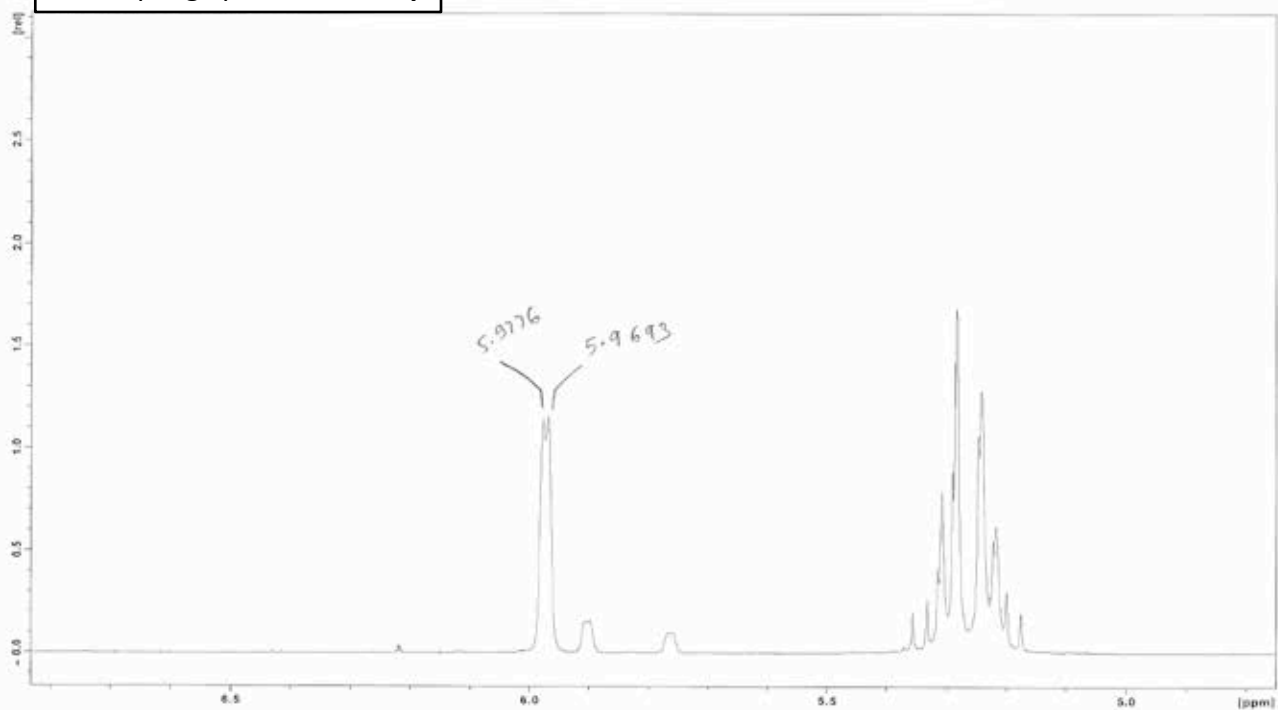



2.70 ppm!

NOE Spectra for **4q**

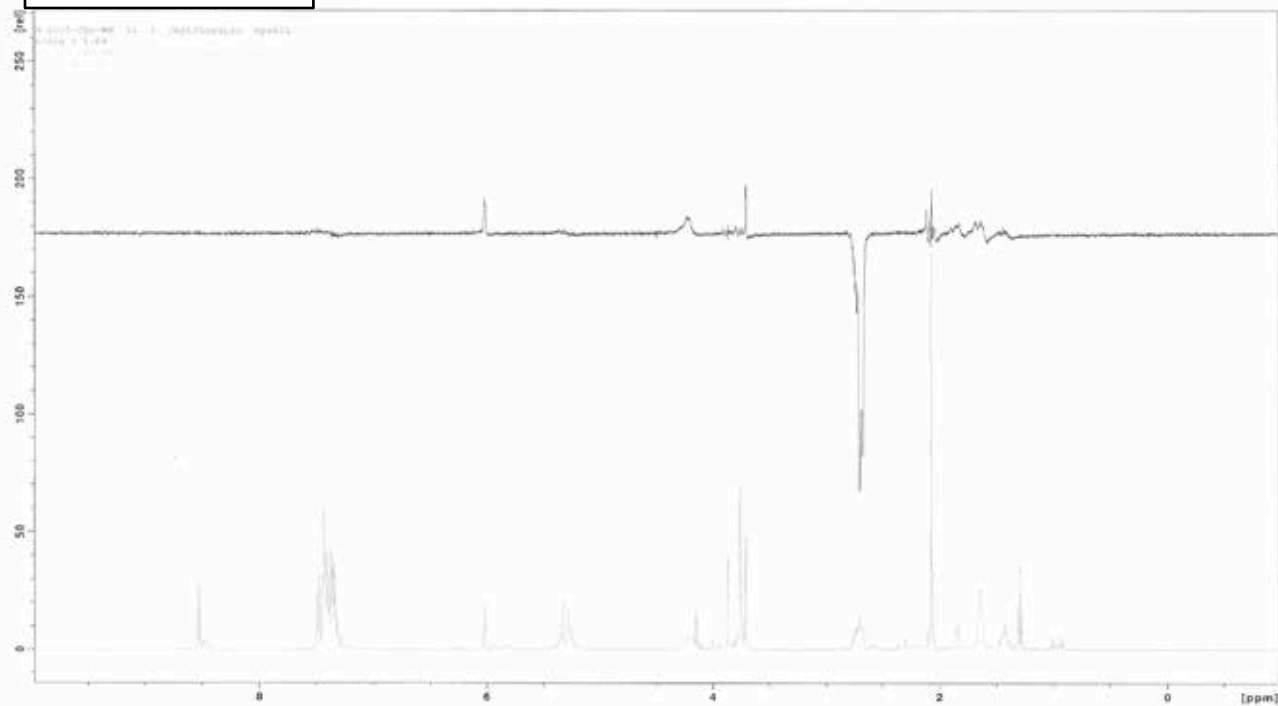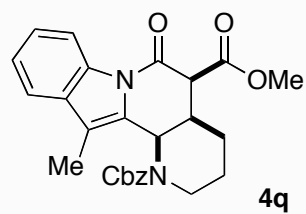

1.84 ppm!

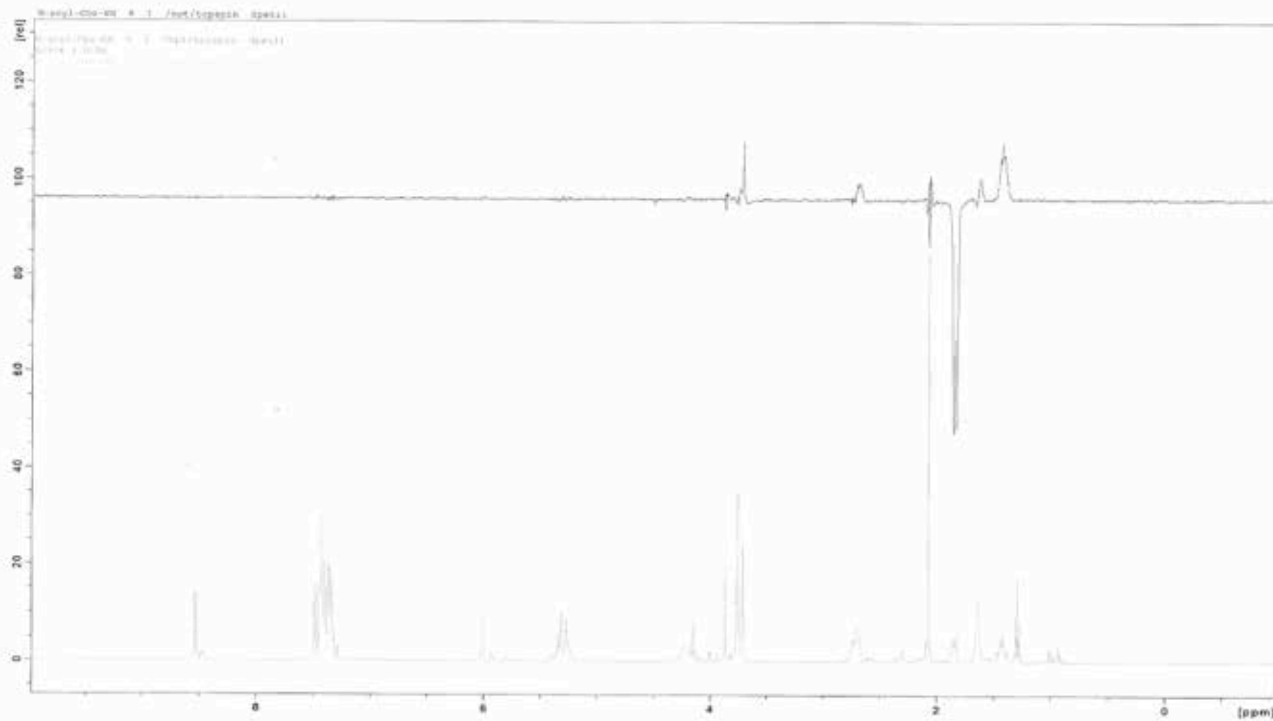

NOE Spectra for **4q**

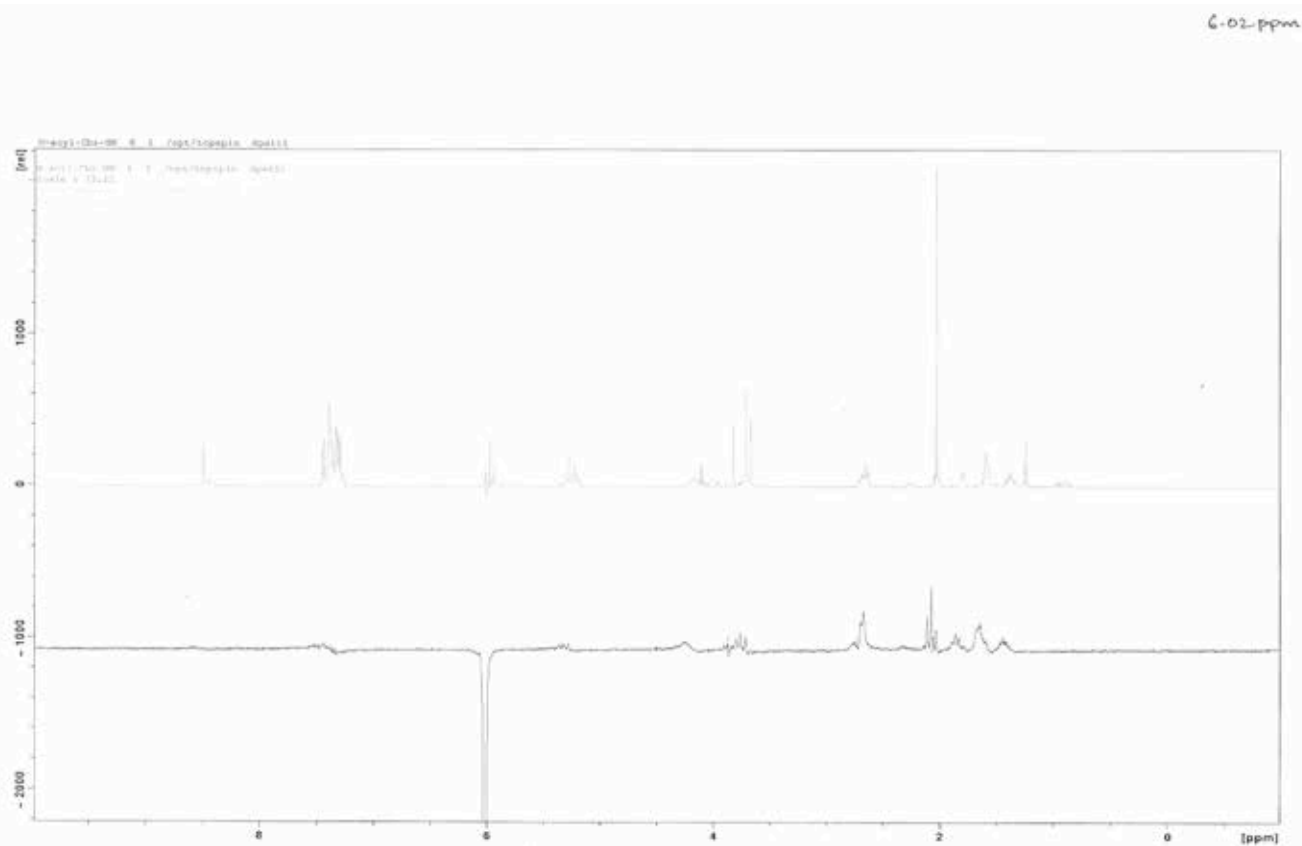

Std Proton parameters  
Sample: NR-5-DVP-33-A-H  
File: xp  
Pulse Sequence: s2pul  
Solvent: cdcl3  
Ambient Temperature  
Operator: dpat11  
Mercury-300 "r2d2"  
  
Relax. delay 1.000 sec  
Pulse 39.8 degrees  
Acq. time 3.550 sec  
Width 4003.1 Hz  
18 repetitions  
OBSERVE F1, 300.2105010 MHz  
DATA PROCESSING  
FT size 65536  
Total time 1 min, 18 sec

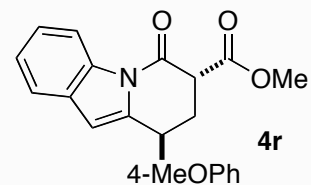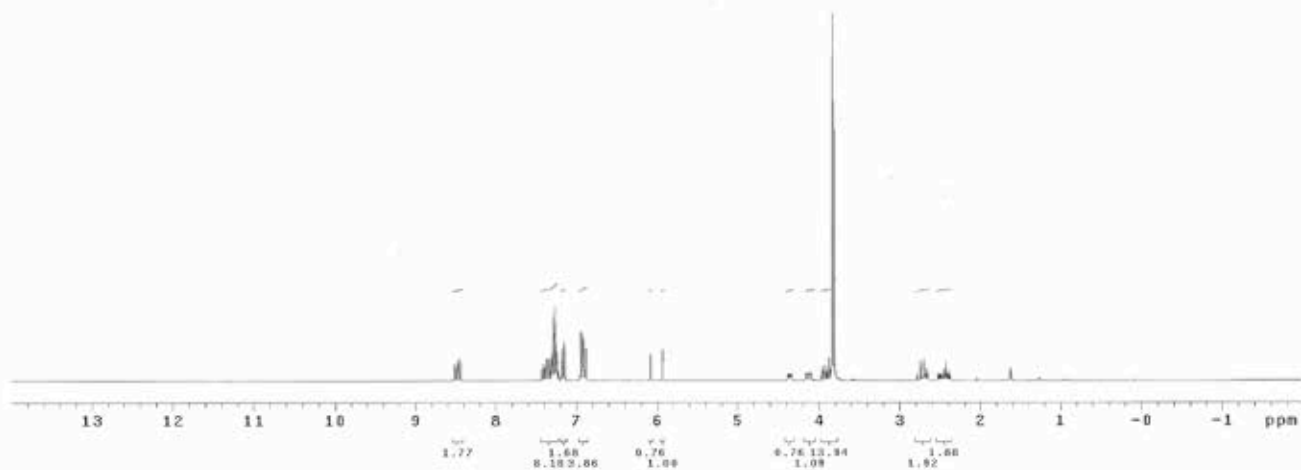

Std Carbon experiment  
Sample: NR-5-DVP-33-A-C  
File: xp  
Pulse Sequence: s2pul  
Solvent: cdcl3  
Ambient Temperature  
Operator: dpat11  
Mercury-300 "r2d2"  
  
Relax. delay 1.000 sec  
Pulse 30.0 degrees  
Acq. time 1.381 sec  
Width 18117.3 Hz  
224 repetitions  
OBSERVE G13, 75.4900904 MHz  
DECOUPLE H1, 300.2109481 MHz  
Power 40 dB  
Continuously on  
WALTZ-16 modulated  
DATA PROCESSING  
Line broadening 0.5 Hz  
FT size 65536  
Total time 10 min, 45 sec

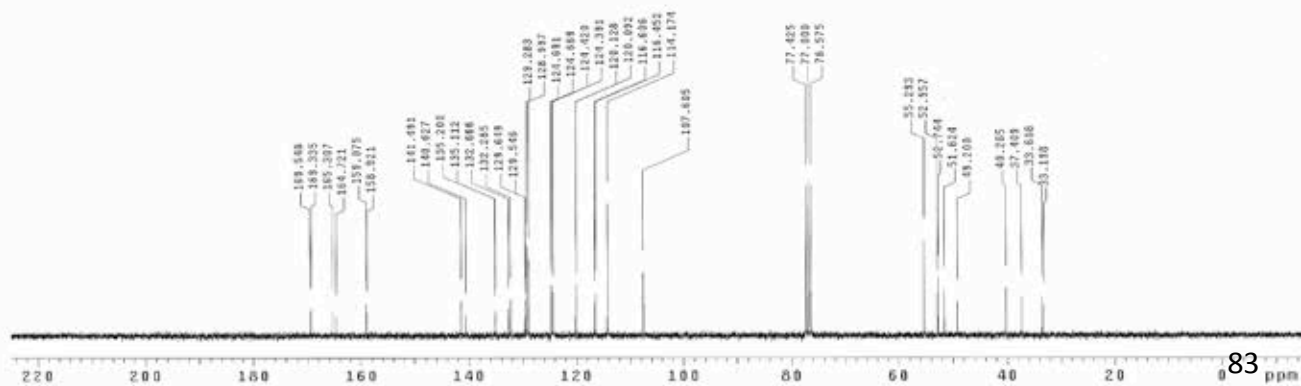

Std Proton parameters  
Sample: E1Br-4OMe-CP-Cyclin-H  
File: xg  
Pulse Sequence: s2pul  
Solvent: cdcl3  
Ambient temperature  
Operator: dpat11  
Mercury-300 "r2d2"  
  
Relax. delay 1.000 sec  
Pulse 30.0 degrees  
Acq. time 3.550 sec  
Width 4063.1 Hz  
16 repetitions  
OBSERVE H1, 300.2105657 MHz  
DATA PROCESSING  
FT size 65538  
Total time 1 min, 16 sec

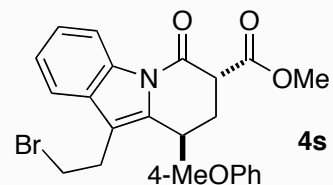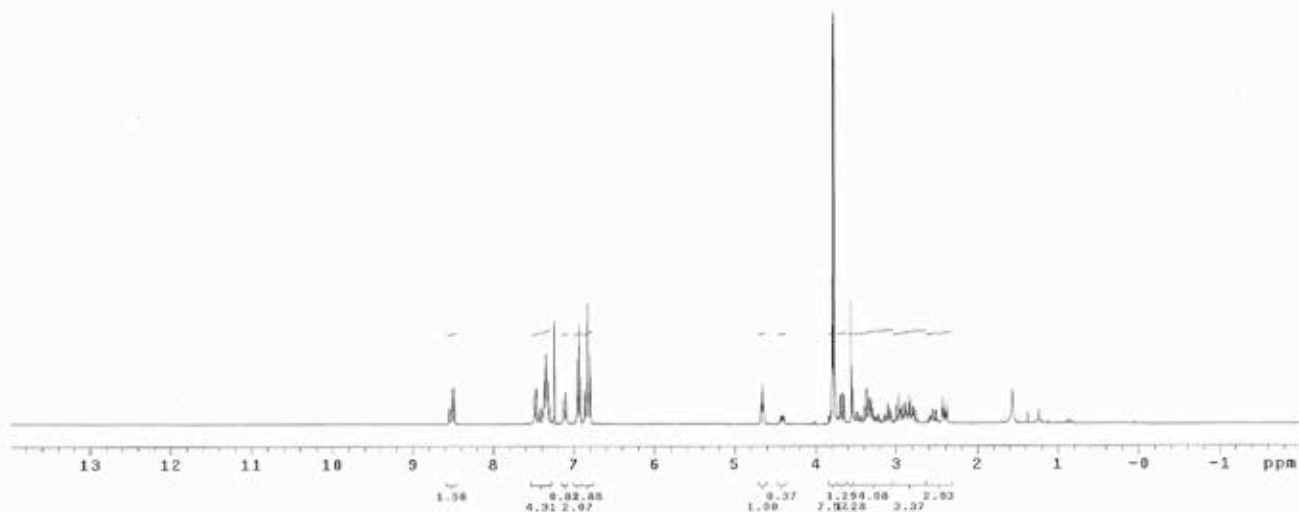

Std Carbon experiment  
Sample: NB-5-OVP-59-B-H  
File: xg  
Pulse Sequence: s2pul  
Solvent: cdcl3  
Temp: 32.0 C / 285.1 K  
Operator: dpat11  
Mercury-300 "r2d2"  
  
Relax. delay 1.000 sec  
Pulse 30.0 degrees  
Acq. time 1.091 sec  
Width 18117.9 Hz  
240 repetitions  
OBSERVE C13, 75.4913153 MHz  
DECUPLE H1, 300.2251667 MHz  
Power 10 dB  
continuously on  
WALTZ-16 modulated  
DATA PROCESSING  
Line broadening 0.5 Hz  
FT size 65536  
Total time 10 min, 45 sec

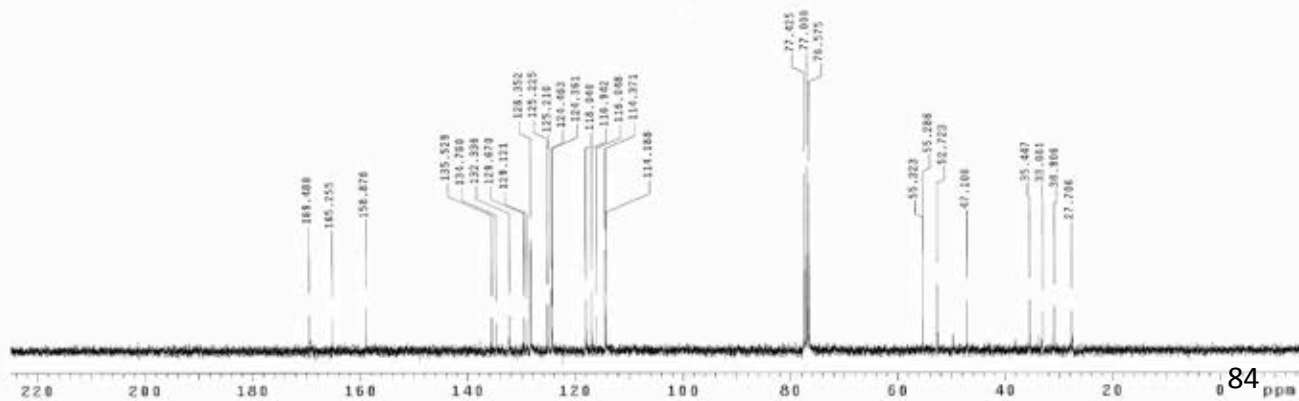

NPhthN-ethyl-cyclized  
 F1er xp  
 Pulse Sequence: zgpg30  
 Solvent: cdcl3  
 Ambient temperature  
 Operator: cavit  
 Mercury-300 "r2d1"  
 Relax. delay 1.000 sec  
 Pulse 30.0 degrees  
 Acq. time 3.550 sec  
 Width 4002.1 Hz  
 32 repetitions  
 OBSERVE H1, 300.138495 Mhz  
 DATA PROCESSING  
 FT size 53536  
 Total time 8 min, 34 sec

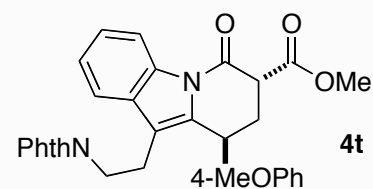

(2.9:1 *trans:cis*  
 mixture of diastereomers)

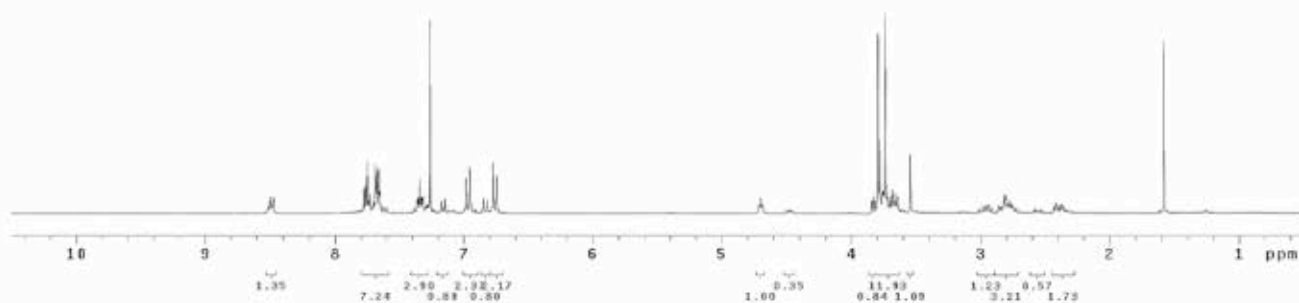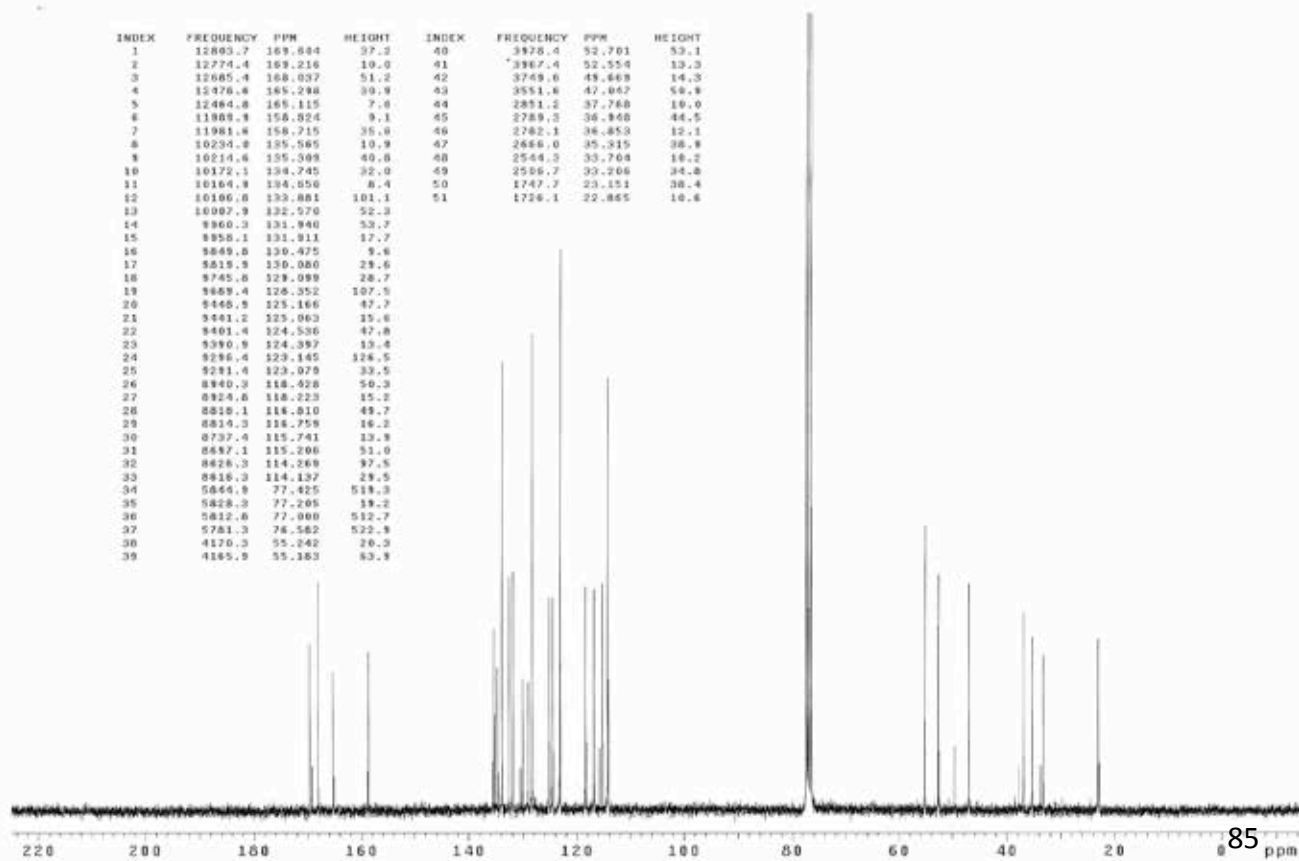

I\_mac\_205\_b  
 File: home/franco/cavitt/I\_mac\_205\_b.fid  
 Pulse Sequence: s2pul  
 Solvent: cdcl3  
 Ambient Temperature  
 Operator: Cavitt  
 File: I\_mac\_205\_b  
 Mercury-300 "r2d2"  
 Relax. delay 1.000 sec  
 Pulse 30.0 degrees  
 Acq. time 3.550 sec  
 Width 4003.1 Hz  
 21 repetitions  
 OBSERVE HI 300.2257108 MHz  
 DATA PROCESSING  
 FT size 65536  
 Total time 8 min, 34 sec

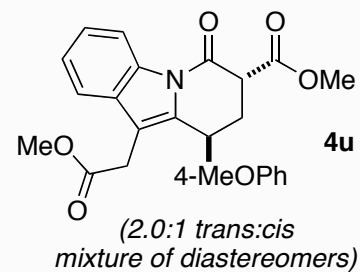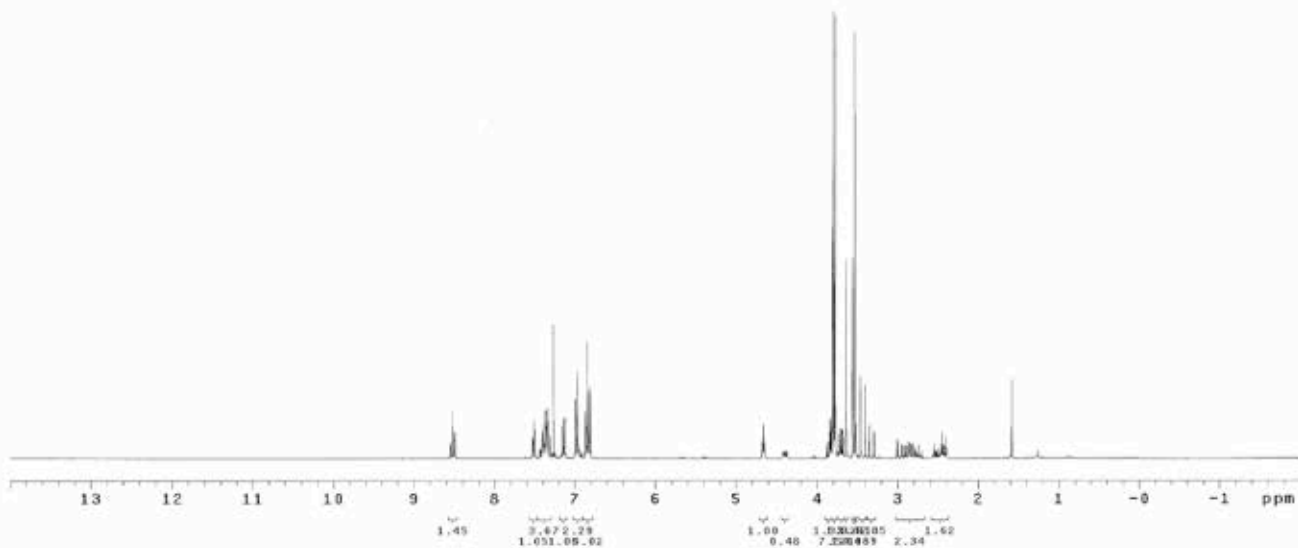

I\_mac\_205\_13C\_b  
 File: home/franco/cavitt/I\_mac\_205\_13C\_b.fid  
 Pulse Sequence: s2pul  
 Solvent: cdcl3  
 Ambient Temperature  
 Operator: Cavitt  
 File: I\_mac\_205\_13C\_b  
 Mercury-300 "r2d2"  
 Relax. delay 1.000 sec  
 Pulse 30.0 degrees  
 Acq. time 1.301 sec  
 Width 16115.9 Hz  
 2718 repetitions  
 OBSERVE C13 75.4915143 MHz  
 DECOUPLE HI 300.2251067 MHz  
 Power 40 dB  
 continuously on  
 WALTZ-16 modulated  
 DATA PROCESSING  
 Line broadening 0.5 Hz  
 FT size 65536  
 Total time 42 hr, 54 min, 2 sec

| INDEX | FREQUENCY | PPM     | HEIGHT | INDEX | FREQUENCY | PPM    | HEIGHT |
|-------|-----------|---------|--------|-------|-----------|--------|--------|
| 1     | 12897.3   | 170.844 | 8.4    | 40    | 3566.7    | 47.267 | 27.3   |
| 2     | 12802.3   | 170.646 | 15.0   | 41    | 2966.3    | 38.525 | 9.8    |
| 3     | 12792.8   | 169.460 | 17.6   | 42    | 2679.4    | 35.427 | 21.8   |
| 4     | 12771.8   | 169.182 | 6.2    | 43    | 2572.1    | 34.072 | 8.8    |
| 5     | 12472.1   | 165.210 | 11.5   | 44    | 2504.7    | 33.178 | 16.7   |
| 6     | 11995.5   | 158.900 | 7.4    | 45    | 2241.5    | 29.893 | 23.9   |
| 7     | 11990.6   | 158.824 | 14.9   | 46    | 2222.2    | 29.436 | 10.2   |
| 8     | 10290.5   | 136.314 | 6.7    |       |           |        |        |
| 9     | 10251.8   | 135.002 | 14.5   |       |           |        |        |
| 10    | 10162.4   | 134.630 | 12.2   |       |           |        |        |
| 11    | 10155.4   | 134.490 | 5.9    |       |           |        |        |
| 12    | 9987.0    | 132.294 | 8.6    |       |           |        |        |
| 13    | 9356.4    | 131.820 | 18.4   |       |           |        |        |
| 14    | 8837.2    | 130.200 | 7.3    |       |           |        |        |
| 15    | 8612.3    | 128.979 | 14.0   |       |           |        |        |
| 16    | 8755.4    | 128.225 | 24.3   |       |           |        |        |
| 17    | 8700.8    | 128.500 | 50.1   |       |           |        |        |
| 18    | 8631.0    | 127.577 | 4.1    |       |           |        |        |
| 19    | 8455.7    | 125.256 | 23.6   |       |           |        |        |
| 20    | 8452.0    | 125.218 | 32.5   |       |           |        |        |
| 21    | 8401.6    | 124.538 | 23.2   |       |           |        |        |
| 22    | 8381.0    | 124.288 | 11.2   |       |           |        |        |
| 23    | 8342.7    | 118.480 | 33.5   |       |           |        |        |
| 24    | 8310.1    | 118.028 | 12.2   |       |           |        |        |
| 25    | 8014.4    | 116.761 | 30.9   |       |           |        |        |
| 26    | 8626.4    | 114.271 | 58.6   |       |           |        |        |
| 27    | 8617.6    | 114.154 | 23.5   |       |           |        |        |
| 28    | 8481.0    | 112.345 | 8.3    |       |           |        |        |
| 29    | 8457.8    | 112.037 | 18.9   |       |           |        |        |
| 30    | 8044.5    | 77.418  | 177.6  |       |           |        |        |
| 31    | 8027.9    | 77.200  | 6.2    |       |           |        |        |
| 32    | 8012.4    | 76.995  | 182.1  |       |           |        |        |
| 33    | 5780.4    | 76.570  | 175.5  |       |           |        |        |
| 34    | 4173.8    | 55.288  | 45.4   |       |           |        |        |
| 35    | 3981.9    | 52.747  | 25.7   |       |           |        |        |
| 36    | 3971.4    | 52.608  | 11.7   |       |           |        |        |
| 37    | 3928.6    | 52.014  | 23.0   |       |           |        |        |
| 38    | 3918.3    | 51.965  | 11.9   |       |           |        |        |
| 39    | 3762.9    | 50.110  | 14.7   |       |           |        |        |

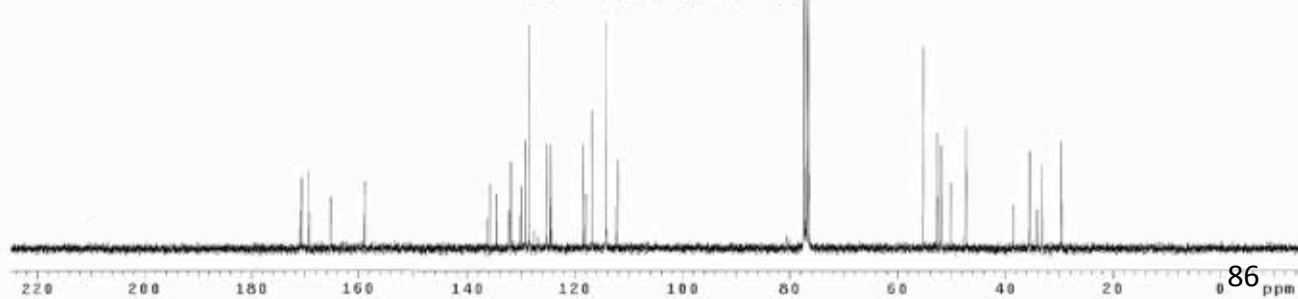

Std Proton parameters  
Sample: NS-5-DVP-52-A-II  
File: xp  
Pulse Sequence: s2pul  
Solvent: cdcl3  
Ambient Temperature  
Operator: dpatt11  
Mercury-300 "r1d2"  
Relax. delay 1.000 sec  
Pulse 30.0 degrees  
Acq. time 3.558 sec  
Width 4883.1 Hz  
16 repetitions  
OBSERVE H1, 300.2207170 MHz  
DATA PROCESSING  
F1 size 85538  
Total time 1 min, 10 sec

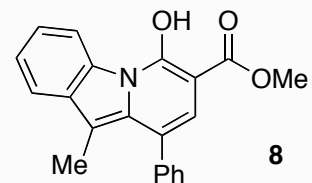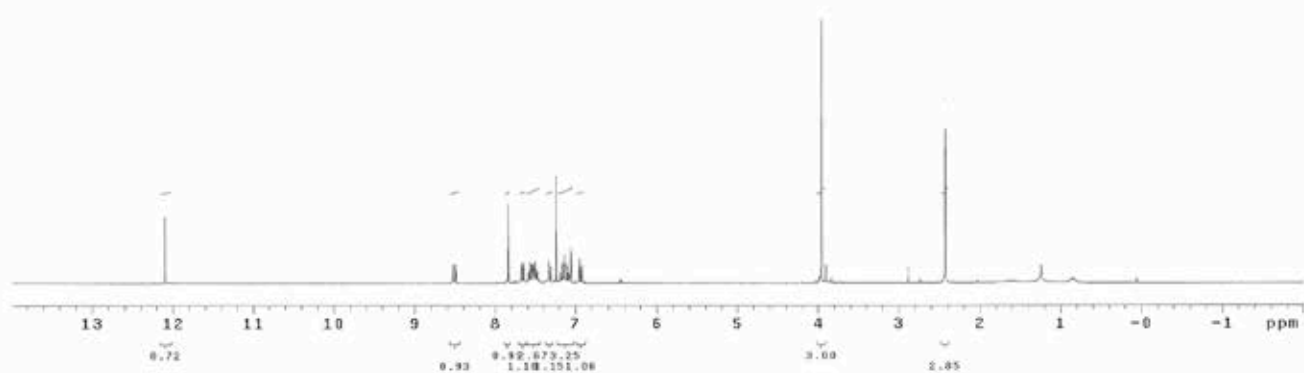

Std Carbon experiment  
Sample: NS-5-DVP-52-A-II  
File: xp  
Pulse Sequence: s2pul  
Solvent: cdcl3  
Ambient Temperature  
Operator: dpatt11  
Mercury-300 "r1d2"  
Relax. delay 1.000 sec  
Pulse 30.0 degrees  
Acq. time 1.301 sec  
Width 18115.8 Hz  
1312 repetitions  
OBSERVE C13, 75.4913131 MHz  
DECOUPLE H1, 300.2251667 MHz  
Power 60 dB  
CONTINUOUSLY ON  
WALTZ-16 modulated  
DATA PROCESSING  
Line broadening 0.5 Hz  
F1 size 65538  
Total time 2 hr, 7 sec

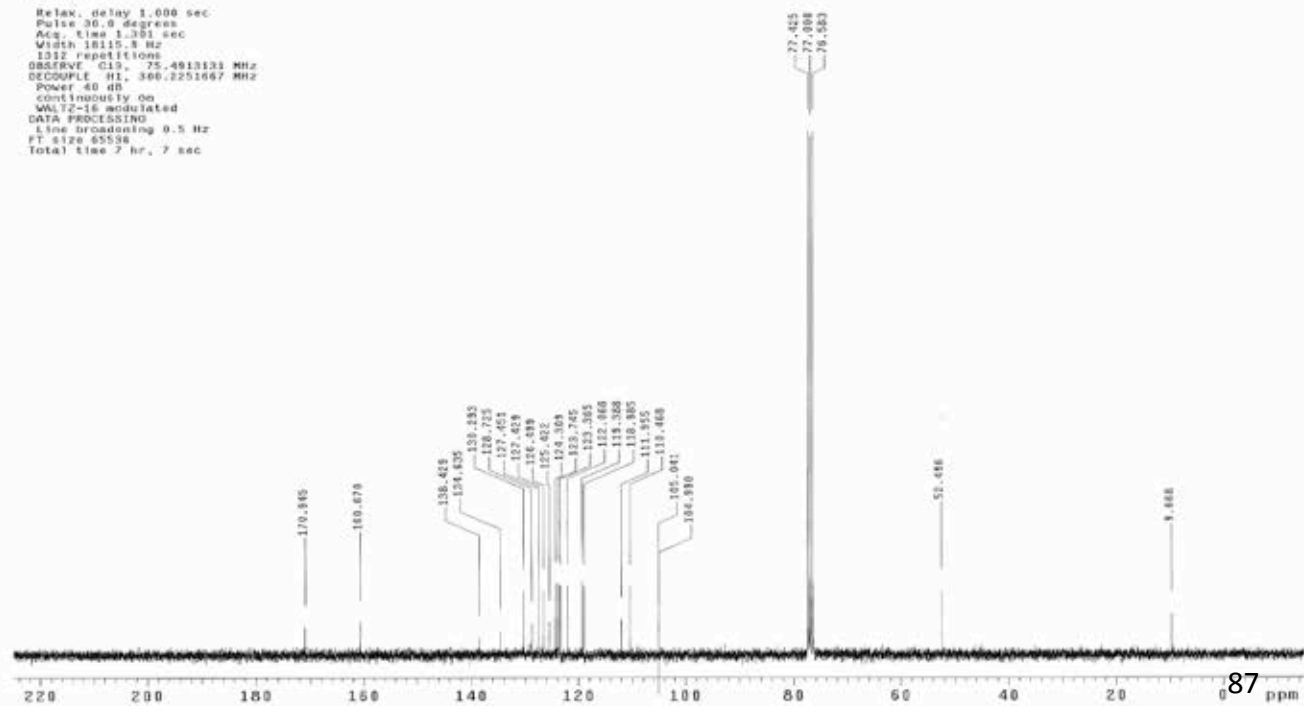

Supplement: c1cc14131g.pdf [file c1cc14131g.pdf]
